# Supplementary material for: Synthesis and Biological Evaluation of Bicyclo[1.1.1]pentane-Containing Aromatic Lipoxin A4 Analogues
Source: PubMed Central journal article supplement (PMC9400386; doi:10.1021/acs.orglett.2c02345), 2022-08-08

# Synthesis and Biological Evaluation of Bicyclo[1.1.1]pentane-containing Aromatic Lipoxin A<sub>4</sub> Analogs

Benjamin Owen<sup>1</sup>, Monica de Gaetano<sup>2</sup>, Andrew Gaffney<sup>3</sup>, Catherine Godson<sup>3</sup> and Patrick J. Guiry<sup>1</sup>

<sup>1</sup> Centre for Synthesis and Chemical Biology, School of Chemistry, University College Dublin, Belfield, Dublin 4, Ireland.

<sup>2</sup> School of Biology & Environmental Science, Diabetes Complications Research Centre, UCD Conway Institute, University College Dublin, Belfield, Dublin 4, Ireland.

<sup>3</sup> School of Medicine, Diabetes Complications Research Centre, UCD Conway Institute, University College Dublin, Belfield, Dublin 4, Ireland.

## Supporting Information

### Table of Contents

|           |                                                                                  |            |
|-----------|----------------------------------------------------------------------------------|------------|
| <b>1.</b> | <b>General Experimental Considerations</b>                                       | <b>S2</b>  |
| <b>2.</b> | <b>Experimental Procedures and Characterization Data</b>                         | <b>S4</b>  |
| <b>3.</b> | <b>SFC Chromatograms</b>                                                         | <b>S28</b> |
| <b>4.</b> | <b>X-Ray Crystallographic Data for Compounds (<i>S</i>)-11 and (<i>R</i>)-11</b> | <b>S31</b> |
| <b>5.</b> | <b>Biological Data</b>                                                           | <b>S51</b> |
| <b>6.</b> | <b>References</b>                                                                | <b>S59</b> |
| <b>7.</b> | <b>NMR Spectra</b>                                                               | <b>S60</b> |

## 1. General Experimental Considerations

**<sup>1</sup>H-NMR Spectroscopy:** <sup>1</sup>H and <sup>13</sup>C NMR spectra were obtained using Varian VNMRS 300, 400, 500 and 600 MHz spectrometers at room temperature. Proton and carbon chemical shifts are quoted in ppm. <sup>1</sup>H NMR spectra were recorded using an internal deuterium lock for the residual protons in CDCl<sub>3</sub> (δ 7.26). <sup>13</sup>C NMR spectra were recorded using an internal deuterium lock in CDCl<sub>3</sub> (δ 77.0). Assignments were determined either on the basis of unambiguous chemical shift or coupling patterns, COSY, HSQC and/or NOESY experiments. Peak multiplicities are defined as: s = singlet, d = doublet, t = triplet, q = quartet, m = multiplet, br. = broad; coupling constants (*J*) are reported to the nearest 0.1 Hz.

**Infrared Spectroscopy:** Infrared spectra were recorded on a Varian 3100 FT-IR spectrometer with the sample being prepared as a thin film on a diamond ATR module. Absorption maxima ( $\nu_{\max}$ ) are quoted in wavenumbers (cm<sup>-1</sup>).

**Supercritical Fluid Chromatography:** SFC was performed on a Waters UPC<sup>2</sup> using a Chiralcel-IA3, IB3, IC3 or ID3 column.

**Mass Spectrometry:** High-resolution mass spectra (HRMS) were recorded using a Waters Micromass LCT time-of-flight mass spectrometer.

**Optical Rotation:** Optical rotation measurements were recorded using a Schmidt-Haensch Unipol L2000 polarimeter at 589 nm and are quoted in units of deg cm<sup>3</sup>dm<sup>-1</sup>g<sup>-1</sup>.

**X-Ray Crystallography:** Crystal data were collected using a Rigaku Oxford Diffraction (former Agilent Technologies, former Oxford Diffraction) SuperNova A diffractometer. A full sphere of the reciprocal space was scanned by phi-omega scans. Pseudoempirical absorption correction based on the redundant reflections was performed by the program SADABS (X-1). The structures were solved by direct methods using SHELXS-97 (X2) and refined by full matrix least-squares on F<sup>2</sup> for all data using SHELXS-97 (X-3). All hydrogen atoms were added at calculated positions and refined using a riding model. Their isotropic temperature factors were fixed to 1.2 times (1.5 times for methyl groups) the equivalent isotropic displacement parameters of the carbon atom that the H-atom is attached to. Anisotropic temperature factors were used for all non-hydrogen atoms. Friedel opposites were merged in the refinement.

**Reagents, Solvents and Techniques:** Reagents were purchased from Sigma-Aldrich, Fischer, Acros or Fluorochem and used without further purification unless otherwise stated. Dry tetrahydrofuran was obtained from a Puresol Grubbs system unless otherwise stated. When appropriate, reactions were performed under a nitrogen atmosphere with oven dried glassware. Oxygen free nitrogen was supplied by BOC gases and used without further drying. Column chromatography was performed with Merck Kieselgel 60 F254 (230-400 mesh) silica gel. Thin-layer chromatography was performed on aluminium sheets pre-coated plates with silica gel 60 F<sub>254</sub>, or aluminium oxide 60 F<sub>254</sub>. The plates were realised with ultraviolet fluorescence. Solvent was removed from solutions using a Büchi rotary evaporator with an integrated vacuum pump.

## 2. Experimental Procedures and Characterization Data

Scheme S1. Synthesis of “upper chain” coupling partner **10**.<sup>1</sup>

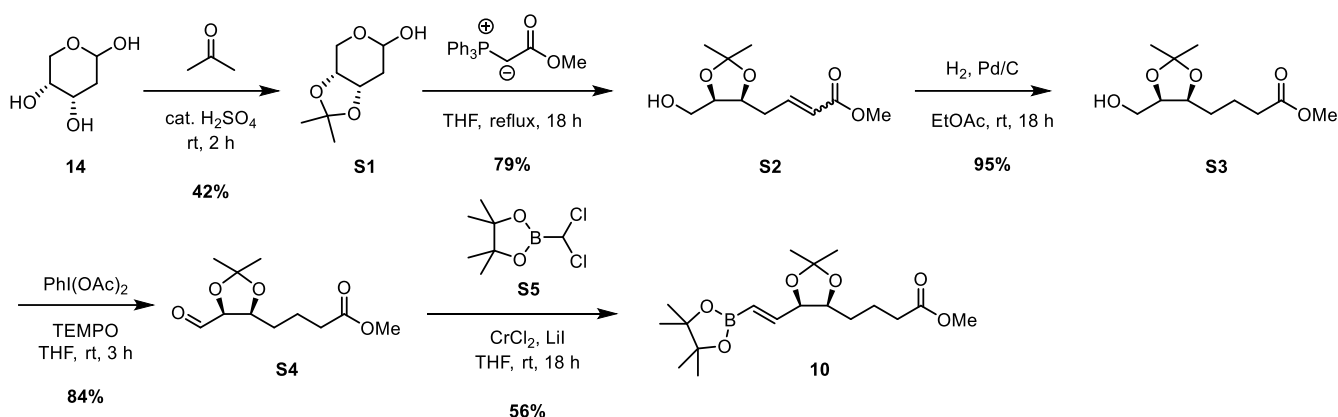

### (3*aR*,7*aS*)-2,2-dimethyltetrahydro-4*H*-[1,3]dioxolo[4,5-*c*]pyran-6-ol (S1)

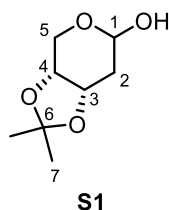

To a flask equipped with stirrer bar was suspended 2-deoxy-D-ribose (5.00 g, 37.28 mmol) in acetone (125 mL). Conc. H<sub>2</sub>SO<sub>4</sub> (3 drops) was added and the resulting mixture was stirred at rt for 2 h. NaHCO<sub>3</sub> was added until the pH was ~ 7, after which the solution was filtered and concentrated *in vacuo*. Purification by column chromatography (SiO<sub>2</sub>, cyclohexane/EtOAc, 1:1) afforded the desired product as a pale yellow oil (2.76 g, 42%). The product was isolated as a mixture of  $\alpha$ - and  $\beta$ - anomers in a ratio of approx. 2:1.

*Minor diastereomer:*

<sup>1</sup>H NMR (400 MHz, CDCl<sub>3</sub>)  $\delta$  5.10 – 5.02 (1H, m, H1), 4.40 (1H, dt, *J* = 5.8, 4.7 Hz, H3), 4.23 – 4.11 (1H, m, H4), 3.97 – 3.94 (1H, m, H5), 3.90 (1H, broad s, -OH), 3.73 – 3.66 (1H, m, H5), 2.15 – 1.99 (2H, m, H2), 1.56 (3H, s, H7), 1.35 (3H, s, H7). <sup>13</sup>C NMR (101 MHz, CDCl<sub>3</sub>)  $\delta$  109.5, 91.6, 71.3, 70.8, 60.8, 32.5, 28.1, 25.7.

*Major diastereomer:*

**<sup>1</sup>H NMR** (400 MHz, CDCl<sub>3</sub>) δ 5.25 (1H, dd, *J* = 7.1, 4.3 Hz, H1), 4.47 (1H, dt, *J* = 6.6, 4.3 Hz, H3), 4.23 – 4.11 (1H, m, H4), 3.94 – 3.91 (1H, m, H5), 3.74 – 3.65 (1H, m, H5), 3.04 (1H, broad s, -OH), 2.23 (1H, dt, *J* = 14.8, 4.3 Hz, H2), 1.77 (ddd, *J* = 14.8, 7.1, 4.3 Hz, H2), 1.49 (3H, s, H7), 1.34 (3H, s, H7). **<sup>13</sup>C NMR** (101 MHz, CDCl<sub>3</sub>) δ 108.9, 91.1, 71.8, 70.5, 62.2, 32.3, 27.4, 25.5.

*Spectroscopic data in agreement with those previously reported.*<sup>1</sup>

**methyl-4-((4*S*,5*R*)-5-(hydroxymethyl)-2,2-dimethyl-1,3-dioxolan-4-yl)but-2-enoate (S2)**

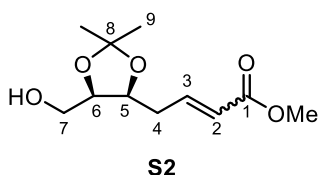

To a round-bottom flask was added **S1** (2.46 g, 14.1 mmol) and methyl (triphenylphosphoranylidene)acetate (5.67 g, 17.0 mmol) in dry THF (45 mL). The resulting mixture was refluxed at 66 °C in an oil bath for 18 h. The solution was then concentrated *in vacuo* and the residue was re-dissolved in EtOAc (20 mL). The resulting solution was washed with H<sub>2</sub>O (2 x 20 mL) and brine (20 mL) then dried over MgSO<sub>4</sub>, filtered, and concentrated *in vacuo*. Purification by column chromatography (SiO<sub>2</sub>, cyclohexane/EtOAc, 3:2) afforded the desired product as a yellow oil (2.57 g, 79%). The product was obtained as a mixture of geometric isomers with an *E/Z* ratio of approx. 5:1.

**R<sub>f</sub>** = 0.24 (cyclohexane/EtOAc 3:2)[KMnO<sub>4</sub>]

*E-isomer:*

**<sup>1</sup>H NMR** (400 MHz, CDCl<sub>3</sub>) δ 6.97 (1H, dt, *J* = 15.8, 6.9 Hz, H3), 5.93 (1H, dt, *J* = 15.8, 1.6 Hz, H2), 4.34 – 4.25 (1H, m, H5), 4.24 – 4.13 (1H, m, H6), 3.72 (3H, s, -OMe), 3.65 (2H, t, *J* = 5.7 Hz, 2H) 2.58 – 2.48 (1H, m, H4), 2.48 – 2.39 (1H, m, H4), 1.96 (1H, dd, *J* = 6.3, 5.7 Hz, -OH), 1.47 (3H, s, H9), 1.35 (3H, s, H9). **<sup>13</sup>C NMR** (101 MHz, CDCl<sub>3</sub>) δ 166.6, 144.8, 123.2, 108.5, 77.5, 75.3, 61.4, 51.5, 32.4, 27.9, 25.3.

*Z-isomer:*

**<sup>1</sup>H NMR** (400 MHz, CDCl<sub>3</sub>) δ 6.35 (1H, ddd, *J* = 11.5, 7.9, 6.6 Hz, H3), 5.88 (1H, dt, *J* = 11.5, 1.8 Hz, H2), 4.32 – 4.25 (1H, m, H5), 4.24 – 4.17 (1H, m, H6), 3.70 (3H, s, -OMe), 3.70 – 3.66 (2H, m, H7), 3.07 (1H, dddd, *J* = 15.6, 7.9, 4.1, 1.8 Hz, H4), 2.79 (1H, dddd, *J* = 15.6, 9.3, 6.6, 1.8 Hz, H4), 2.04 (1H, t, *J* = 6.1 Hz, -OH), 1.47 (3H, s, H9), 1.35 (3H, s, H9). **<sup>13</sup>C NMR** (101 MHz, CDCl<sub>3</sub>) δ 166.7, 146.0, 120.9, 108.5, 77.8, 76.3, 61.5, 51.2, 29.2, 28.0, 25.4.

*Spectroscopic data in agreement with those previously reported.*<sup>1</sup>

**methyl 4-((4*S*,5*R*)-5-(hydroxymethyl)-2,2-dimethyl-1,3-dioxolan-4-yl)butanoate (**S3**)**

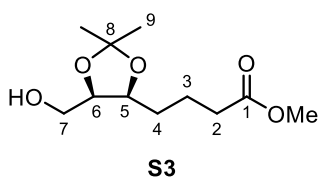

To a round-bottom flask was added **S2** (2.67 g, 11.6 mmol) in EtOAc (20 mL). Pd/C (~10 wt %, 1.2 g) was added and the flask was stoppered. The flask was evacuated and the reaction mixture was placed under an atmosphere of H<sub>2</sub> gas using a balloon. The resulting mixture was stirred at rt for 18 h. The mixture was then filtered through a plug of silica and concentrated *in vacuo* to afford the desired compound as a yellow oil (2.57 g, 95%).

**R<sub>f</sub>** = 0.28 (CyHex/EtOAc, 3:2) [KMnO<sub>4</sub>] **<sup>1</sup>H NMR** (400 MHz, CDCl<sub>3</sub>) δ 4.21 – 4.09 (2H, m, H5, H6), 3.66 (3H, s, -OMe), 3.64 – 3.56 (2H, m, H7), 2.46 – 2.27 (2H, m, H2), 1.97 (1H, dd, *J* = 7.0, 5.2 Hz, -OH), 1.91 – 1.78 (1H, m, H3), 1.77 – 1.65 (1H, m, H3), 1.64 – 1.48 (2H, m, H4), 1.45 (3H, s, H9), 1.38 – 1.30 (3H, m, H9). **<sup>13</sup>C NMR** (101 MHz, CDCl<sub>3</sub>) δ 174.0, 108.3, 78.0, 76.8, 61.8, 51.7, 33.8, 28.5, 28.3, 25.6, 22.3.

*Spectroscopic data in agreement with those previously reported.*<sup>1</sup>

**methyl 4-((4S,5S)-5-formyl-2,2-dimethyl-1,3-dioxolan-4-yl)butanoate (S4)**

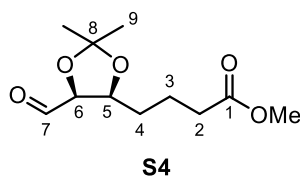

To a round-bottom flask was added **S3** (2.57 g, 11.1 mmol) in CH<sub>2</sub>Cl<sub>2</sub> (30 mL). TEMPO (0.170 g, 1.11 mmol) and (diacetoxyiodo)benzene (4.28 g, 13.3 mmol) were added to the flask in a single portion. The resulting mixture was stirred vigorously at rt for 3 h. The solution was then concentrated *in vacuo*. Purification by column chromatography (SiO<sub>2</sub>, cyclohexane/EtOAc, 4:1) afforded the desired compound as an orange oil (2.13 g, 84%).

**R<sub>f</sub>** = 0.24 (cyclohexane/EtOAc, 4:1) [KMnO<sub>4</sub>] **<sup>1</sup>H NMR** (400 MHz, CDCl<sub>3</sub>) δ 9.64 (1H, dd, *J* = 3.3, 0.7 Hz, H7), 4.38 – 4.30 (1H, m, H5), 4.26 (1H, dd, *J* = 7.1, 3.3 Hz, H6), 3.67 (3H, s, -OMe), 2.35 (2H, t, *J* = 7.4 Hz, H2), 1.91 – 1.78 (1H, m, H3), 1.77 – 1.68 (1H, m, H3), 1.68 – 1.56 (1H, m, H4), 1.56 – 1.45 (1H, m, H4), 1.58 (3H, s, H9), 1.41 (3H, s, H9). **<sup>13</sup>C NMR** (101 MHz, CDCl<sub>3</sub>) δ 202.0, 173.4, 110.5, 81.8, 78.1, 51.4, 33.3, 29.0, 27.4, 25.1, 21.8.

*Spectroscopic data in agreement with those previously reported.*<sup>1</sup>

## 2-(dichloromethyl)-4,4,5,5-tetramethyl-1,3,2-dioxaborolane (S5)

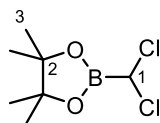

S5

To a flame-dried two-necked flask under N<sub>2</sub> was added dry dichloromethane (3.2 mL, 50.0 mmol) in dry THF (70 mL). The solution was cooled to -100 °C and *n*-BuLi (2.5 M in hexanes, 20.0 mL, 50.0 mmol) was added dropwise over 20 min. The resulting mixture was stirred at -100 °C for 30 min. Trimethylborate (5.77 mL, 50.0 mmol) was added in a single portion and the resulting mixture was stirred at -100 °C for a further 30 min. HCl (5 M, 50 mL) was added and the mixture was stirred vigorously and allowed to warm to rt. The product was extracted into Et<sub>2</sub>O (3 x 50 mL), and the combined organic layers were dried over MgSO<sub>4</sub>, filtered, and concentrated *in vacuo*. The residue was then dissolved in toluene (70 mL) and transferred to a flame-dried two-necked flask under N<sub>2</sub>. With backflow of N<sub>2</sub>, pinacol (5.91 g, 50.0 mmol) was added and the resulting mixture was stirred under reflux for 48 h. The resulting solution was concentrated *in vacuo*. Purification by reduced pressure distillation (b.p. 64 – 66 °C, 0.2 mbar) afforded the desired compound as a colorless oil (6.47 g, 61%).

<sup>1</sup>H NMR (400 MHz, CDCl<sub>3</sub>) δ 5.34 (1H, s, H1), 1.33 (12H, s, H3). <sup>13</sup>C NMR (101 MHz, CDCl<sub>3</sub>) δ 85.9, 24.6, (C1 gives a very broad signal between δ 57.5 and 52.2 barely detectable above the baseline).

*Spectroscopic data in agreement with those previously reported.*<sup>1</sup>



**methyl 4-((4S,5R)-2,2-dimethyl-5-((E)-2-(4,4,5,5-tetramethyl-1,3,2-dioxaborolan-2-yl)vinyl)-1,3-dioxolan-4-yl)butanoate (10)**

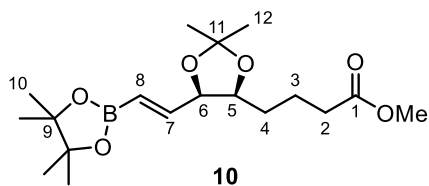

To a flame-dried Schlenk tube under  $N_2$  was added **S4** (1.56 g, 6.77 mmol) and boronic ester **S5** (2.86 g, 13.6 mmol) in dry THF (70 mL). A solution of LiI (3.63 g, 27.1 mmol) in dry THF (20 mL) was added to the mixture dropwise. With backflow of  $N_2$ ,  $CrCl_2$  (5.00 g, 40.7 mmol) was added and the Schlenk tube immediately stoppered. The resulting mixture was stirred at rt for 18 h. The mixture was then poured onto ice water (100 mL) and extracted into dichloromethane (3 x 100 mL). The combined organic layers were dried over  $MgSO_4$ , filtered and concentrated *in vacuo*. Purification by column chromatography ( $SiO_2$ , cyclohexane/EtOAc, 9:1) afforded the desired compound as a pale yellow oil (1.34 g, 56%).

$R_f$  = 0.29 (cyclohexane/EtOAc, 4:1) [PMA]  $^1H$  NMR (400 MHz,  $CDCl_3$ )  $\delta$  6.47 (1H, dd,  $J$  = 18.0, 6.8 Hz, H7), 5.69 (1H, dd,  $J$  = 18.0, 1.3 Hz, H8), 4.52 (1H, td,  $J$  = 6.4, 1.2 Hz, H6), 4.15 (1H, ddd,  $J$  = 9.2, 6.4, 4.4 Hz, H5), 3.65 (3H, s, -OMe), 2.34 (2H, td,  $J$  = 7.6, 1.9 Hz, H2), 1.87 – 1.73 (1H, m, H3), 1.72 – 1.59 (1H, m, H3), 1.55 – 1.37 (2H, m, H4), 1.47 (3H, s, H12), 1.34 (3H, s, H12), 1.25 (12H, s, H10).  $^{13}C$  NMR (101 MHz,  $CDCl_3$ )  $\delta$  173.9, 148.1, 121.9 (br), 108.6, 83.5, 80.5, 78.1, 51.6, 33.9, 30.0, 28.2, 25.8, 24.9, 24.8, 21.9.

*Spectroscopic data in agreement with those previously reported.*<sup>1</sup>

### [1.1.1]propellane (13)

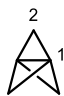

13

According to the procedure described by Gianatassio *et al.*<sup>2</sup> To a flame-dried flask equipped with a stirrer bar was added 1,1-dibromo-2,2-bis(chloromethyl)cyclopropane (14.0 g, 47.2 mmol). The reaction vessel was placed under N<sub>2</sub>, and anhydrous Et<sub>2</sub>O (30 mL) was added. The reaction vessel was cooled to -45 °C. Phenyllithium (1.9 M in Bu<sub>2</sub>O, 50.0 mL, 94.3 mmol) was added dropwise over 15 min at -45 °C, and the resulting mixture was stirred for 15 min at -45 °C. The cooling bath was replaced with an ice bath, and the reaction mixture was warmed to 0 °C and stirred at this temperature for 2 h. The mixture was then distilled at room temperature using a rotary evaporator, the receiving flask of which was immersed in a dry ice/acetone bath. The distillate was transferred in a flame-dried septum-sealed bottle under inert atmosphere, and stored at -20 °C. The approximate yield was determined by <sup>1</sup>H NMR spectroscopy with 1,2-dichloroethane as an internal standard. The concentration of the [1.1.1]propellane solution ranged between 0.62 M and 1.10 M, with yields of 45-61%.

<sup>1</sup>H NMR (300 MHz, CDCl<sub>3</sub>) δ 1.94 (6H, s, H<sub>2</sub>).

*Spectroscopic data in agreement with those previously reported.*<sup>2</sup>

## 1-(2-bromophenyl)-2-iodoethan-1-one (12)

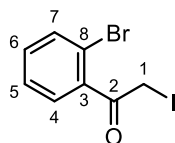

12

To a flask containing the 2'-bromoacetophenone (1.00 mL, 7.44 mmol) in MeCN (30 mL) was added N-bromosuccinimide (1.46 g, 8.18 mmol) and *p*-toluenesulfonic acid (1.41 g, 8.18 mmol). The resulting mixture was stirred at 80 °C in an oil bath for 18 h. After cooling to rt, the mixture was concentrated *in vacuo*. NaHCO<sub>3</sub> (aq. sat., 40 mL) was added and the product was extracted into dichloromethane (3 x 30 mL). The combined organic layers were dried over MgSO<sub>4</sub>, filtered and concentrated *in vacuo*. The residue was dissolved in acetone (30 mL) and sodium iodide (1.23 g, 8.18 mmol) was added. The mixture was stirred at rt for 30 min. Water (30 mL) was added and the product was extracted into dichloromethane (3 x 10 mL). The combined organic layers were dried over MgSO<sub>4</sub>, filtered, and concentrated *in vacuo*. Purification by column chromatography (SiO<sub>2</sub>, cyclohexane/Et<sub>2</sub>O, 19:1) afforded the desired compound as a pale yellow oil (1.64 g, 68%).

**R<sub>f</sub>** = 0.28 (cyclohexane/Et<sub>2</sub>O, 19:1) [UV/KMnO<sub>4</sub>] **<sup>1</sup>H NMR** (400 MHz, CDCl<sub>3</sub>) δ 7.62 (1H, dd, *J* = 7.7, 1.4 Hz, H7), 7.50 (1H, dd, *J* = 7.6, 1.8 Hz, H4), 7.42 – 7.30 (2H, m, H5, H6), 4.42 (2H, s, H1). **<sup>13</sup>C NMR** (101 MHz, CDCl<sub>3</sub>) δ 196.3, 138.6, 133.8, 132.5, 130.3, 127.6, 119.3, 6.1.

*Spectroscopic data in agreement with those previously reported.*<sup>3</sup>

**2-(bicyclo[1.1.1]pentan-1-yl)-1-(2-bromophenyl)ethan-1-one (9)** and **2-(bicyclo[1.1.1]pentan-1-yl)-1-phenylethan-1-one (18)**

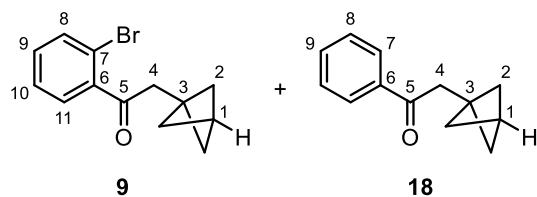

To a flask containing **12** (0.650 g, 2.00 mmol) in Et<sub>2</sub>O (2 mL) was added [1.1.1]propellane (0.55 M in Et<sub>2</sub>O, 4.73 mL, 2.60 mmol). Triethylborane (1.0 M in hexanes, 0.20 mL, 0.20 mmol) was syringed directly into the solution and the resulting mixture was stirred at rt for 90 min. The solution was concentrated *in vacuo* to afford crude **17** which was immediately dissolved in dichloromethane (5 mL). Tris(trimethylsilyl)silane (0.80 mL, 2.60 mmol) was added followed by triethylborane (1.0 M in hexanes, 0.20 mL, 0.20 mmol) and the resulting mixture was stirred at rt for 30 min. More triethylborane (1.0 M in hexanes, 0.20 mL, 0.20 mmol) was added and the mixture was stirred at rt for a further 1 h. The mixture was then washed with NaHCO<sub>3</sub> (aq. sat., 3 x 5 mL) and the organic layer was dried over MgSO<sub>4</sub>, filtered, and concentrated *in vacuo*. Purification by column chromatography (SiO<sub>2</sub>, cyclohexane/Et<sub>2</sub>O, 49:1) afforded the product as a colorless oil. The product was obtained as a 2.5:1 mixture of the **9** (~0.147 g, 28%) to **18** (~0.042 g, 11%).

*Mixture*: **R<sub>f</sub>** = 0.52 (pentane/Et<sub>2</sub>O, 9:1) [UV/PMA] **IR** (film)  $\nu_{\max}/\text{cm}^{-1}$  2967, 2907, 2871, 1695, 1587, 1428, 1288, 1257, 1218, 1200, 1000, 765, 621.

*Compound 9*: **<sup>1</sup>H NMR** (400 MHz, CDCl<sub>3</sub>)  $\delta$  7.60 (1H, ddd,  $J = 7.9, 1.1, 0.6$  Hz, H8), 7.41 – 7.32 (2H, m, H10, H11), 7.28 (1H, ddd,  $J = 7.9, 6.6, 2.5$  Hz, H9), 3.11 (2H, s, H4), 2.46 (1H, s, H1), 1.78 (6H, s, H2). **<sup>13</sup>C NMR** (101 MHz, CDCl<sub>3</sub>)  $\delta$  202.5, 141.9, 134.0, 131.7, 129.0, 127.5, 119.2, 51.8, 45.9, 41.3, 28.9. **HRMS** (ESI) [M+H]<sup>+</sup> calc. 265.0223 for [C<sub>13</sub>H<sub>14</sub><sup>79</sup>BrO]<sup>+</sup>; found 265.0222, calc. 267.0203 for [C<sub>13</sub>H<sub>14</sub><sup>81</sup>BrO]<sup>+</sup>; found 267.0202.

*Compound 23*: **<sup>1</sup>H NMR** (400 MHz, CDCl<sub>3</sub>)  $\delta$  7.94 – 7.87 (2H, m, H7), 7.58 – 7.51 (1H, m, H9), 7.49 – 7.42 (2H, m, H8), 3.11 (2H, s, H4), 2.47 (1H, s, H1), 1.78 (6H, s, H2). **<sup>13</sup>C NMR** (101 MHz, CDCl<sub>3</sub>)  $\delta$  198.9, 137.4, 133.1, 128.7, 128.6, 119.2, 51.8, 42.3, 41.6, 28.5.

**methyl 4-((4*S*,5*R*)-5-((*E*)-2-(2-(bicyclo[1.1.1]pentan-1-yl)acetyl)styryl)-2,2-dimethyl-1,3-dioxolan-4-yl)butanoate (**7**)**

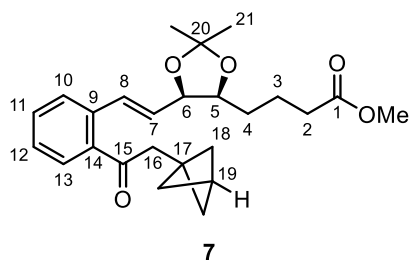

To a microwave vial was added **10** (0.162 g, 0.457 mmol) and **9** (0.146 g, 0.549 mmol) in 1,2-dimethoxyethane (2 mL). Pd(PPh<sub>3</sub>)<sub>4</sub> (0.0264 g, 0.0229 mmol) was added followed by K<sub>2</sub>CO<sub>3</sub> (2.0 M in H<sub>2</sub>O, 0.46 mL, 0.92 mmol). The vial was placed in a microwave reactor and heated at 125 °C for 50 min. The mixture was then diluted with dichloromethane (10 mL) and washed with H<sub>2</sub>O (2 x 10 mL) and brine (10 mL). The organic layer was dried over MgSO<sub>4</sub>, filtered and concentrated *in vacuo*. Purification by column chromatography (SiO<sub>2</sub>, cyclohexane/EtOAc, 9:1) afforded the desired compound as a pale yellow oil (0.116 g, 62%).

**R<sub>f</sub>** = 0.11 (cyclohexane/EtOAc, 9:1) [UV/PMA] **<sup>1</sup>H NMR** (400 MHz, CDCl<sub>3</sub>) δ 7.59 – 7.50 (2H, m, H10, H13), 7.43 (1H, td, *J* = 7.4, 0.9 Hz, H11), 7.32 (1H, td, *J* = 7.6, 1.3 Hz, H12), 7.06 (1H, d, *J* = 15.8 Hz, H8), 6.03 (1H, dd, *J* = 15.8, 8.2 Hz, H7), 4.69 (1H, ddd, *J* = 8.2, 6.2, 1.0 Hz, H6), 4.21 (1H, ddd, *J* = 8.9, 6.2, 4.5 Hz, H5), 3.63 (3H, s, -OMe), 3.03 (2H, s, H16), 2.45 (1H, s, H19), 2.34 (2H, t, *J* = 7.4 Hz, H2), 1.91 – 1.78 (1H, m, H3), 1.73 (6H, s, H18), 1.77 – 1.45 (3H, m, H3, H4), 1.52 (3H, s, H21), 1.39 (3H, s, H21). **<sup>13</sup>C NMR** (101 MHz, CDCl<sub>3</sub>) δ 203.0, 173.9, 138.1, 136.4, 132.2, 131.5, 128.8, 128.5, 127.9, 127.5, 108.5, 79.6, 78.5, 51.8, 51.6, 45.6, 41.7, 34.0, 30.1, 28.7, 28.5, 25.8, 21.9. **[α]<sub>D</sub>** = -9.29 ° (c = 1.09 g/100 cm<sup>3</sup>, CHCl<sub>3</sub>) **IR** (film) ν<sub>max</sub>/cm<sup>-1</sup> 2965, 2908, 2871, 1737, 1684, 1436, 1379, 1250, 1217, 1166. **HRMS** (ESI) [M+Na]<sup>+</sup> calc. 435.2142 for [C<sub>25</sub>H<sub>32</sub>O<sub>5</sub>Na]<sup>+</sup>; found 435.2145.

**methyl 4-((4*S*,5*R*)-5-((*E*)-2-((*S*)-2-(bicyclo[1.1.1]pentan-1-yl)-1-hydroxyethyl)styryl)-2,2-dimethyl-1,3-dioxolan-4-yl)butanoate (19a)**

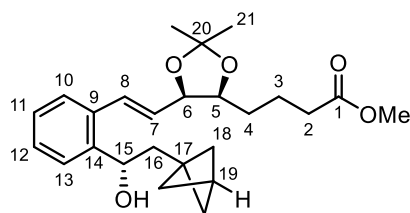

**19a**

To a flame-dried Schlenk tube under N<sub>2</sub> was added **7** (0.090 g, 0.218 mmol) in dry Et<sub>2</sub>O (4 mL). The solution was cooled to -20 °C and (-)-DIP-chloride (0.126 g, 0.393 mmol) was added with backflow of N<sub>2</sub>. The resulting mixture was stirred at -20 °C for 72 h. Diethanolamine (1 mL) was then added and the mixture was stirred at rt for a further 4 h. Cyclohexane (5 mL) was added and the resulting suspension was filtered under suction. The residue was washed with Et<sub>2</sub>O (3 x 5 mL) and the filtrate was concentrated *in vacuo*. Purification by column chromatography (SiO<sub>2</sub>, cyclohexane/EtOAc, 4:1) afforded the desired compound as a pale yellow oil (0.064 g, 71%, *dr* 99:1).

**R<sub>f</sub>** = 0.25 (cyclohexane/EtOAc, 4:1) [UV/PMA] **<sup>1</sup>H NMR** (400 MHz, CDCl<sub>3</sub>) δ 7.47 (1H, dd, *J* = 7.6, 1.5 Hz, H13), 7.41 (1H, dd, *J* = 7.5, 1.6 Hz, H10), 7.31 – 7.18 (2H, m, H11, H12), 6.92 (1H, d, *J* = 15.6 Hz, H8), 6.01 (1H, dd, *J* = 15.6, 7.7 Hz, H7), 5.03 (1H, t, *J* = 6.5 Hz, H15), 4.69 (1H, ddd, *J* = 7.7, 6.2, 1.1 Hz, H6), 4.21 (1H, ddd, *J* = 8.6, 6.2, 4.9 Hz, H5), 3.61 (3H, s, -OMe), 2.46 (1H, s, H19), 2.42 – 2.26 (2H, m H2), 2.03 (1H, s, -OH), 1.90 – 1.83 (2H, m, H16), 1.91 – 1.75 (1H, m, H3), 1.72 (6H, s, H18), 1.78 – 1.63 (1H, m, H3), 1.65 – 1.42 (2H, m, H4), 1.53 (3H, s, H21), 1.40 (3H, s, H21). **<sup>13</sup>C NMR** (101 MHz, CDCl<sub>3</sub>) δ 174.0, 142.0, 134.3, 130.2, 128.3, 128.2, 127.6, 126.7, 125.8, 108.5, 79.6, 78.4, 69.6, 51.7, 51.3, 43.7, 41.0, 33.9, 30.2, 28.5, 28.4, 25.8, 21.8. **[α]<sub>D</sub>** = -32.74 ° (*c* = 1.07 g/100 cm<sup>3</sup>, CHCl<sub>3</sub>). **IR** (film)  $\nu_{\text{max}}$ /cm<sup>-1</sup> 3467 (broad), 2959, 2906, 2868, 1737, 1479, 1379, 1246, 1216, 1166, 1044, 970, 759. **HRMS** (ESI) [M+Na]<sup>+</sup> calc. 437.2298 for [C<sub>25</sub>H<sub>34</sub>O<sub>5</sub>Na]<sup>+</sup>; found 437.2304. *dr* = 99:1 as determined by SFC (chiralpak ID column, sCO<sub>2</sub>:0.2% NH<sub>4</sub>OH in MeOH, 99:1 for 0 – 1 min, gradient to 40:60 for 1 – 5 min, 3.00 mL/min, T = 35 °C); R<sub>T</sub> = 3.00 min [(*S*)-major], R<sub>T</sub> = 3.32 min [(*R*)-minor].

**methyl 4-((4*S*,5*R*)-5-((*E*)-2-((*R*)-2-(bicyclo[1.1.1]pentan-1-yl)-1-hydroxyethyl)styryl)-2,2-dimethyl-1,3-dioxolan-4-yl)butanoate (**19b**)**

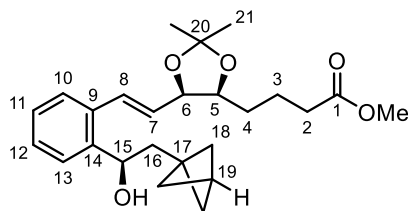

**19b**

To a flame-dried Schlenk tube under N<sub>2</sub> was added **7** (0.116 g, 0.281 mmol) in dry Et<sub>2</sub>O (5 mL). The solution was cooled to -20 °C and (+)-DIP-chloride (0.162 g, 0.506 mmol) was added with backflow of N<sub>2</sub>. The resulting mixture was stirred at -20 °C for 72 h. Diethanolamine (1 mL) was then added and the mixture was stirred at rt for a further 4 h. Cyclohexane (5 mL) was added and the resulting suspension was filtered under suction. The residue was washed with Et<sub>2</sub>O (3 x 5 mL) and the filtrate was concentrated *in vacuo*. Purification by column chromatography (SiO<sub>2</sub>, cyclohexane/EtOAc, 4:1) afforded the desired compound as a pale yellow oil (0.075 g, 64%, *dr* 98:2).

**<sup>1</sup>H NMR** (400 MHz, CDCl<sub>3</sub>) δ 7.46 (1H, dd, *J* = 7.6, 1.6 Hz, H13), 7.41 (1H, dd, *J* = 7.5, 1.6 Hz, H10), 7.32 – 7.19 (2H, m, H11, H12), 6.93 (1H, d, *J* = 15.7 Hz, H8), 6.00 (1H, dd, *J* = 15.7, 7.7 Hz, H7), 5.02 (1H, dd, *J* = 8.3, 4.5 Hz, H15), 4.69 (1H, ddd, *J* = 7.7, 6.2, 1.1 Hz, H6), 4.22 (1H, ddd, *J* = 8.9, 6.2, 4.6 Hz, H5), 3.63 (3H, s, -OMe), 2.47 (1H, s, H19), 2.39 – 2.29 (2H, m, H2), 2.00 (1H, s, -OH), 1.97 – 1.77 (3H, m, H3, H16), 1.72 (6H, d, *J* = 2.1 Hz, H18), 1.77 – 1.63 (1H, m, H3), 1.64 – 1.42 (2H, m, H4), 1.53 (3H, s, H21), 1.40 (3H, s, H21). **<sup>13</sup>C NMR** (101 MHz, CDCl<sub>3</sub>) δ 173.9, 142.0, 134.4, 130.5, 128.3, 128.2, 127.6, 126.9, 125.8, 108.5, 79.6, 78.5, 70.0, 51.7, 51.3, 43.7, 41.2, 34.0, 30.3, 28.5, 28.4, 25.8, 21.9. [ $\alpha$ ]<sub>D</sub> = +70.92 ° (c = 1.21 g/100 cm<sup>3</sup>, CHCl<sub>3</sub>). **IR** (film)  $\nu_{\text{max}}$ /cm<sup>-1</sup> 3467 (broad), 2959, 2906, 2868, 1737, 1479, 1379, 1245, 1215, 1166, 1044, 970, 759. **HRMS** (ESI) [M+Na]<sup>+</sup> calc. 437.2298 for [C<sub>25</sub>H<sub>34</sub>O<sub>5</sub>Na]<sup>+</sup>; found 437.2299. *dr* = 49:1 as determined by SFC (chiralpak ID column, sCO<sub>2</sub>:0.2% NH<sub>4</sub>OH in MeOH, 99:1 for 0 – 1 min, gradient to 40:60 for 1 – 5 min, 3.00 mL/min, T = 35 °C); R<sub>T</sub> = 2.95 min [(*S*)-minor], R<sub>T</sub> = 3.27 min [(*R*)-major].

**methyl (5*S*,6*R*,*E*)-8-(2-((*S*)-2-(bicyclo[1.1.1]pentan-1-yl)-1-hydroxyethyl)phenyl)-5,6-dihydroxyoct-7-enoate (5a)**

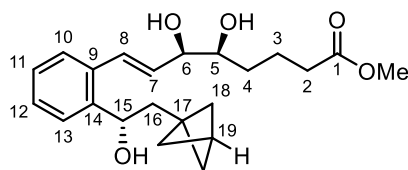

**5a**

To a vial containing **19a** (0.031 g, 0.075 mmol) in MeOH (2 mL) was added camphorsulfonic acid (0.017 g, 0.075 mmol) and the resulting mixture was stirred at rt for 3 h. The solution was then concentrated *in vacuo* at room temperature. Purification by column chromatography (SiO<sub>2</sub>, EtOAc/cyclohexane, 3:2) afforded the desired compound as a pale yellow oil (0.0125 g, 45%).

**R<sub>f</sub>** = 0.20 (EtOAc/cyclohexane, 3:2) [UV/PMA] **<sup>1</sup>H NMR** (500 MHz, CDCl<sub>3</sub>) δ 7.46 – 7.38 (2H, m, H10, H13), 7.31 – 7.19 (2H, m, H11, H12), 6.98 (1H, d, *J* = 15.8 Hz, H8), 6.10 (1H, dd, *J* = 15.8, 6.9 Hz, H7), 5.01 (1H, dd, *J* = 7.8, 5.2 Hz, H15), 4.27 (1H, ddd, *J* = 6.9, 3.8, 1.3 Hz, H6), 3.76 (1H, dt, *J* = 8.9, 3.8 Hz, H5), 3.65 (3H, s, -OMe), 2.45 (1H, s, H19), 2.40 – 2.31 (2H, m, H2), 1.95 – 1.78 (3H, m, H3, H16), 1.77 – 1.63 (1H, m, H3), 1.70 (6H, s, H18), 1.58 – 1.42 (2H, m, H4). **<sup>13</sup>C NMR** (126 MHz, CDCl<sub>3</sub>) δ 174.4, 141.7, 134.6, 130.2, 129.9, 128.1, 127.7, 126.8, 126.0, 76.0, 74.1, 70.0, 51.8, 51.3, 43.6, 40.9, 33.9, 31.6, 28.4, 21.2. [**α**]<sub>D</sub> = -8.84° (c = 1.25 g/100 cm<sup>3</sup>, CHCl<sub>3</sub>). **IR** (film)  $\nu_{\max}$ /cm<sup>-1</sup> 3397 (broad), 2958, 2925, 2868, 1720, 1438, 1197, 1049, 1006, 970, 759. **HRMS** (ESI) [M+Na]<sup>+</sup> calc. 397.1985 for [C<sub>22</sub>H<sub>30</sub>O<sub>5</sub>Na]<sup>+</sup>; found 397.1991.



**methyl (5*S*,6*R*,*E*)-8-(2-((*R*)-2-(bicyclo[1.1.1]pentan-1-yl)-1-hydroxyethyl)phenyl)-5,6-dihydroxyoct-7-enoate (5b)**

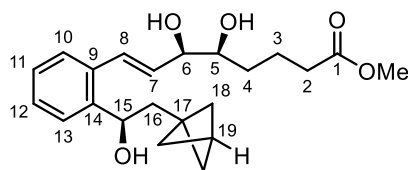

**5b**

To a vial containing **19b** (0.032 g, 0.077 mmol) in MeOH (2 mL) was added camphorsulfonic acid (0.018 g, 0.077 mmol) and the resulting mixture was stirred at rt for 3 h. The solution was then concentrated *in vacuo* at room temperature. Purification by column chromatography (SiO<sub>2</sub>, EtOAc/cyclohexane, 3:2) afforded the desired compound as a pale yellow oil (0.0075 g, 26%).

**R<sub>f</sub>** = 0.20 (EtOAc/cyclohexane, 3:2) [UV/PMA] **<sup>1</sup>H NMR** (500 MHz, CDCl<sub>3</sub>) δ 7.48 – 7.39 (2H, m, H10, H13), 7.32 – 7.21 (2H, m, H11, H12), 6.97 (1H, d, *J* = 15.8 Hz, H8), 6.12 (1H, dd, *J* = 15.8, 6.7 Hz, H7), 5.01 (1H, dd, *J* = 7.9, 5.0 Hz, H15), 4.27 (1H, dd, *J* = 6.7, 3.6 Hz, H6), 3.77 (1H, dt, *J* = 8.2, 3.6 Hz, H5), 3.65 (3H, s, -OMe), 2.46 (1H, s, H19), 2.39 – 2.33 (2H, m, H2), 1.94 – 1.81 (3H, m, H3, H16), 1.79 – 1.66 (1H, m, H3), 1.70 (6H, d, *J* = 1.3 Hz, H18), 1.58 – 1.42 (2H, m, H4). **<sup>13</sup>C NMR** (126 MHz, CDCl<sub>3</sub>) δ 174.3, 141.7, 134.6, 130.4, 129.9, 128.2, 127.7, 126.8, 125.8, 76.0, 74.0, 69.9, 51.8, 51.3, 43.6, 40.9, 33.9, 31.7, 28.4, 21.3. **[α]<sub>D</sub>** = +11.28 ° (c = 0.85 g/100 cm<sup>3</sup>, CHCl<sub>3</sub>). **IR** (film) ν<sub>max</sub>/cm<sup>-1</sup> 3396 (broad), 2959, 2924, 2868, 1721, 1438, 1197, 1051, 1005, 970, 759. **HRMS** (ESI) [M+Na]<sup>+</sup> calc. 397.1985 for [C<sub>22</sub>H<sub>30</sub>O<sub>5</sub>Na]<sup>+</sup>; found 397.1988.

#### 4,5-dibromo-1,2-dimethyl-1H-imidazole (21)

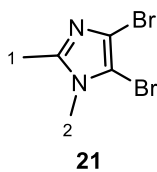

To a round-bottom flask was added 1,2-dimethylimidazole (2.50 g, 26.0 mmol) in  $\text{CHCl}_3$  (100 mL). N-Bromosuccinimide (10.20 g, 57.2 mmol) was added portionwise and the resulting mixture was stirred at rt for 24 h. HCl (5 M, 50 mL) was added and the organic layer was extracted into  $\text{H}_2\text{O}$  (3 x 50 mL). The combined aqueous layers were neutralized with NaOH (aq., 5 M, 50 mL) and the resulting suspension was collected via suction filtration. The residue was washed with  $\text{H}_2\text{O}$  (3 x 20 mL) and dried in vacuo for 24 h to afford the desired compound as a white solid (4.32 g, 65%).

**$^1\text{H NMR}$**  (400 MHz,  $\text{CDCl}_3$ )  $\delta$  3.52 (3H, s, H2), 2.38 (3H, s, H1).  **$^{13}\text{C NMR}$**  (101 MHz,  $\text{CDCl}_3$ )  $\delta$  145.7, 114.8, 103.1, 32.9, 14.3.

*Spectroscopic data in agreement with those previously reported.*<sup>4</sup>

**1-(1,2,4-trimethyl-1H-imidazol-5-yl)ethan-1-one (22)**

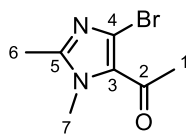

**22**

To a flame-dried Schlenk tube under N<sub>2</sub> was added **21** (2.00 g, 7.88 mmol) in dry THF (15 mL). The solution was cooled to -78 °C and *n*-BuLi (2.5 M in hexanes, 3.15 mL, 7.88 mmol) was added dropwise. The resulting mixture was stirred at -78 °C for 5 min then transferred via cannula to a round-bottom flask containing acetyl chloride (2.81 mL, 39.4 mmol) in dry THF (15 mL) pre-cooled to -78 °C. The resulting mixture was stirred at -78 °C for 1 h then warmed to rt and stirred for a further 1 h. EtOH (10 mL) was added and the mixture was stirred for 10 min. NaHCO<sub>3</sub> (aq. sat., 40 mL) was added and the product was extracted into dichloromethane (3 x 40 mL). The combined organic layers were dried over MgSO<sub>4</sub>, filtered, and concentrated *in vacuo*. Purification by column chromatography (SiO<sub>2</sub>, cyclohexane/EtOAc, 1:1) afforded the desired compound as a pale-yellow solid (1.64 g, 48%).

**R<sub>f</sub>** = 0.28 (Cyclohexane/EtOAc 2:3) [UV/KMnO<sub>4</sub>] **<sup>1</sup>H NMR** (400 MHz, CDCl<sub>3</sub>) δ 3.79 (3H, s, H7), 2.63 (3H, s, H1), 2.39 (3H, s, H6). **<sup>13</sup>C NMR** (101 MHz, CDCl<sub>3</sub>) δ 188.7, 150.1, 128.8, 123.8, 34.3, 30.8, 13.5.

*Spectroscopic data in agreement with those previously reported.*<sup>4</sup>

### 1-(4-bromo-1,2-dimethyl-1H-imidazol-5-yl)-2-iodoethan-1-one (15)

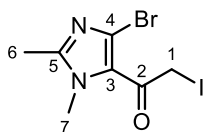

15

To a flask containing **27** (2.82 g, 13.0 mmol) in MeCN (50 mL) was added N-Bromosuccinimide (2.54 g, 14.3 mmol) and *p*-toluenesulfonic acid (3.36 g, 19.5 mmol). The resulting mixture was stirred at 80 °C in an oil bath for 18 h. After cooling to rt, the mixture was concentrated *in vacuo*. NaHCO<sub>3</sub> (aq. sat., 40 mL) was added and the product was extracted into dichloromethane (3 x 30 mL). The combined organic layers were dried over MgSO<sub>4</sub>, filtered and concentrated *in vacuo*. The residue was dissolved in acetone (50 mL) and sodium iodide (2.34 g, 15.6 mmol) was added. The mixture was stirred at rt for 30 min. Water (50 mL) was added and the product was extracted into dichloromethane (3 x 30 mL). The combined organic layers were dried over MgSO<sub>4</sub>, filtered and concentrated *in vacuo*. Purification by column chromatography (SiO<sub>2</sub>, cyclohexane/EtOAc, 1:1) afforded the desired compound as an orange solid (1.88 g, 42%).

**R<sub>f</sub>** = 0.22 (cyclohexane/EtOAc, 1:1) [UV/KMnO<sub>4</sub>] **<sup>1</sup>H NMR** (400 MHz, CDCl<sub>3</sub>) δ 4.50 (2H, s, H1), 3.80 (3H, s, H7), 2.44 (3H, s, H6). **<sup>13</sup>C NMR** (101 MHz, CDCl<sub>3</sub>) δ 183.5, 151.4, 125.9, 124.1, 34.5, 13.7, 6.7. **m.p.** = 61 – 62 °C (decomp.). **IR** (film) ν<sub>max</sub>/cm<sup>-1</sup> 1754, 1646, 1490, 1461, 1341, 1257, 1019, 982. **HRMS** (ESI) [M+H]<sup>+</sup> calc. 342.8938 for [C<sub>7</sub>H<sub>9</sub><sup>79</sup>Br<sup>127</sup>IN<sub>2</sub>O]<sup>+</sup>; found 342.8958, calc. 344.8917 for [C<sub>7</sub>H<sub>9</sub><sup>81</sup>Br<sup>127</sup>IN<sub>2</sub>O]<sup>+</sup>; found 344.8955.

**2-(bicyclo[1.1.1]pentan-1-yl)-1-(4-bromo-1,2-dimethyl-1H-imidazol-5-yl)ethan-1-one**  
**(24)**

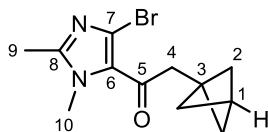

**24**

To a round-bottom flask containing **15** (1.00 g, 2.92 mmol) in Et<sub>2</sub>O (5 mL) was added [1.1.1]propellane (0.62 M in Et<sub>2</sub>O, 6.11 mL, 3.79 mmol). Triethylborane (1.0 M in hexanes, 0.29 mL, 0.29 mmol) was syringed directly into the mixture, the flask was stoppered, and the resulting mixture was stirred at rt for 90 min. The reaction mixture was then concentrated *in vacuo* to afford crude **23** which was immediately dissolved in dichloromethane (20 mL). Tris(trimethylsilyl)silane (1.17 mL, 3.79 mmol) was added followed by triethylborane (1.0 M in hexanes, 0.29 mL, 0.29 mmol) and the resulting mixture was stirred at rt for 30 min. More triethylborane (1.0 M in hexanes, 0.29 mL, 0.29 mmol) was added and the reaction was stirred for a further 1 h. The solution was then washed with NaHCO<sub>3</sub> (aq. sat., 3 x 10 mL), dried over Na<sub>2</sub>SO<sub>4</sub>, filtered, and concentrated *in vacuo*. Purification by column chromatography (SiO<sub>2</sub>, cyclohexane/EtOAc, 1:1) afforded the desired compound as a yellow oil (0.279 g, 34%).

**R<sub>f</sub>** = 0.34 (cyclohexane/EtOAc, 1:1) [UV/PMA] **<sup>1</sup>H NMR** (400 MHz, CDCl<sub>3</sub>) δ 3.77 (3H, s, H10), 3.21 (2H, s, H4), 2.47 (1H, s, H1), 2.38 (3H, s, H9), 1.81 (6H, s, H2). **<sup>13</sup>C NMR** (101 MHz, CDCl<sub>3</sub>) δ 189.9, 150.0, 128.8, 123.1, 51.8, 44.2, 41.7, 34.3, 29.0, 13.6. **IR** (film)  $\nu_{\text{max}}/\text{cm}^{-1}$  2966, 2907, 2871, 1652, 1488, 1464, 1362, 1252, 1228, 1194. **HRMS** (ESI) [M+H]<sup>+</sup> calc. 283.0441 for [C<sub>12</sub>H<sub>16</sub><sup>79</sup>BrN<sub>2</sub>O]<sup>+</sup>; found 283.0454, calc. 285.0421 for [C<sub>12</sub>H<sub>16</sub><sup>81</sup>BrN<sub>2</sub>O]<sup>+</sup>; found 285.0472.

**(S)-2-(bicyclo[1.1.1]pentan-1-yl)-1-(4-bromo-1,2-dimethyl-1H-imidazol-5-yl)ethan-1-ol**  
[(S)-11]

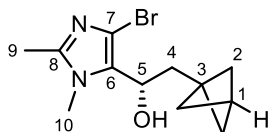

(S)-11

To a vial containing **24** (0.140 g, 0.494 mmol) in dry *i*-PrOH (3 mL) was added RuCl<sub>2</sub>[(*R*)-DM-BINAP][(*R*)-DAIPEN] (0.0302 g, 0.0247 mmol) followed by potassium *tert*-butoxide (0.055 g, 0.494 mmol). A few drops of triisopropyl borate were added and the vial was placed in a Parr hydrogenator. The hydrogenator was flushed with H<sub>2</sub> (3 x 20 bar) and the reaction mixture was stirred under H<sub>2</sub> (20 bar) at rt for 72 h. Water (5 mL) was then added and the product was extracted into dichloromethane (3 x 5 mL). The combined organic layers were dried over Na<sub>2</sub>SO<sub>4</sub>, filtered and concentrated *in vacuo*. Purification by column chromatography (SiO<sub>2</sub>, 100% EtOAc) afforded the desired product as a white solid (0.091 g, 65%). The product was recrystallized from CHCl<sub>3</sub> by vapour diffusion of pentane to afford crystals with 98% *ee* (0.069 g, 49%). Crystals suitable for X-ray diffraction were grown from CHCl<sub>3</sub> by slow vapour diffusion of pentane.

**R<sub>f</sub>** = 0.27 (100% EtOAc) [PMA] **<sup>1</sup>H NMR** (500 MHz, CDCl<sub>3</sub>) δ 4.87 (1H, td, *J* = 7.5, 3.1 Hz, H5), 3.62 (3H, s, H10), 2.43 (1H, s, H1), 2.34 (1H, d, *J* = 3.1 Hz, -OH), 2.31 (3H, s, H9), 2.11 (1H, dd, *J* = 14.3, 7.5 Hz, H4), 1.96 (1H, dd, *J* = 14.3, 7.5 Hz, H4), 1.69 (3H, dd, *J* = 9.5, 1.7 Hz, H2), 1.63 (3H, dd, *J* = 9.5, 1.7 Hz, H2). **<sup>13</sup>C NMR** (101 MHz, CDCl<sub>3</sub>) δ 146.0, 129.4, 112.8, 77.5, 64.9, 51.0, 43.0, 38.2, 32.1, 28.3, 13.3. **m.p.** = 193 – 194 °C. **[α]<sub>D</sub>** = -23.57 ° (*c* = 1.04 g/100 cm<sup>3</sup>, CHCl<sub>3</sub>). **IR** (film)  $\nu_{\text{max}}$ /cm<sup>-1</sup> 3160 (broad), 2961, 2922, 2904, 2870, 1464, 1402, 1347, 1242, 1196, 1036, 998, 774, 709. **HRMS** (ESI) [M+H]<sup>+</sup> calc. 285.0598 for [C<sub>12</sub>H<sub>18</sub><sup>79</sup>BrN<sub>2</sub>O]<sup>+</sup>; found 285.0602, calc. 287.0577 for [C<sub>12</sub>H<sub>18</sub><sup>81</sup>BrN<sub>2</sub>O]<sup>+</sup>; found 287.0583. *ee* = 98% as determined by SFC (chiralpak IC column, sCO<sub>2</sub>:MeOH, 99:1 for 0 – 1 min, gradient to 60:40 for 1 – 5 min, 3.00 mL/min, T = 35 °C); **R<sub>T</sub>** = 3.58 min [(*R*)-minor], **R<sub>T</sub>** = 3.67 min [(*S*)-major].

**(R)-2-(bicyclo[1.1.1]pentan-1-yl)-1-(4-bromo-1,2-dimethyl-1H-imidazol-5-yl)ethan-1-ol**  
[(R)-11]

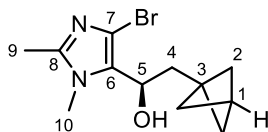

(R)-11

To a vial containing **24** (0.140 g, 0.494 mmol) in dry *i*-PrOH (3 mL) was added RuCl<sub>2</sub>[(S)-DM-BINAP][(S)-DAIPEN] (0.0302 g, 0.0247 mmol) followed by potassium *tert*-butoxide (0.055 g, 0.494 mmol). A few drops of triisopropyl borate were added and the vial was placed in a Parr hydrogenator. The hydrogenator was flushed with H<sub>2</sub> (3 x 20 bar) and the reaction mixture was stirred under H<sub>2</sub> (20 bar) at rt for 72 h. Water (5 mL) was added and the product was extracted into dichloromethane (3 x 5 mL). The combined organic layers were dried over Na<sub>2</sub>SO<sub>4</sub>, filtered and concentrated *in vacuo*. Purification by column chromatography (100% EtOAc) afforded the desired product as a white solid (0.069 g, 49%). The product was recrystallized from CHCl<sub>3</sub> by vapour diffusion of pentane to afford crystals with 99% *ee* (0.048 g, 34%). Crystals suitable for X-ray diffraction were grown from CHCl<sub>3</sub> by slow vapour diffusion of pentane.

**R<sub>f</sub>** = 0.27 (100% EtOAc) [PMA] **<sup>1</sup>H NMR** (500 MHz, CDCl<sub>3</sub>) δ 4.86 (1H, td, *J* = 7.5, 2.9 Hz, H5), 3.62 (3H, s, H10), 2.48 (1H, d, *J* = 2.9 Hz, -OH), 2.43 (1H, s, H1), 2.31 (3H, s, H9), 2.10 (1H, dd, *J* = 14.3, 7.5 Hz, H4), 1.96 (1H, dd, *J* = 14.3, 7.5 Hz, H4), 1.69 (3H, dd, *J* = 9.5, 1.7 Hz, H2), 1.62 (3H, dd, *J* = 9.5, 1.7 Hz, H2). **<sup>13</sup>C NMR** (126 MHz, CDCl<sub>3</sub>) δ 146.0, 129.3, 112.9, 64.9, 51.0, 42.9, 38.2, 32.0, 28.3, 13.3. **m.p.** = 193 – 194 °C. **[α]<sub>D</sub>** = +18.65 ° (c = 0.98 g/100 cm<sup>3</sup>, CHCl<sub>3</sub>). **IR** (film) ν<sub>max</sub>/cm<sup>-1</sup> 3160 (broad), 2961, 2922, 2904, 2869, 1464, 1402, 1347, 1242, 1196, 1036, 998, 774, 709. *ee* = 99% as determined by SFC (chiralpak IC column, sCO<sub>2</sub>:MeOH, 99:1 for 0 – 1 min, gradient to 60:40 for 1 – 5 min, 3.00 mL/min, T = 35 °C); **R<sub>T</sub>** = 3.57 min [(R)-major], **R<sub>T</sub>** = 3.67 min [(S)-minor].

**methyl 4-((4*S*,5*R*)-5-((*E*)-2-(5-((*S*)-2-(bicyclo[1.1.1]pentan-1-yl)-1-hydroxyethyl)-1,2-dimethyl-1*H*-imidazol-4-yl)vinyl)-2,2-dimethyl-1,3-dioxolan-4-yl)butanoate [8a]**

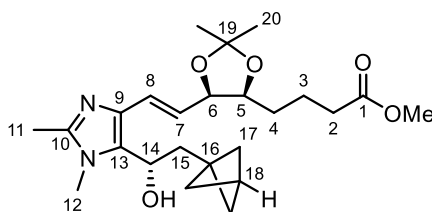

**8a**

To a Schlenk tube under N<sub>2</sub> was added (*S*)-**11** (0.029 g, 0.102 mmol), **10** (0.040 g, 0.112 mmol) and PdCl<sub>2</sub>(dppf)•CH<sub>2</sub>Cl<sub>2</sub> (0.0042 g, 0.0051 mmol) in toluene (1 mL). K<sub>2</sub>CO<sub>3</sub> (2.0 M in H<sub>2</sub>O, 0.15 mL, 0.31 mmol) was added and the resulting mixture was refluxed at 110 °C in an oil bath for 18 h. The mixture was then diluted with dichloromethane (10 mL) and washed with H<sub>2</sub>O (2 x 10 mL) followed by brine (10 mL). The organic layer was dried over MgSO<sub>4</sub>, filtered and concentrated *in vacuo*. Purification by column chromatography (SiO<sub>2</sub>, CH<sub>2</sub>Cl<sub>2</sub>/MeOH, 19:1) afforded the desired compound as a pale orange oil (0.032 g, 73%).

**R<sub>f</sub>** = 0.41 (CH<sub>2</sub>Cl<sub>2</sub>/MeOH, 19:1) [UV/PMA] **<sup>1</sup>H NMR** (400 MHz, CDCl<sub>3</sub>) δ 6.40 (1H, dd, *J* = 15.4, 1.1 Hz, H8), 6.18 (1H, dd, *J* = 15.4, 6.8 Hz, H7), 4.88 (1H, t, *J* = 7.4 Hz, H14), 4.65 (1H, t, *J* = 6.8 Hz, H6), 4.15 (1H, ddd, *J* = 8.9, 6.2, 4.5 Hz, H5), 3.61 (3H, s, -OMe), 3.56 (3H, s, H12), 2.40 (1H, s, H18), 2.35 – 2.27 (2H, m, H2), 2.25 (3H, s, H11), 2.08 (1H, dd, *J* = 14.3, 7.4 Hz, H15), 1.85 (1H, d, *J* = 14.3, 7.4 Hz, H15), 1.81 – 1.73 (1H, m, H3), 1.63 (3H, dd, *J* = 9.6, 1.6 Hz, H17), 1.58 (3H, dd, *J* = 9.5, 1.6 Hz, H17), 1.72 – 1.41 (3H, m, H3, H4), 1.49 (3H, s, H20), 1.37 (3H, s, H20). **<sup>13</sup>C NMR** (101 MHz, CDCl<sub>3</sub>) δ 174.1, 146.3, 133.8, 130.3, 123.0, 122.7, 108.2, 79.5, 78.5, 63.9, 51.6, 50.9, 43.1, 38.4, 34.0, 31.8, 30.2, 28.4, 28.4, 25.9, 22.0, 13.2. **[α]<sub>D</sub>** = -2.24 ° (c = 1.03 g/100 cm<sup>3</sup>, CHCl<sub>3</sub>). **IR** (film) ν<sub>max</sub>/cm<sup>-1</sup> 3170 (broad), 2958, 2907, 2867, 1736, 1436, 1406, 1370, 1244, 1215, 1198, 1026, 972. **HRMS** (ESI) M<sup>+</sup> calc. 432.2619 for [C<sub>24</sub>H<sub>36</sub>N<sub>2</sub>O<sub>5</sub>]<sup>+</sup>; found 432.2619.



**methyl 4-((4*S*,5*R*)-5-((*E*)-2-(5-((*R*)-2-(bicyclo[1.1.1]pentan-1-yl)-1-hydroxyethyl)-1,2-dimethyl-1*H*-imidazol-4-yl)vinyl)-2,2-dimethyl-1,3-dioxolan-4-yl)butanoate [8b]**

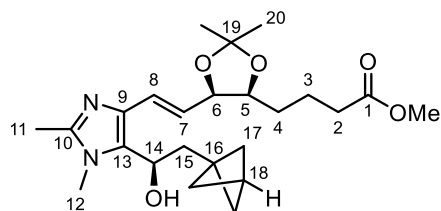

**8b**

To a Schlenk tube under N<sub>2</sub> was added (*R*)-**11** (0.030 g, 0.105 mmol), **10** (0.041 g, 0.116 mmol) and PdCl<sub>2</sub>(dppf)•CH<sub>2</sub>Cl<sub>2</sub> (0.0043 g, 0.0053 mmol) in toluene (1 mL). K<sub>2</sub>CO<sub>3</sub> (2.0 M in H<sub>2</sub>O, 0.16 mL, 0.32 mmol) was added and the resulting mixture was refluxed at 110 °C in an oil bath for 18 h. The mixture was then diluted with dichloromethane (10 mL) and washed with H<sub>2</sub>O (2 x 10 mL) followed by brine (10 mL). The organic layer was dried over MgSO<sub>4</sub>, filtered and concentrated *in vacuo*. Purification by column chromatography (SiO<sub>2</sub>, CH<sub>2</sub>Cl<sub>2</sub>/MeOH, 19:1) afforded the desired compound as a pale orange oil (0.030 g, 66%).

**R<sub>f</sub>** = 0.38 (CH<sub>2</sub>Cl<sub>2</sub>/MeOH, 19:1) [UV/PMA] **<sup>1</sup>H NMR** (400 MHz, CDCl<sub>3</sub>) δ 6.35 (1H, dd, *J* = 15.4, 0.8 Hz, H8), 6.14 (1H, dd, *J* = 15.4, 8.3 Hz, H7), 4.86 (1H, t, *J* = 7.5 Hz, H14), 4.59 (1H, dd, *J* = 8.3, 6.1 Hz, H6), 4.13 (1H, ddd, *J* = 8.8, 6.1, 4.3 Hz, H5), 3.61 (3H, s, -OMe), 3.54 (3H, s, H12), 2.37 (1H, s, H18), 2.34 – 2.24 (2H, m, H2), 2.19 (3H, s, H11), 2.07 (1H, dd, *J* = 14.4, 7.5 Hz, H15), 1.85 (1H, dd, *J* = 14.4, 7.5 Hz, H15), 1.81 – 1.72 (1H, m, H3), 1.59 (3H, dd, *J* = 9.6, 1.6 Hz, H17), 1.54 (3H, dd, *J* = 9.6, 1.6 Hz, H17), 1.70 – 1.39 (3H, m, H3, H4), 1.49 (3H, s, H20), 1.37 (3H, s, H20). **<sup>13</sup>C NMR** (101 MHz, CDCl<sub>3</sub>) δ 174.0, 146.1, 133.6, 130.7, 124.2, 122.3, 108.2, 80.4, 78.5, 63.4, 51.6, 50.9, 43.1, 38.3, 33.9, 31.8, 30.1, 28.5, 28.3, 25.9, 21.9, 13.0. **[α]<sub>D</sub>** = +13.15° (c = 1.07 g/100 cm<sup>3</sup>, CHCl<sub>3</sub>). **IR** (film) ν<sub>max</sub>/cm<sup>-1</sup> 3165 (broad), 2959, 2907, 2867, 1737, 1436, 1406, 1378, 1369, 1320, 1215, 1198, 1165, 1028, 972, 879. **HRMS** (ESI) [M+H]<sup>+</sup> calc. 433.2697 for [C<sub>24</sub>H<sub>37</sub>N<sub>2</sub>O<sub>5</sub>]<sup>+</sup>; found 433.2708.

**methyl (5*S*,6*R*,*E*)-8-(5-((*S*)-2-(bicyclo[1.1.1]pentan-1-yl)-1-hydroxyethyl)-1,2-dimethyl-1*H*-imidazol-4-yl)-5,6-dihydroxyoct-7-enoate [6a]**

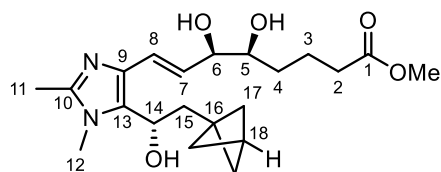

**6a**

To a vial containing **8a** (0.031 g, 0.072 mmol) in MeOH (1 mL) was added ZrCl<sub>4</sub> (0.0084 g, 0.036 mmol). The resulting mixture was stirred at rt for 7 h. The solution was then concentrated *in vacuo* at room temperature. Purification by column chromatography (SiO<sub>2</sub>, CH<sub>2</sub>Cl<sub>2</sub>/MeOH, 9:1) afforded the desired compound as a pale yellow oil (0.020 g, 71%).

**R<sub>f</sub>** = 0.19 (CH<sub>2</sub>Cl<sub>2</sub>/MeOH, 9:1) [UV/PMA] **<sup>1</sup>H NMR** (500 MHz, CDCl<sub>3</sub>) δ 6.44 (1H, dd, *J* = 15.7, 1.3 Hz, H8), 6.24 (1H, dd, *J* = 15.7, 6.5 Hz, H7), 4.87 (1H, t, *J* = 7.5 Hz, H14), 4.13 (1H, dd, *J* = 6.5, 2.9 Hz, H6), 3.65 – 3.60 (1H, m, H5), 3.63 (3H, s, -OMe), 3.57 (3H, s, H12), 2.38 (1H, s, H18), 2.29 (3H, s, H11), 2.32 – 2.26 (2H, m, H2), 2.07 (1H, dd, *J* = 14.3, 7.5 Hz, H15), 1.88 (1H, dd, *J* = 14.3, 7.5 Hz, H15), 1.85 – 1.75 (1H, m, H3), 1.70 – 1.57 (1H, m, H3), 1.60 (3H, dd, *J* = 9.6, 1.7 Hz, H17), 1.57 – 1.49 (1H, m, H4), 1.55 (3H, dd, *J* = 9.5, 1.7 Hz, H17), 1.48 – 1.37 (1H, m, H4). **<sup>13</sup>C NMR** (126 MHz, CDCl<sub>3</sub>) δ 174.5, 146.0, 133.4, 130.3, 126.8, 121.9, 75.8, 74.3, 63.6, 51.7, 50.9, 43.1, 38.4, 34.0, 31.8, 31.7, 28.4, 21.5, 12.9. **[α]<sub>D</sub>** = -12.10 ° (*c* = 0.95 g/100 cm<sup>3</sup>, CHCl<sub>3</sub>). **IR** (film) *v*<sub>max</sub>/cm<sup>-1</sup> 3354 (broad), 2959, 2907, 2868, 1735, 1436, 1407, 1198, 1078, 1035, 1005, 972, 754. **HRMS** (ESI) [M+H]<sup>+</sup> calc. 393.2384 for [C<sub>21</sub>H<sub>33</sub>N<sub>2</sub>O<sub>5</sub>]<sup>+</sup>; found 393.2386.

**methyl (5*S*,6*R*,*E*)-8-(5-((*R*)-2-(bicyclo[1.1.1]pentan-1-yl)-1-hydroxyethyl)-1,2-dimethyl-1*H*-imidazol-4-yl)-5,6-dihydroxyoct-7-enoate [6*b*]**

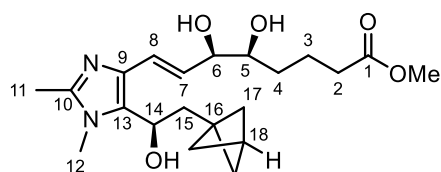

**6*b***

To a vial containing **8b** (0.030 g, 0.069 mmol) in MeOH (1 mL) was added ZrCl<sub>4</sub> (0.0081 g, 0.035 mmol). The resulting mixture was stirred at rt for 7 h. The solution was then concentrated *in vacuo* at room temperature. Purification by column chromatography (SiO<sub>2</sub>, CH<sub>2</sub>Cl<sub>2</sub>/MeOH, 9:1) afforded the desired compound as a pale yellow oil (0.022 g, 77%).

**R<sub>f</sub>** = 0.22 (CH<sub>2</sub>Cl<sub>2</sub>/MeOH, 9:1) [UV/PMA] **<sup>1</sup>H NMR** (500 MHz, CDCl<sub>3</sub>) δ 6.43 (1H, d, *J* = 15.7 Hz, H8), 6.28 (1H, dd, *J* = 15.6, 6.6 Hz, H7), 4.87 (1H, t, *J* = 7.6 Hz, H14), 4.09 (1H, dd, *J* = 6.8, 3.7 Hz, H6), 3.68 – 3.64 (1H, m, H5), 3.63 (3H, s, -OMe), 3.59 (3H, s, H12), 2.37 (1H, s, H18), 2.30 (3H, s, H11), 2.32 – 2.26 (2H, m, H2), 2.07 (1H, dd, *J* = 14.3, 7.6 Hz, H15), 1.90 (1H, dd, *J* = 14.3, 7.6 Hz, H15), 1.86 – 1.75 (1H, m, H3), 1.69 – 1.53 (1H, m, H3), 1.58 (3H, dd, *J* = 9.6, 1.7 Hz, H17), 1.52 (3H, dd, *J* = 9.6, 1.7 Hz, H17), 1.55 – 1.37 (2H, m, H4). **<sup>13</sup>C NMR** (126 MHz, CDCl<sub>3</sub>) δ 174.4, 146.2, 133.6, 130.2, 126.4, 122.2, 76.0, 74.4, 63.4, 51.7, 50.9, 43.0, 38.3, 34.0, 32.0, 31.9, 28.4, 21.5, 12.9. [**α**]<sub>D</sub> = +5.71 ° (c = 1.05 g/100 cm<sup>3</sup>, CHCl<sub>3</sub>). **IR** (film) ν<sub>max</sub>/cm<sup>-1</sup> 3372 (broad), 2960, 2907, 2868, 1736, 1522, 1436, 1407, 1198, 1078, 1033, 1005, 972. **HRMS** (ESI) [M+H]<sup>+</sup> calc. 393.2384 for [C<sub>21</sub>H<sub>33</sub>N<sub>2</sub>O<sub>5</sub>]<sup>+</sup>; found 393.2387.

### 3. SFC Chromatograms

#### 3.1 Compounds 19a and 19b

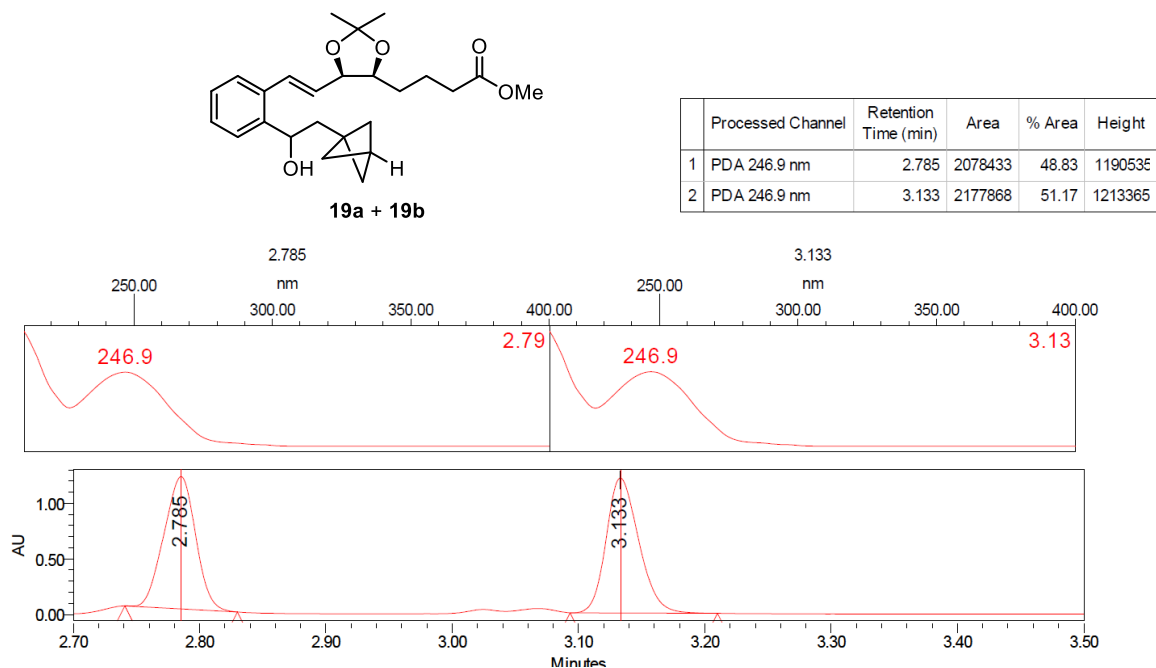

**Figure S1.** SFC (chiralpak ID column, sCO<sub>2</sub>:0.2% NH<sub>4</sub>OH in MeOH, 99:1 for 0 – 1 min, gradient to 40:60 for 1 – 5 min, 3.00 mL/min, T = 35 °C); R<sub>T</sub> = 2.79 min [(*S*)-epimer], R<sub>T</sub> = 3.13 min [(*R*)-epimer].

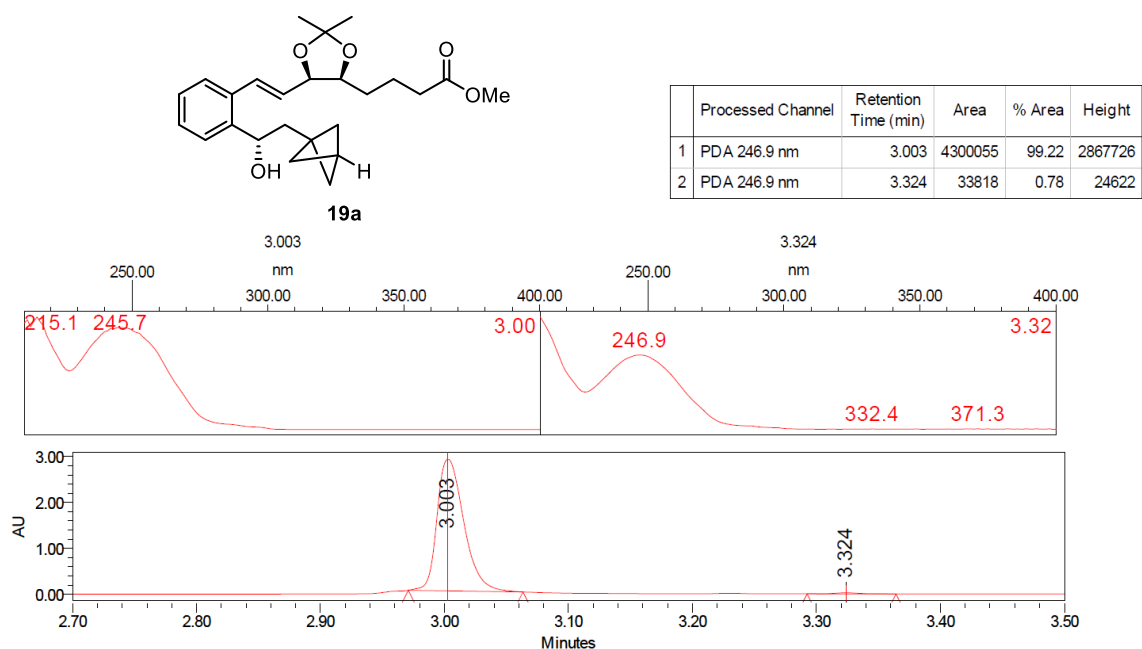

**Figure S2.** *dr* = 99:1 as determined by SFC (chiralpak ID column, sCO<sub>2</sub>:0.2% NH<sub>4</sub>OH in MeOH, 99:1 for 0 – 1 min, gradient to 40:60 for 1 – 5 min, 3.00 mL/min, T = 35 °C); R<sub>T</sub> = 3.00 min [(*S*)-major], R<sub>T</sub> = 3.32 min [(*R*)-minor].

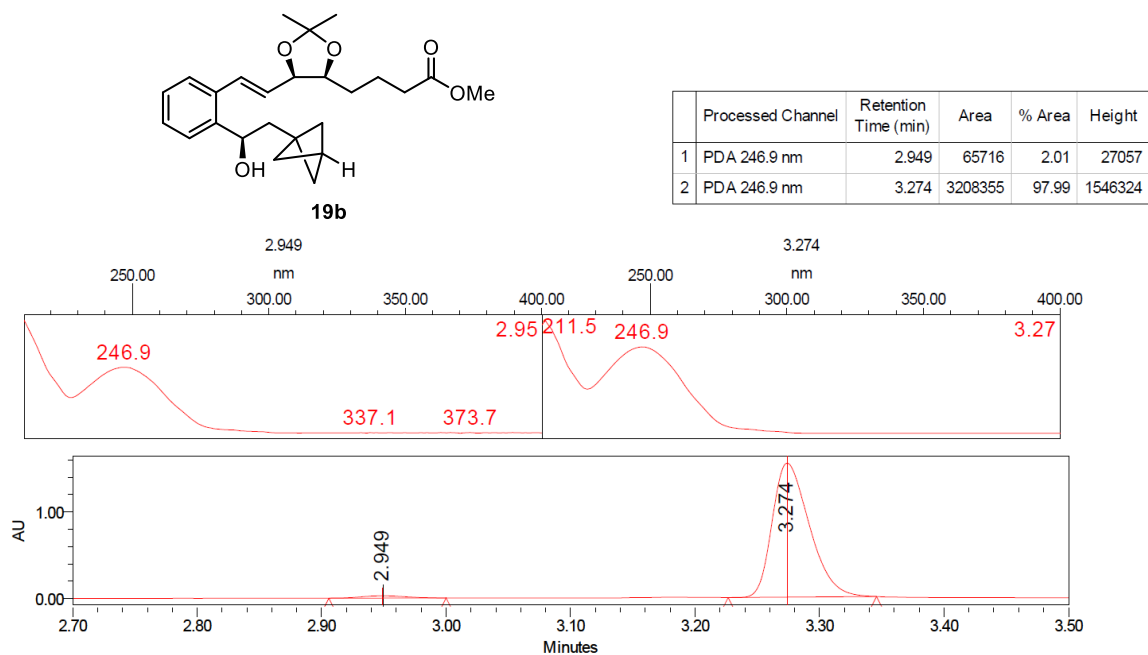

**Figure S3.**  $dr = 49:1$  as determined by SFC (chiralpak ID column,  $s\text{CO}_2:0.2\% \text{NH}_4\text{OH}$  in MeOH, 99:1 for 0 – 1 min, gradient to 40:60 for 1 – 5 min, 3.00 mL/min,  $T = 35^\circ\text{C}$ );  $R_T = 2.95$  min [(*S*)-minor],  $R_T = 3.27$  min [(*R*)-major].

### 3.2 Compounds *rac*-11, (*S*)-11 and (*R*)-11

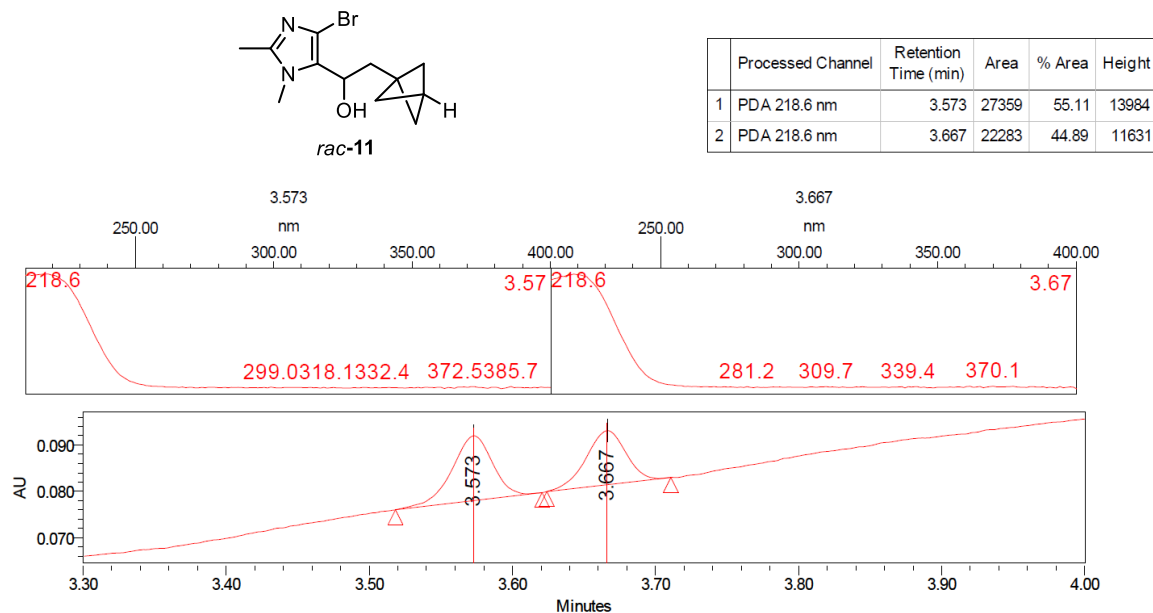

**Figure S4.** SFC (chiralpak IC column,  $s\text{CO}_2:\text{MeOH}$ , 99:1 for 0 – 1 min, gradient to 60:40 for 1 – 5 min, 3.00 mL/min,  $T = 35^\circ\text{C}$ );  $R_T = 3.58$  min [(*R*)-enantiomer],  $R_T = 3.67$  min [(*S*)-enantiomer].

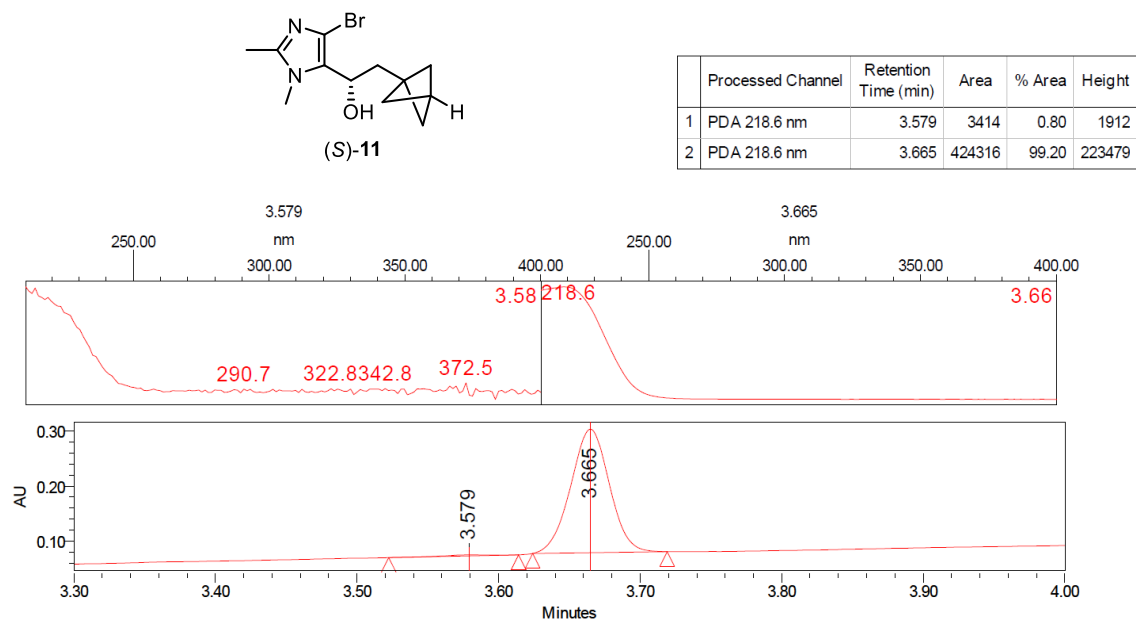

**Figure S5.**  $ee = 98\%$  as determined by SFC (chiralpak IC column,  $s\text{CO}_2:\text{MeOH}$ , 99:1 for 0 – 1 min, gradient to 60:40 for 1 – 5 min, 3.00 mL/min,  $T = 35\text{ }^\circ\text{C}$ );  $R_T = 3.58$  min [(*R*)-minor],  $R_T = 3.67$  min [(*S*)-major].

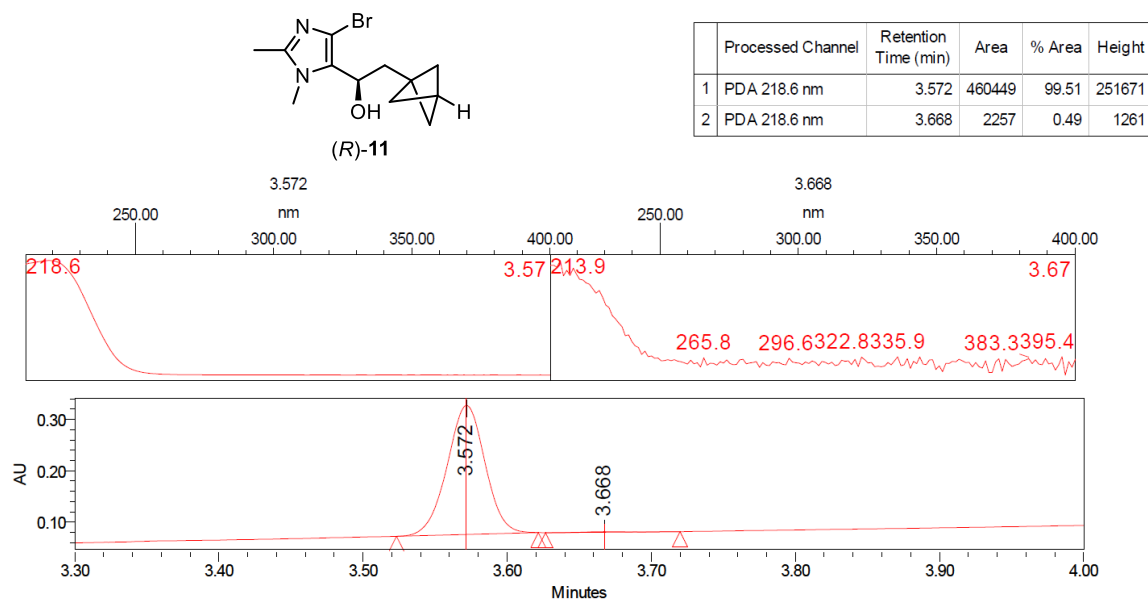

**Figure S6.**  $ee = 99\%$  as determined by SFC (chiralpak IC column,  $s\text{CO}_2:\text{MeOH}$ , 99:1 for 0 – 1 min, gradient to 60:40 for 1 – 5 min, 3.00 mL/min,  $T = 35\text{ }^\circ\text{C}$ );  $R_T = 3.57$  min [(*R*)-major],  $R_T = 3.67$  min [(*S*)-minor].

## 4. X-ray Crystallographic Data for Compounds (*S*)-11 and (*R*)-11

### 4.1 (*S*)-11

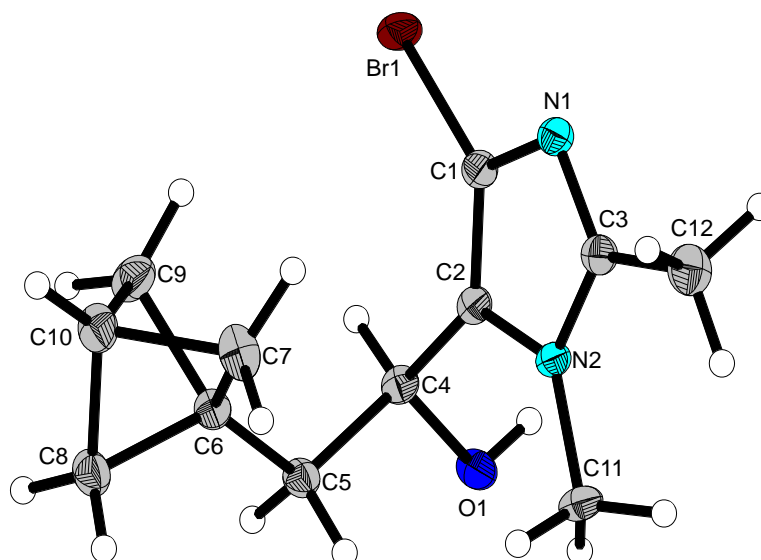

(*S*)-11, molecule; thermal ellipsoids are drawn on the 50% level.

**Table S1.** Crystal data and structure refinement for (*S*)-11.

|                                 |                                                     |          |
|---------------------------------|-----------------------------------------------------|----------|
| Identification code             | gui198                                              |          |
| Empirical formula               | C <sub>12</sub> H <sub>17</sub> N <sub>2</sub> O Br |          |
| Formula weight                  | 285.18                                              |          |
| Temperature                     | 100(2) K                                            |          |
| Wavelength                      | 1.54184 Å                                           |          |
| Crystal system                  | Orthorhombic                                        |          |
| Space group                     | P2 <sub>1</sub> 2 <sub>1</sub> 2 <sub>1</sub> (#19) |          |
| Unit cell dimensions            | a = 8.79582(8) Å                                    | α = 90°. |
|                                 | b = 9.8976(1) Å                                     | β = 90°. |
|                                 | c = 14.1690(2) Å                                    | γ = 90°. |
| Volume                          | 1233.52(2) Å <sup>3</sup>                           |          |
| Z                               | 4                                                   |          |
| Density (calculated)            | 1.536 Mg/m <sup>3</sup>                             |          |
| Absorption coefficient          | 4.391 mm <sup>-1</sup>                              |          |
| F(000)                          | 584                                                 |          |
| Crystal size                    | 0.190 x 0.120 x 0.110 mm <sup>3</sup>               |          |
| Theta range for data collection | 5.452 to 76.770°.                                   |          |

|                                    |                                                              |
|------------------------------------|--------------------------------------------------------------|
| Index ranges                       | $-11 \leq h \leq 11, -12 \leq k \leq 12, -17 \leq l \leq 15$ |
| Reflections collected              | 12794                                                        |
| Independent reflections            | 2578 [R(int) = 0.0209]                                       |
| Completeness to theta =<br>67.684° | 100.0 %                                                      |
| Absorption correction              | Semi-empirical from equivalents                              |
| Max. and min. transmission         | 1.00000 and 0.80002                                          |
| Refinement method                  | Full-matrix least-squares on F <sup>2</sup>                  |
| Data / restraints / parameters     | 2578 / 0 / 148                                               |
| Goodness-of-fit on F <sup>2</sup>  | 1.058                                                        |
| Final R indices [I > 2σ(I)]        | R1 = 0.0161, wR2 = 0.0408                                    |
| R indices (all data)               | R1 = 0.0165, wR2 = 0.0412                                    |
| Absolute structure parameter       | -0.031(6)                                                    |
| Extinction coefficient             | n/a                                                          |
| Largest diff. peak and hole        | 0.190 and -0.364 e.Å <sup>-3</sup>                           |



**Table S2.** Atomic coordinates ( $\times 10^4$ ) and equivalent isotropic displacement parameters ( $\text{\AA}^2 \times 10^3$ )

for (S)-**11**. U(eq) is defined as one third of the trace of the orthogonalized  $U^{ij}$  tensor.

| Atom  | x        | y       | z       | U(eq) |
|-------|----------|---------|---------|-------|
| N(1)  | 7471(2)  | 8426(2) | 5208(1) | 16(1) |
| C(1)  | 7974(2)  | 7196(2) | 4897(1) | 16(1) |
| Br(1) | 7858(1)  | 6770(1) | 3607(1) | 23(1) |
| C(2)  | 8546(2)  | 6412(2) | 5600(1) | 14(1) |
| C(4)  | 9145(2)  | 4996(2) | 5583(1) | 15(1) |
| O(1)  | 10658(2) | 4895(2) | 5944(1) | 19(1) |
| C(5)  | 8187(2)  | 3982(2) | 6140(2) | 16(1) |
| C(6)  | 6525(2)  | 3956(2) | 5887(2) | 16(1) |
| C(7)  | 5286(2)  | 5041(2) | 6089(2) | 23(1) |
| C(8)  | 5348(2)  | 2883(2) | 6220(2) | 22(1) |
| C(9)  | 5802(3)  | 3808(3) | 4887(2) | 23(1) |
| C(10) | 4442(2)  | 3868(2) | 5587(2) | 22(1) |
| N(2)  | 8395(2)  | 7223(2) | 6398(1) | 14(1) |
| C(11) | 8835(2)  | 6858(2) | 7362(1) | 21(1) |
| C(3)  | 7757(2)  | 8411(2) | 6126(1) | 16(1) |
| C(12) | 7434(3)  | 9567(2) | 6771(2) | 24(1) |

**Table S3.** Bond lengths [Å] and angles [°] for (S)-11.

|              |            |
|--------------|------------|
| N(1)–C(3)    | 1.326(2)   |
| N(1)–C(1)    | 1.368(3)   |
| C(1)–C(2)    | 1.359(3)   |
| C(1)–Br(1)   | 1.8780(19) |
| C(2)–N(2)    | 1.394(3)   |
| C(2)–C(4)    | 1.497(3)   |
| C(4)–O(1)    | 1.430(2)   |
| C(4)–C(5)    | 1.530(3)   |
| C(4)–H(4)    | 1.0000     |
| O(1)–H(1O1)  | 0.8400     |
| C(5)–C(6)    | 1.505(3)   |
| C(5)–H(5A)   | 0.9900     |
| C(5)–H(5B)   | 0.9900     |
| C(6)–C(8)    | 1.556(3)   |
| C(6)–C(7)    | 1.557(3)   |
| C(6)–C(9)    | 1.560(3)   |
| C(7)–C(10)   | 1.551(3)   |
| C(7)–H(7A)   | 0.9900     |
| C(7)–H(7B)   | 0.9900     |
| C(8)–C(10)   | 1.546(3)   |
| C(8)–H(8A)   | 0.9900     |
| C(8)–H(8B)   | 0.9900     |
| C(9)–C(10)   | 1.555(3)   |
| C(9)–H(9A)   | 0.9900     |
| C(9)–H(9B)   | 0.9900     |
| C(10)–H(10)  | 1.0000     |
| N(2)–C(3)    | 1.359(3)   |
| N(2)–C(11)   | 1.465(2)   |
| C(11)–H(11A) | 0.9800     |
| C(11)–H(11B) | 0.9800     |
| C(11)–H(11C) | 0.9800     |
| C(3)–C(12)   | 1.491(3)   |
| C(12)–H(12A) | 0.9800     |
| C(12)–H(12B) | 0.9800     |
| C(12)–H(12C) | 0.9800     |

|                  |            |
|------------------|------------|
|                  |            |
| C(3)–N(1)–C(1)   | 104.17(16) |
| C(2)–C(1)–N(1)   | 113.12(17) |
| C(2)–C(1)–Br(1)  | 127.20(15) |
| N(1)–C(1)–Br(1)  | 119.67(14) |
| C(1)–C(2)–N(2)   | 103.31(17) |
| C(1)–C(2)–C(4)   | 130.78(18) |
| N(2)–C(2)–C(4)   | 125.86(18) |
| O(1)–C(4)–C(2)   | 112.80(17) |
| O(1)–C(4)–C(5)   | 106.37(16) |
| C(2)–C(4)–C(5)   | 114.34(17) |
| O(1)–C(4)–H(4)   | 107.7      |
| C(2)–C(4)–H(4)   | 107.7      |
| C(5)–C(4)–H(4)   | 107.7      |
| C(4)–O(1)–H(1O1) | 109.5      |
| C(6)–C(5)–C(4)   | 115.05(17) |
| C(6)–C(5)–H(5A)  | 108.5      |
| C(4)–C(5)–H(5A)  | 108.5      |
| C(6)–C(5)–H(5B)  | 108.5      |
| C(4)–C(5)–H(5B)  | 108.5      |
| H(5A)–C(5)–H(5B) | 107.5      |
| C(5)–C(6)–C(8)   | 125.83(18) |
| C(5)–C(6)–C(7)   | 128.67(19) |
| C(8)–C(6)–C(7)   | 87.12(16)  |
| C(5)–C(6)–C(9)   | 127.83(18) |
| C(8)–C(6)–C(9)   | 86.54(16)  |
| C(7)–C(6)–C(9)   | 86.91(17)  |
| C(10)–C(7)–C(6)  | 74.60(15)  |
| C(10)–C(7)–H(7A) | 116.0      |
| C(6)–C(7)–H(7A)  | 116.0      |
| C(10)–C(7)–H(7B) | 116.0      |
| C(6)–C(7)–H(7B)  | 116.0      |
| H(7A)–C(7)–H(7B) | 113.0      |
| C(10)–C(8)–C(6)  | 74.76(15)  |
| C(10)–C(8)–H(8A) | 116.0      |
| C(6)–C(8)–H(8A)  | 116.0      |
| C(10)–C(8)–H(8B) | 116.0      |

|                     |            |
|---------------------|------------|
| C(6)–C(8)–H(8B)     | 116.0      |
| H(8A)–C(8)–H(8B)    | 113.0      |
| C(10)–C(9)–C(6)     | 74.38(15)  |
| C(10)–C(9)–H(9A)    | 116.1      |
| C(6)–C(9)–H(9A)     | 116.1      |
| C(10)–C(9)–H(9B)    | 116.1      |
| C(6)–C(9)–H(9B)     | 116.1      |
| H(9A)–C(9)–H(9B)    | 113.1      |
| C(8)–C(10)–C(7)     | 87.68(16)  |
| C(8)–C(10)–C(9)     | 87.07(17)  |
| C(7)–C(10)–C(9)     | 87.29(16)  |
| C(8)–C(10)–H(10)    | 127.1      |
| C(7)–C(10)–H(10)    | 127.1      |
| C(9)–C(10)–H(10)    | 127.1      |
| C(3)–N(2)–C(2)      | 107.93(17) |
| C(3)–N(2)–C(11)     | 125.91(17) |
| C(2)–N(2)–C(11)     | 126.15(17) |
| N(2)–C(11)–H(11A)   | 109.5      |
| N(2)–C(11)–H(11B)   | 109.5      |
| H(11A)–C(11)–H(11B) | 109.5      |
| N(2)–C(11)–H(11C)   | 109.5      |
| H(11A)–C(11)–H(11C) | 109.5      |
| H(11B)–C(11)–H(11C) | 109.5      |
| N(1)–C(3)–N(2)      | 111.47(17) |
| N(1)–C(3)–C(12)     | 123.84(19) |
| N(2)–C(3)–C(12)     | 124.68(18) |
| C(3)–C(12)–H(12A)   | 109.5      |
| C(3)–C(12)–H(12B)   | 109.5      |
| H(12A)–C(12)–H(12B) | 109.5      |
| C(3)–C(12)–H(12C)   | 109.5      |
| H(12A)–C(12)–H(12C) | 109.5      |
| H(12B)–C(12)–H(12C) | 109.5      |

---

Symmetry transformations used to generate equivalent atoms:

**Table S4.** Anisotropic displacement parameters ( $\text{\AA}^2 \times 10^3$ ) for (*S*)-**11**. The anisotropic displacement factor exponent takes the form:  $-2 \square^2 [ h^2 a^* 2 U^{11} + \dots + 2 h k a^* b^* U^{12} ]$

---

| Atom | U11 | U22 | U33 | U23 | U13 | U12 |
|------|-----|-----|-----|-----|-----|-----|
|------|-----|-----|-----|-----|-----|-----|

---

|       |       |       |       |       |       |       |
|-------|-------|-------|-------|-------|-------|-------|
| N(1)  | 14(1) | 17(1) | 17(1) | 2(1)  | -1(1) | -1(1) |
| C(1)  | 15(1) | 17(1) | 14(1) | 1(1)  | 1(1)  | -2(1) |
| Br(1) | 33(1) | 23(1) | 12(1) | 1(1)  | -2(1) | 0(1)  |
| C(2)  | 12(1) | 18(1) | 13(1) | 0(1)  | 1(1)  | -1(1) |
| C(4)  | 12(1) | 17(1) | 16(1) | 0(1)  | -1(1) | 2(1)  |
| O(1)  | 12(1) | 21(1) | 24(1) | 7(1)  | -1(1) | 0(1)  |
| C(5)  | 15(1) | 16(1) | 19(1) | 2(1)  | -1(1) | 1(1)  |
| C(6)  | 14(1) | 16(1) | 18(1) | 0(1)  | 0(1)  | 1(1)  |
| C(7)  | 16(1) | 18(1) | 34(1) | -2(1) | 5(1)  | 2(1)  |
| C(8)  | 18(1) | 19(1) | 29(1) | 4(1)  | -2(1) | -3(1) |
| C(9)  | 18(1) | 31(1) | 22(1) | 0(1)  | -4(1) | -2(1) |
| C(10) | 13(1) | 22(1) | 32(1) | 2(1)  | -3(1) | 0(1)  |
| N(2)  | 15(1) | 16(1) | 13(1) | 0(1)  | -1(1) | 0(1)  |
| C(11) | 26(1) | 24(1) | 14(1) | 2(1)  | -5(1) | 1(1)  |
| C(3)  | 14(1) | 17(1) | 17(1) | 1(1)  | 1(1)  | -1(1) |
| C(12) | 29(1) | 19(1) | 24(1) | -4(1) | 1(1)  | 2(1)  |

---

**Table S5.** Hydrogen coordinates ( $\times 10^4$ ) and isotropic displacement parameters ( $\text{\AA}^2 \times 10^3$ ) for (S)-11.

| Atom   | x     | y     | z    | U(eq) |
|--------|-------|-------|------|-------|
| H(4)   | 9165  | 4691  | 4910 | 18    |
| H(10I) | 11238 | 5395  | 5628 | 28    |
| H(5A)  | 8613  | 3067  | 6039 | 20    |
| H(5B)  | 8283  | 4192  | 6820 | 20    |
| H(7A)  | 5025  | 5187  | 6761 | 28    |
| H(7B)  | 5374  | 5894  | 5728 | 28    |
| H(8A)  | 5489  | 1958  | 5968 | 26    |
| H(8B)  | 5091  | 2895  | 6900 | 26    |
| H(9A)  | 5918  | 4593  | 4460 | 28    |
| H(9B)  | 5967  | 2931  | 4566 | 28    |
| H(10)  | 3335  | 3821  | 5428 | 27    |
| H(11A) | 9081  | 7679  | 7718 | 31    |
| H(11B) | 9727  | 6266  | 7343 | 31    |
| H(11C) | 7991  | 6386  | 7671 | 31    |
| H(12A) | 7841  | 10401 | 6497 | 36    |
| H(12B) | 7916  | 9403  | 7384 | 36    |
| H(12C) | 6333  | 9657  | 6856 | 36    |

**Table S6.** Torsion angles [°] for (*S*)-**11**.

|                      |             |
|----------------------|-------------|
| C(3)–N(1)–C(1)–C(2)  | 0.8(2)      |
| C(3)–N(1)–C(1)–Br(1) | –178.12(14) |
| N(1)–C(1)–C(2)–N(2)  | –0.5(2)     |
| Br(1)–C(1)–C(2)–N(2) | 178.32(15)  |
| N(1)–C(1)–C(2)–C(4)  | 176.93(19)  |
| Br(1)–C(1)–C(2)–C(4) | –4.2(3)     |
| C(1)–C(2)–C(4)–O(1)  | 124.4(2)    |
| N(2)–C(2)–C(4)–O(1)  | –58.7(3)    |
| C(1)–C(2)–C(4)–C(5)  | –113.9(2)   |
| N(2)–C(2)–C(4)–C(5)  | 63.0(3)     |
| O(1)–C(4)–C(5)–C(6)  | 178.19(17)  |
| C(2)–C(4)–C(5)–C(6)  | 53.0(2)     |
| C(4)–C(5)–C(6)–C(8)  | 169.68(19)  |
| C(4)–C(5)–C(6)–C(7)  | –70.4(3)    |
| C(4)–C(5)–C(6)–C(9)  | 51.9(3)     |
| C(5)–C(6)–C(7)–C(10) | –178.3(2)   |
| C(8)–C(6)–C(7)–C(10) | –43.00(15)  |
| C(9)–C(6)–C(7)–C(10) | 43.68(15)   |
| C(5)–C(6)–C(8)–C(10) | –179.5(2)   |
| C(7)–C(6)–C(8)–C(10) | 43.14(16)   |
| C(9)–C(6)–C(8)–C(10) | –43.94(15)  |
| C(5)–C(6)–C(9)–C(10) | 177.8(2)    |
| C(8)–C(6)–C(9)–C(10) | 43.71(15)   |
| C(7)–C(6)–C(9)–C(10) | –43.59(15)  |
| C(6)–C(8)–C(10)–C(7) | –43.31(14)  |
| C(6)–C(8)–C(10)–C(9) | 44.09(15)   |
| C(6)–C(7)–C(10)–C(8) | 43.33(15)   |
| C(6)–C(7)–C(10)–C(9) | –43.84(15)  |
| C(6)–C(9)–C(10)–C(8) | –44.04(15)  |
| C(6)–C(9)–C(10)–C(7) | 43.77(15)   |
| C(1)–C(2)–N(2)–C(3)  | 0.0(2)      |
| C(4)–C(2)–N(2)–C(3)  | –177.60(19) |
| C(1)–C(2)–N(2)–C(11) | 179.63(18)  |
| C(4)–C(2)–N(2)–C(11) | 2.0(3)      |
| C(1)–N(1)–C(3)–N(2)  | –0.8(2)     |

|                       |             |
|-----------------------|-------------|
| C(1)–N(1)–C(3)–C(12)  | 178.38(19)  |
| C(2)–N(2)–C(3)–N(1)   | 0.5(2)      |
| C(11)–N(2)–C(3)–N(1)  | –179.11(18) |
| C(2)–N(2)–C(3)–C(12)  | –178.66(19) |
| C(11)–N(2)–C(3)–C(12) | 1.7(3)      |

---

Symmetry transformations used to generate equivalent atoms:

**Table S7.** Hydrogen bonds for (*S*)-**11** [Å and °].

---

| D–H...A                  | d(D–H) | d(H...A) | d(D...A) | <(DHA) |
|--------------------------|--------|----------|----------|--------|
| O(1)–<br>H(1O1)...N(1)#1 | 0.84   | 1.99     | 2.823(2) | 174.9  |

---



---

Symmetry transformations used to generate equivalent atoms:

#1  $x+1/2, -y+3/2, -z+1$



## 4.2 (R)-11

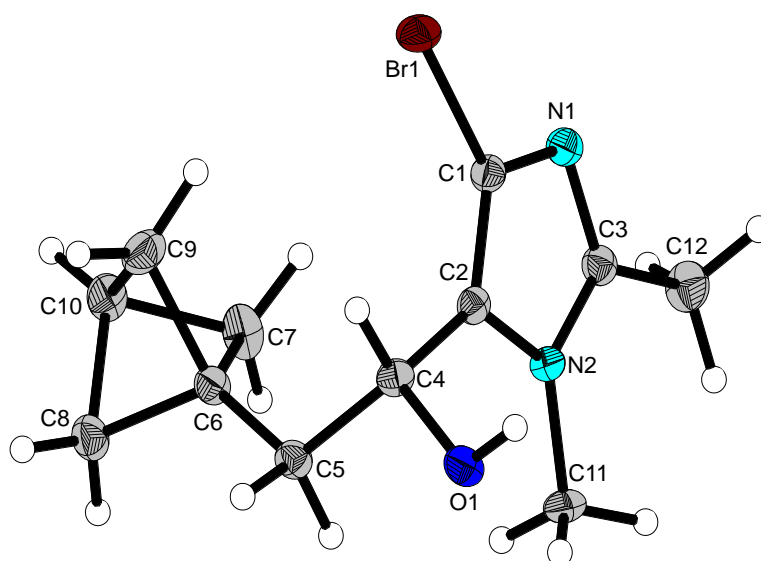

(R)-11, molecule; thermal ellipsoids are drawn on the 50% level.

**Table S8.** Crystal data and structure refinement for (R)-11.

|                                 |                                                     |          |
|---------------------------------|-----------------------------------------------------|----------|
| Identification code             | gui212                                              |          |
| Empirical formula               | C <sub>12</sub> H <sub>17</sub> N <sub>2</sub> O Br |          |
| Formula weight                  | 285.18                                              |          |
| Temperature                     | 100(2) K                                            |          |
| Wavelength                      | 1.54184 Å                                           |          |
| Crystal system                  | Orthorhombic                                        |          |
| Space group                     | P2 <sub>1</sub> 2 <sub>1</sub> 2 <sub>1</sub> (#19) |          |
| Unit cell dimensions            | a = 8.7951(2) Å                                     | ∠ = 90°. |
|                                 | b = 9.8962(1) Å                                     | ∠ = 90°. |
|                                 | c = 14.1699(2) Å                                    | ∠ = 90°. |
| Volume                          | 1233.32(4) Å <sup>3</sup>                           |          |
| Z                               | 4                                                   |          |
| Density (calculated)            | 1.536 Mg/m <sup>3</sup>                             |          |
| Absorption coefficient          | 4.391 mm <sup>-1</sup>                              |          |
| F(000)                          | 584                                                 |          |
| Crystal size                    | 0.170 x 0.120 x 0.080 mm <sup>3</sup>               |          |
| Theta range for data collection | 5.452 to 76.801°.                                   |          |
| Index ranges                    | -10 ≤ h ≤ 11, -12 ≤ k ≤ 12, -12 ≤ l ≤ 17            |          |
| Reflections collected           | 12884                                               |          |
| Independent reflections         | 2572 [R(int) = 0.0216]                              |          |

|                                    |                                             |
|------------------------------------|---------------------------------------------|
| Completeness to theta =<br>67.684° | 100.0 %                                     |
| Absorption correction              | Gaussian                                    |
| Max. and min. transmission         | 0.956 and 0.579                             |
| Refinement method                  | Full-matrix least-squares on F <sup>2</sup> |
| Data / restraints / parameters     | 2572 / 0 / 152                              |
| Goodness-of-fit on F <sup>2</sup>  | 1.042                                       |
| Final R indices [I>2sigma(I)]      | R1 = 0.0156, wR2 = 0.0402                   |
| R indices (all data)               | R1 = 0.0159, wR2 = 0.0404                   |
| Absolute structure parameter       | -0.029(6)                                   |
| Extinction coefficient             | 0.0035(2)                                   |
| Largest diff. peak and hole        | 0.202 and -0.239 e.Å <sup>-3</sup>          |

**Table S9.** Atomic coordinates ( $\times 10^4$ ) and equivalent isotropic displacement parameters ( $\text{\AA}^2 \times 10^3$ ) for (*R*)-**11**.  $U(\text{eq})$  is defined as one third of the trace of the orthogonalized  $U^{ij}$  tensor.

| Atom  | x       | y       | z       | $U(\text{eq})$ |
|-------|---------|---------|---------|----------------|
| N(1)  | 2529(2) | 1575(2) | 4792(1) | 17(1)          |
| C(1)  | 2025(2) | 2803(2) | 5102(1) | 16(1)          |
| Br(1) | 2142(1) | 3229(1) | 6392(1) | 23(1)          |
| C(2)  | 1453(2) | 3587(2) | 4400(1) | 14(1)          |
| C(4)  | 856(2)  | 5006(2) | 4416(1) | 16(1)          |
| O(1)  | -657(2) | 5106(2) | 4055(1) | 20(1)          |
| C(5)  | 1813(2) | 6018(2) | 3862(1) | 17(1)          |
| C(6)  | 3475(2) | 6043(2) | 4115(1) | 16(1)          |
| C(7)  | 4713(2) | 4959(2) | 3912(2) | 24(1)          |
| C(8)  | 4652(2) | 7118(2) | 3781(2) | 22(1)          |
| C(9)  | 4199(3) | 6192(3) | 5115(2) | 24(1)          |
| C(10) | 5555(2) | 6130(2) | 4412(2) | 23(1)          |
| N(2)  | 1604(2) | 2776(2) | 3602(1) | 15(1)          |
| C(11) | 1162(3) | 3142(2) | 2638(1) | 21(1)          |
| C(3)  | 2244(2) | 1589(2) | 3873(1) | 17(1)          |
| C(12) | 2562(3) | 431(2)  | 3229(2) | 25(1)          |

**Table S10.** Bond lengths [Å] and angles [°] for (*R*)-**11**.

|              |            |
|--------------|------------|
| N(1)–C(3)    | 1.326(2)   |
| N(1)–C(1)    | 1.366(2)   |
| C(1)–C(2)    | 1.359(3)   |
| C(1)–Br(1)   | 1.8790(18) |
| C(2)–N(2)    | 1.393(2)   |
| C(2)–C(4)    | 1.498(3)   |
| C(4)–O(1)    | 1.429(2)   |
| C(4)–C(5)    | 1.526(3)   |
| C(4)–H(4)    | 1.0000     |
| O(1)–H(1O1)  | 0.78(4)    |
| C(5)–C(6)    | 1.505(3)   |
| C(5)–H(5A)   | 0.9900     |
| C(5)–H(5B)   | 0.9900     |
| C(6)–C(7)    | 1.555(3)   |
| C(6)–C(8)    | 1.559(3)   |
| C(6)–C(9)    | 1.561(3)   |
| C(7)–C(10)   | 1.547(3)   |
| C(7)–H(7A)   | 0.9900     |
| C(7)–H(7B)   | 0.9900     |
| C(8)–C(10)   | 1.545(3)   |
| C(8)–H(8A)   | 0.9900     |
| C(8)–H(8B)   | 0.9900     |
| C(9)–C(10)   | 1.556(3)   |
| C(9)–H(9A)   | 0.9900     |
| C(9)–H(9B)   | 0.9900     |
| C(10)–H(10)  | 1.0000     |
| N(2)–C(3)    | 1.358(3)   |
| N(2)–C(11)   | 1.465(2)   |
| C(11)–H(11A) | 0.9800     |
| C(11)–H(11B) | 0.9800     |
| C(11)–H(11C) | 0.9800     |
| C(3)–C(12)   | 1.491(3)   |
| C(12)–H(12A) | 0.9800     |
| C(12)–H(12B) | 0.9800     |
| C(12)–H(12C) | 0.9800     |

|                  |            |
|------------------|------------|
|                  |            |
| C(3)–N(1)–C(1)   | 104.18(16) |
| C(2)–C(1)–N(1)   | 113.14(16) |
| C(2)–C(1)–Br(1)  | 127.18(15) |
| N(1)–C(1)–Br(1)  | 119.67(14) |
| C(1)–C(2)–N(2)   | 103.30(16) |
| C(1)–C(2)–C(4)   | 130.84(17) |
| N(2)–C(2)–C(4)   | 125.80(17) |
| O(1)–C(4)–C(2)   | 112.68(16) |
| O(1)–C(4)–C(5)   | 106.50(15) |
| C(2)–C(4)–C(5)   | 114.47(17) |
| O(1)–C(4)–H(4)   | 107.6      |
| C(2)–C(4)–H(4)   | 107.6      |
| C(5)–C(4)–H(4)   | 107.6      |
| C(4)–O(1)–H(1O1) | 111(2)     |
| C(6)–C(5)–C(4)   | 115.06(16) |
| C(6)–C(5)–H(5A)  | 108.5      |
| C(4)–C(5)–H(5A)  | 108.5      |
| C(6)–C(5)–H(5B)  | 108.5      |
| C(4)–C(5)–H(5B)  | 108.5      |
| H(5A)–C(5)–H(5B) | 107.5      |
| C(5)–C(6)–C(7)   | 128.66(18) |
| C(5)–C(6)–C(8)   | 125.73(18) |
| C(7)–C(6)–C(8)   | 87.09(16)  |
| C(5)–C(6)–C(9)   | 127.90(17) |
| C(7)–C(6)–C(9)   | 86.96(17)  |
| C(8)–C(6)–C(9)   | 86.58(16)  |
| C(10)–C(7)–C(6)  | 74.58(15)  |
| C(10)–C(7)–H(7A) | 116.0      |
| C(6)–C(7)–H(7A)  | 116.0      |
| C(10)–C(7)–H(7B) | 116.0      |
| C(6)–C(7)–H(7B)  | 116.0      |
| H(7A)–C(7)–H(7B) | 113.0      |
| C(10)–C(8)–C(6)  | 74.55(15)  |
| C(10)–C(8)–H(8A) | 116.0      |
| C(6)–C(8)–H(8A)  | 116.0      |
| C(10)–C(8)–H(8B) | 116.0      |

|                     |            |
|---------------------|------------|
| C(6)–C(8)–H(8B)     | 116.0      |
| H(8A)–C(8)–H(8B)    | 113.0      |
| C(10)–C(9)–C(6)     | 74.17(15)  |
| C(10)–C(9)–H(9A)    | 116.1      |
| C(6)–C(9)–H(9A)     | 116.1      |
| C(10)–C(9)–H(9B)    | 116.1      |
| C(6)–C(9)–H(9B)     | 116.1      |
| H(9A)–C(9)–H(9B)    | 113.1      |
| C(8)–C(10)–C(7)     | 87.90(16)  |
| C(8)–C(10)–C(9)     | 87.25(17)  |
| C(7)–C(10)–C(9)     | 87.45(16)  |
| C(8)–C(10)–H(10)    | 127.0      |
| C(7)–C(10)–H(10)    | 127.0      |
| C(9)–C(10)–H(10)    | 127.0      |
| C(3)–N(2)–C(2)      | 107.94(16) |
| C(3)–N(2)–C(11)     | 125.96(17) |
| C(2)–N(2)–C(11)     | 126.10(17) |
| N(2)–C(11)–H(11A)   | 109.5      |
| N(2)–C(11)–H(11B)   | 109.5      |
| H(11A)–C(11)–H(11B) | 109.5      |
| N(2)–C(11)–H(11C)   | 109.5      |
| H(11A)–C(11)–H(11C) | 109.5      |
| H(11B)–C(11)–H(11C) | 109.5      |
| N(1)–C(3)–N(2)      | 111.43(17) |
| N(1)–C(3)–C(12)     | 123.87(19) |
| N(2)–C(3)–C(12)     | 124.69(17) |
| C(3)–C(12)–H(12A)   | 109.5      |
| C(3)–C(12)–H(12B)   | 109.5      |
| H(12A)–C(12)–H(12B) | 109.5      |
| C(3)–C(12)–H(12C)   | 109.5      |
| H(12A)–C(12)–H(12C) | 109.5      |
| H(12B)–C(12)–H(12C) | 109.5      |

---

Symmetry transformations used to generate equivalent atoms:

**Table S11.** Anisotropic displacement parameters ( $\text{\AA}^2 \times 10^3$ ) for (*R*)-**11**. The anisotropic displacement factor exponent takes the form:  $-2\pi^2 [h^2 a^{*2} U^{11} + \dots + 2 h k a^* b^* U^{12}]$

| Atom  | U <sup>11</sup> | U <sup>22</sup> | U <sup>33</sup> | U <sup>23</sup> | U <sup>13</sup> | U <sup>12</sup> |
|-------|-----------------|-----------------|-----------------|-----------------|-----------------|-----------------|
| N(1)  | 15(1)           | 18(1)           | 17(1)           | 2(1)            | 0(1)            | 0(1)            |
| C(1)  | 16(1)           | 17(1)           | 14(1)           | 0(1)            | 1(1)            | -2(1)           |
| Br(1) | 34(1)           | 24(1)           | 13(1)           | 1(1)            | -2(1)           | 0(1)            |
| C(2)  | 12(1)           | 17(1)           | 14(1)           | 0(1)            | 1(1)            | -2(1)           |
| C(4)  | 13(1)           | 18(1)           | 17(1)           | 0(1)            | -1(1)           | 2(1)            |
| O(1)  | 13(1)           | 21(1)           | 24(1)           | 7(1)            | 0(1)            | -1(1)           |
| C(5)  | 15(1)           | 16(1)           | 18(1)           | 2(1)            | 0(1)            | 1(1)            |
| C(6)  | 16(1)           | 16(1)           | 18(1)           | 2(1)            | 0(1)            | 0(1)            |
| C(7)  | 16(1)           | 20(1)           | 35(1)           | -2(1)           | 5(1)            | 2(1)            |
| C(8)  | 18(1)           | 19(1)           | 29(1)           | 4(1)            | -2(1)           | -3(1)           |
| C(9)  | 19(1)           | 32(1)           | 22(1)           | 0(1)            | -5(1)           | -3(1)           |
| C(10) | 14(1)           | 22(1)           | 32(1)           | 3(1)            | -3(1)           | 0(1)            |
| N(2)  | 16(1)           | 16(1)           | 13(1)           | 0(1)            | -1(1)           | 0(1)            |
| C(11) | 27(1)           | 23(1)           | 13(1)           | 2(1)            | -5(1)           | 0(1)            |
| C(3)  | 15(1)           | 17(1)           | 18(1)           | 1(1)            | 1(1)            | -1(1)           |
| C(12) | 28(1)           | 21(1)           | 24(1)           | -6(1)           | 1(1)            | 3(1)            |

**Table S12.** Hydrogen coordinates (  $\times 10^4$ ) and isotropic displacement parameters ( $\text{\AA}^2 \times 10^3$ ) for (*R*)-**11**.

| Atom   | x         | y        | z        | U(eq) |
|--------|-----------|----------|----------|-------|
| H(4)   | 835       | 5310     | 5089     | 19    |
| H(10I) | -1210(40) | 4640(30) | 4340(20) | 42(9) |
| H(5A)  | 1718      | 5809     | 3181     | 20    |
| H(5B)  | 1388      | 6933     | 3963     | 20    |
| H(7A)  | 4627      | 4106     | 4274     | 28    |
| H(7B)  | 4972      | 4814     | 3240     | 28    |
| H(8A)  | 4909      | 7106     | 3100     | 26    |
| H(8B)  | 4514      | 8043     | 4033     | 26    |
| H(9A)  | 4036      | 7069     | 5436     | 29    |
| H(9B)  | 4084      | 5407     | 5543     | 29    |
| H(10)  | 6662      | 6175     | 4569     | 27    |
| H(11A) | 272       | 3737     | 2659     | 32    |
| H(11B) | 911       | 2321     | 2284     | 32    |
| H(11C) | 2007      | 3611     | 2329     | 32    |
| H(12A) | 2060      | 586      | 2621     | 37    |
| H(12B) | 2174      | -404     | 3512     | 37    |
| H(12C) | 3662      | 352      | 3131     | 37    |



**Table S13.** Torsion angles [°] for (*R*)-**11**.

|                      |             |
|----------------------|-------------|
| C(3)–N(1)–C(1)–C(2)  | –0.8(2)     |
| C(3)–N(1)–C(1)–Br(1) | 178.17(14)  |
| N(1)–C(1)–C(2)–N(2)  | 0.6(2)      |
| Br(1)–C(1)–C(2)–N(2) | –178.32(15) |
| N(1)–C(1)–C(2)–C(4)  | –176.8(2)   |
| Br(1)–C(1)–C(2)–C(4) | 4.4(3)      |
| C(1)–C(2)–C(4)–O(1)  | –124.4(2)   |
| N(2)–C(2)–C(4)–O(1)  | 58.8(3)     |
| C(1)–C(2)–C(4)–C(5)  | 113.7(2)    |
| N(2)–C(2)–C(4)–C(5)  | –63.1(3)    |
| O(1)–C(4)–C(5)–C(6)  | –178.18(16) |
| C(2)–C(4)–C(5)–C(6)  | –53.0(2)    |
| C(4)–C(5)–C(6)–C(7)  | 70.5(3)     |
| C(4)–C(5)–C(6)–C(8)  | –169.81(18) |
| C(4)–C(5)–C(6)–C(9)  | –52.0(3)    |
| C(5)–C(6)–C(7)–C(10) | 178.1(2)    |
| C(8)–C(6)–C(7)–C(10) | 43.00(15)   |
| C(9)–C(6)–C(7)–C(10) | –43.73(15)  |
| C(5)–C(6)–C(8)–C(10) | 179.7(2)    |
| C(7)–C(6)–C(8)–C(10) | –43.07(15)  |
| C(9)–C(6)–C(8)–C(10) | 44.05(15)   |
| C(5)–C(6)–C(9)–C(10) | –177.8(2)   |
| C(7)–C(6)–C(9)–C(10) | 43.51(15)   |
| C(8)–C(6)–C(9)–C(10) | –43.75(15)  |
| C(6)–C(8)–C(10)–C(7) | 43.35(14)   |
| C(6)–C(8)–C(10)–C(9) | –44.20(14)  |
| C(6)–C(7)–C(10)–C(8) | –43.45(15)  |
| C(6)–C(7)–C(10)–C(9) | 43.89(14)   |
| C(6)–C(9)–C(10)–C(8) | 44.22(14)   |
| C(6)–C(9)–C(10)–C(7) | –43.80(15)  |
| C(1)–C(2)–N(2)–C(3)  | –0.1(2)     |
| C(4)–C(2)–N(2)–C(3)  | 177.40(19)  |
| C(1)–C(2)–N(2)–C(11) | –179.69(18) |
| C(4)–C(2)–N(2)–C(11) | –2.2(3)     |
| C(1)–N(1)–C(3)–N(2)  | 0.7(2)      |

|                       |            |
|-----------------------|------------|
| C(1)–N(1)–C(3)–C(12)  | –178.1(2)  |
| C(2)–N(2)–C(3)–N(1)   | –0.4(2)    |
| C(11)–N(2)–C(3)–N(1)  | 179.19(18) |
| C(2)–N(2)–C(3)–C(12)  | 178.43(19) |
| C(11)–N(2)–C(3)–C(12) | –2.0(3)    |

---

Symmetry transformations used to generate equivalent atoms:

**Table S14.** Hydrogen bonds for (*R*)-**11** [Å and °].

---

| D–H...A                  | d(D–H)  | d(H...A) | d(D...A) | <(DHA) |
|--------------------------|---------|----------|----------|--------|
| O(1)–<br>H(1O1)...N(1)#1 | 0.78(4) | 2.05(4)  | 2.824(2) | 173(3) |

---

Symmetry transformations used to generate equivalent atoms:

#1  $x-1/2, -y+1/2, -z+1$

## 5. Biological Data

|               |                                 | 6a     |       |                    |         |     |
|---------------|---------------------------------|--------|-------|--------------------|---------|-----|
|               |                                 | IC50   | I max | Max Inhibition (%) | p val   |     |
| LPS-triggered | NFκB-driven Luciferase activity | 1pM    | 100nM | 46 ± 11            | *       |     |
|               | Cytokine release                | IL-4   | 100fM | 10pM               | 70 ± 7  | *** |
|               |                                 | MCP-1  |       |                    | 48 ± 7  | **  |
|               |                                 | MIP-1α |       |                    | 42 ± 7  | **  |
|               |                                 | TNF-α  |       |                    | 41 ± 7  | **  |
|               |                                 | IL-1β  |       |                    | 39 ± 17 | ns  |
|               |                                 | IL-13  |       |                    | 30 ± 22 | ns  |
|               |                                 | GM-CSF |       |                    | 26 ± 14 | *   |
|               |                                 | IL-6   |       |                    | 24 ± 12 | *   |

**Table S15. Pharmacodynamic (PD) analysis of the effects of BCP-sLXms 6a on NFκB activity.** THP-1 LUCIA monocytes were treated with appropriate controls or BCP-sLXms, as described in Figure legend 2. The table summarises the effects of **6a** on LPS-induced NF-κB activity in monocytes by measuring maximal inhibitory concentration (Imax), half-maximal inhibitory concentration (IC<sub>50</sub>) and maximal activity (%), as a measure of efficacy and potency relative to LPS-induced response (set at 100%). Statistical analysis was carried out by using Student's unpaired 2-tailed T-test of tested compound vs LPS (ns p = not significant; \* p < 0.05; \*\* p < 0.01; \*\*\* p < 0.001).

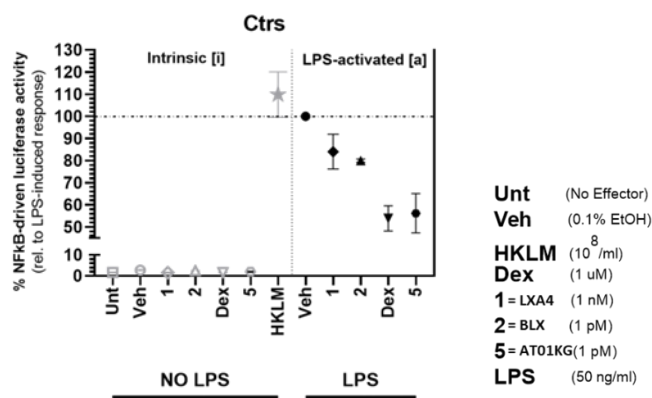

**Figure S7. NF-κB activity assay experimental controls.** % relative luminescence unit (RLU) indicating NF-κB-driven luciferase activity for the various controls used in presence and absence of LPS challenge (as displayed in figure legend).

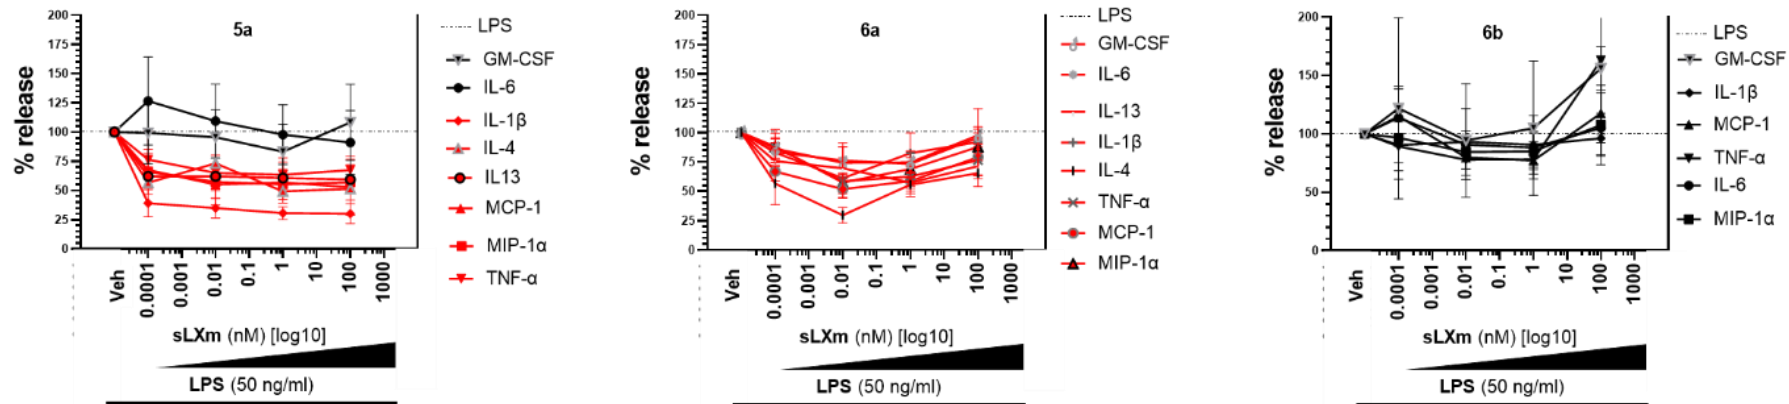

**Figure S8. Complete Th1 pro-inflammatory cytokines analysis.**  $1 \times 10^5$  THP-1 LUCIA monocytes were pre-treated for 30 mins at indicated concentrations with **5a**, **6a** or **6b**. After 24 h from the subsequent stimulation with LPS, supernatants were collected and a panel of 8 pro-inflammatory cytokine levels were measured (MIP-1a, MCP-1, TNF-a, IL-1b, IL-6, IL-13, GM-CSF and IL-4). Dose-response curves show downregulated (red) or unmodified (black) cytokines. Statistical analysis was carried out by using Student's unpaired 2-tailed T-test of tested compound vs LPS.

# Cyto-/chemo-kine ABUNDANCY in THP-1 Monocyte Releasate

## MIP-1 $\alpha$

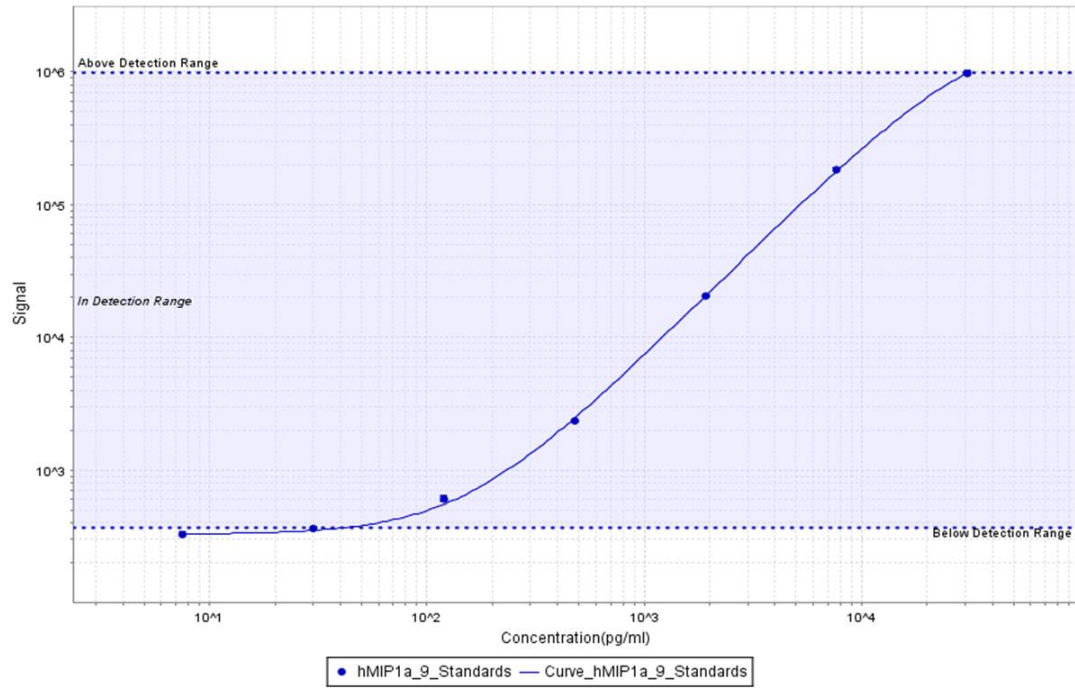

## MCP-1

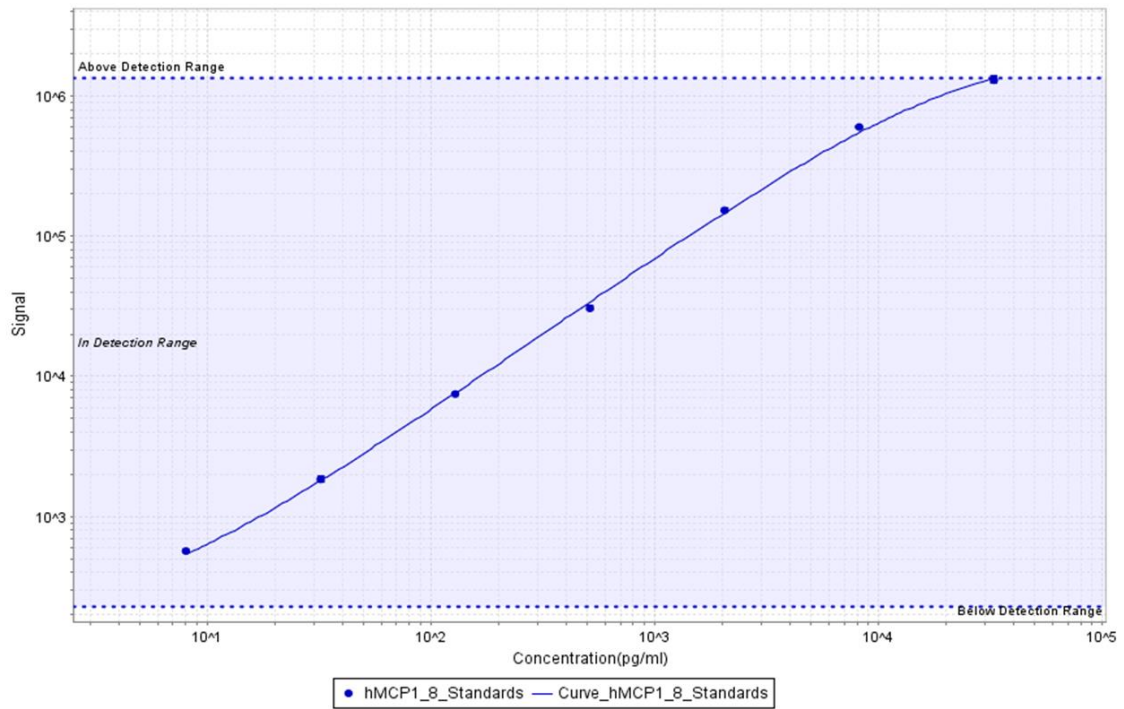

### TNF- $\alpha$

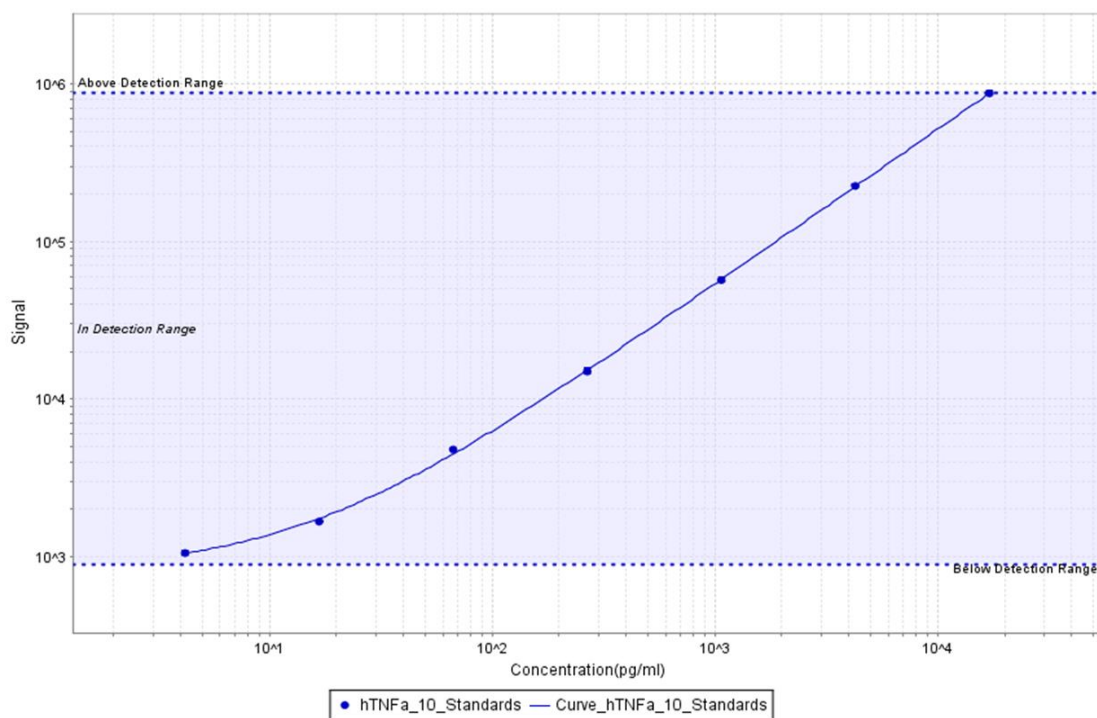

### IL-1 $\beta$

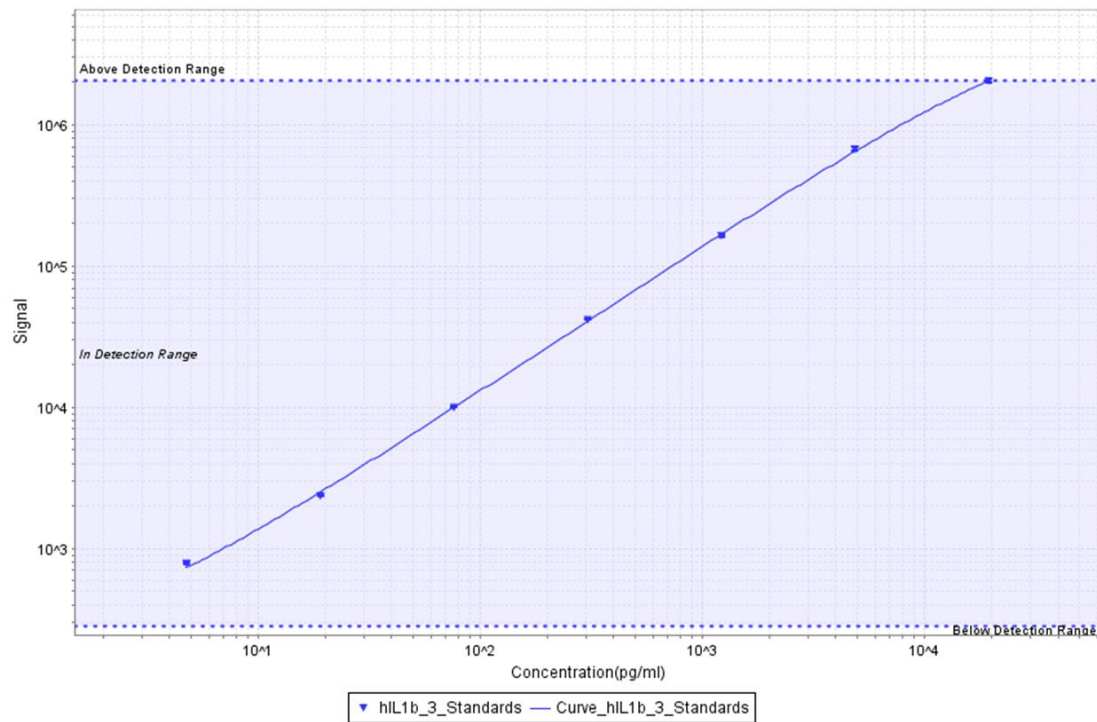

### IL-6

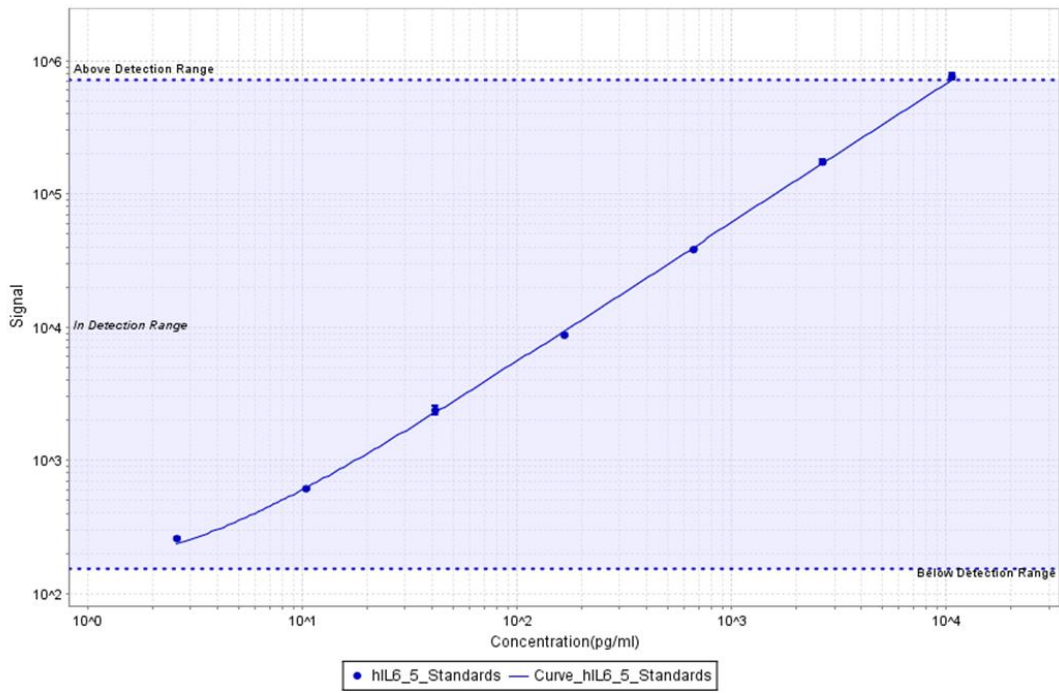

### IL-13

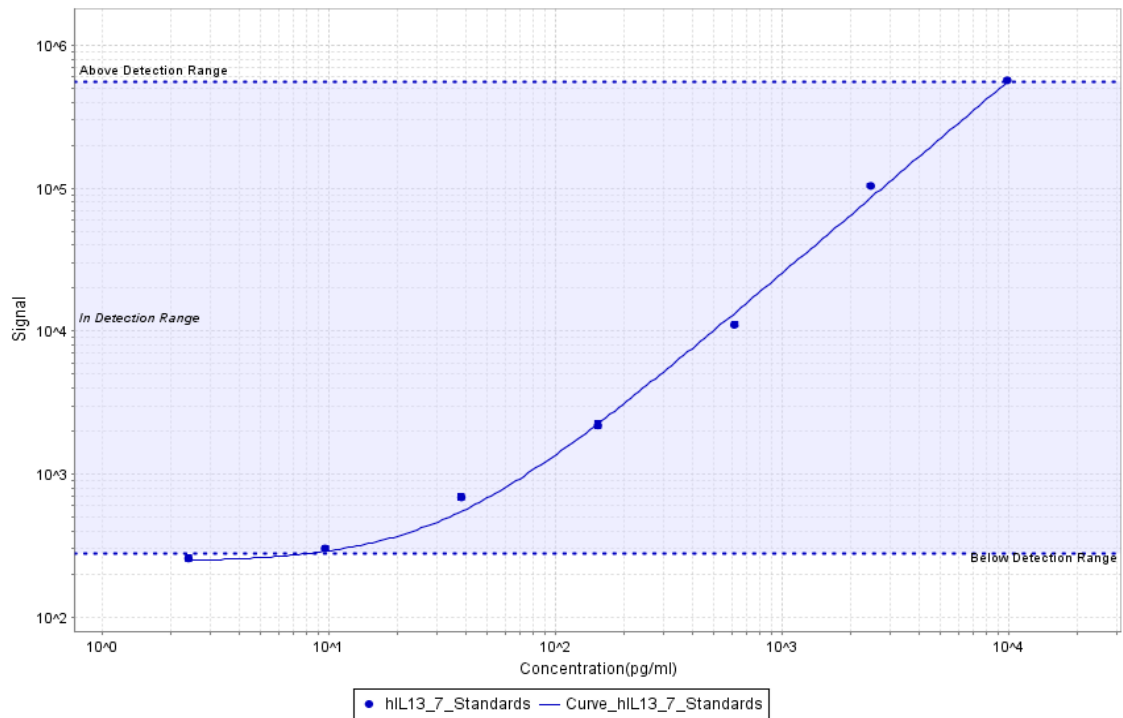

### GM-CSF

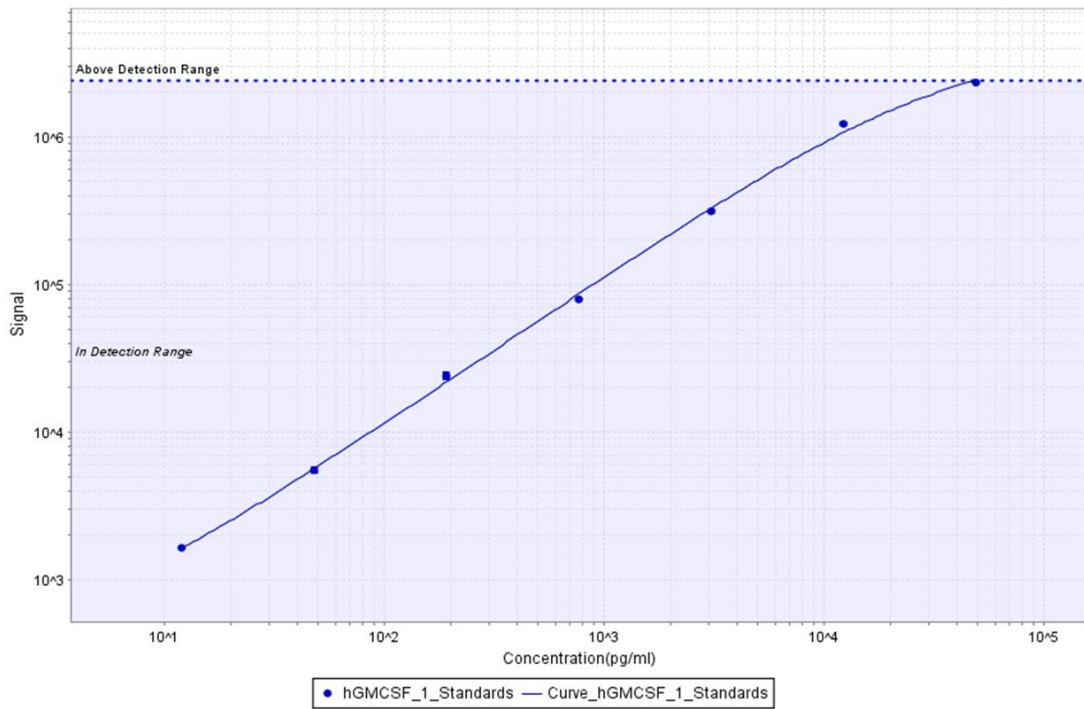

### IL-4

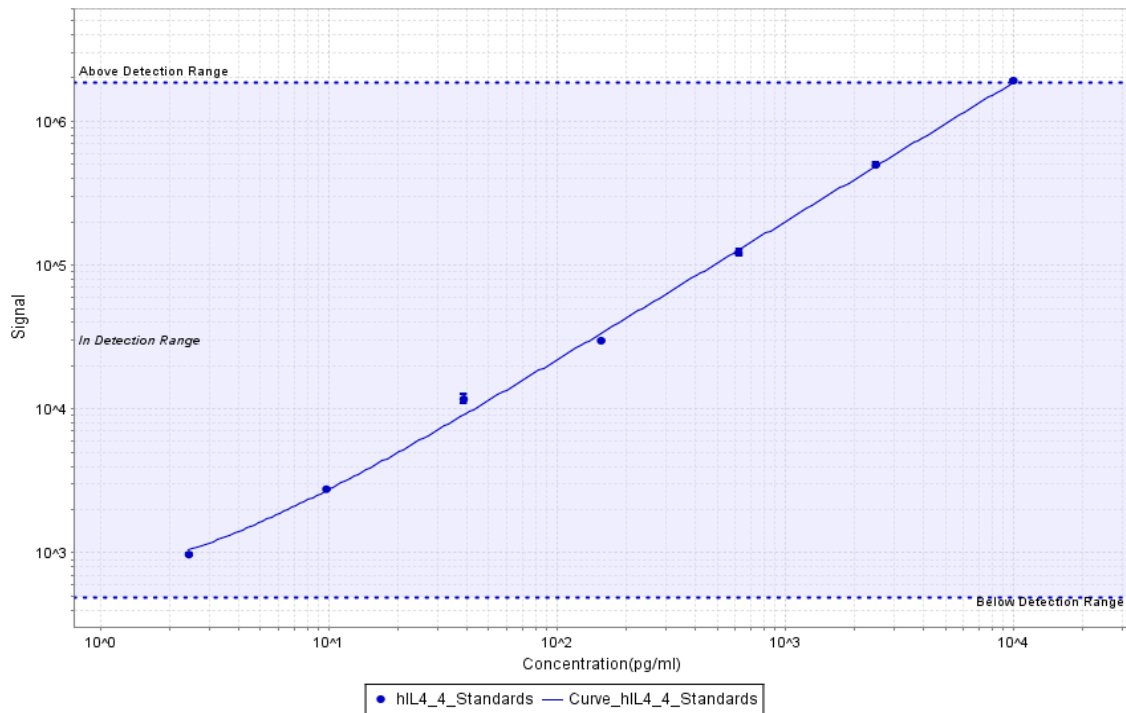

**Figure S9 - Standard curves for electrochemiluminescence detection of Th1 pro-inflammatory cytokines.** Using a multiplex electrochemiluminescence technology, MIP-1a, MCP-1, TNF-a, IL-1b, IL-6, IL-13, GM-CSF and IL-4 levels were all detected within the standard range, therefore, no dilution of sample was required prior to perform the assay.



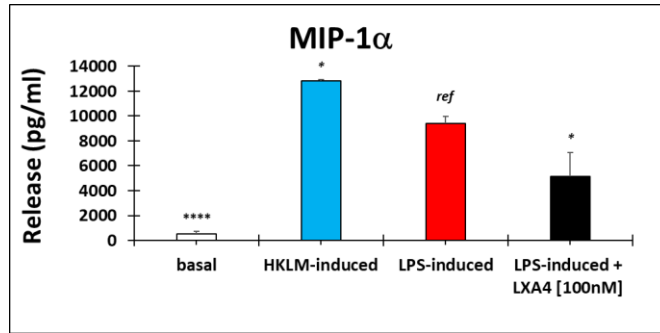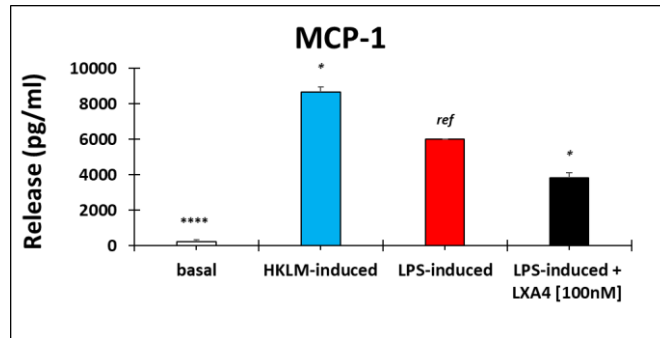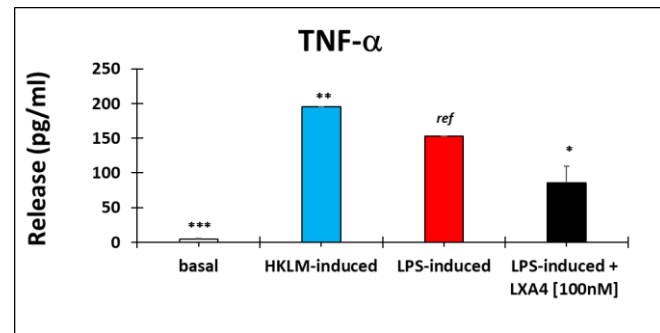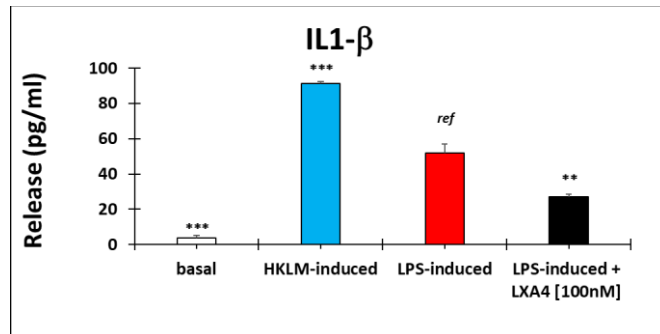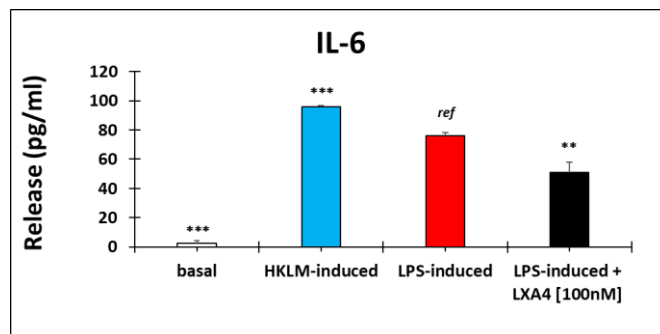

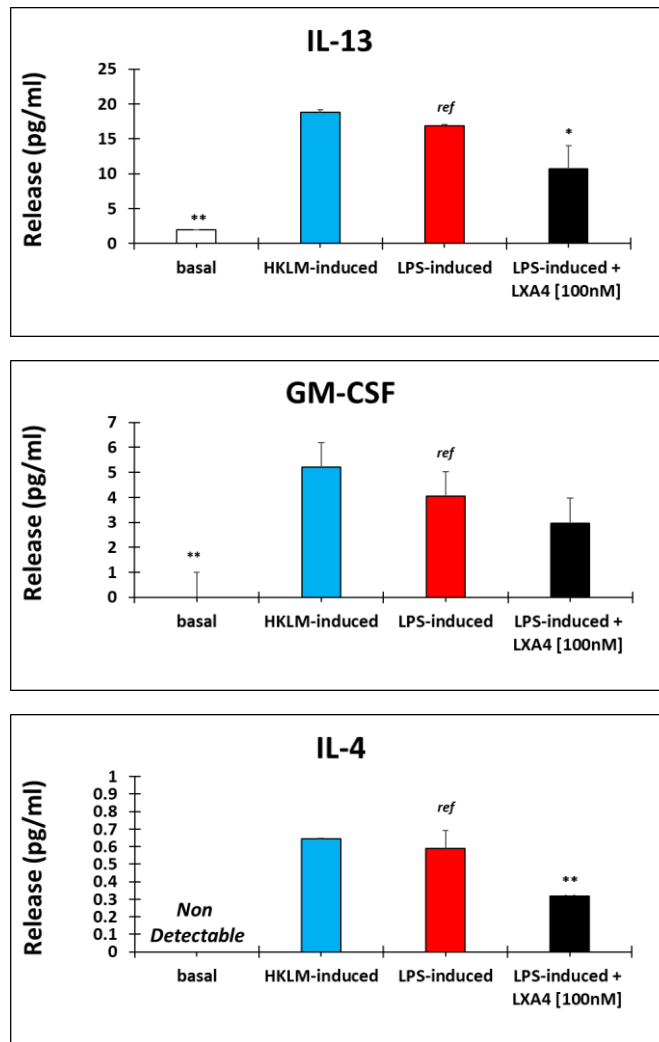

**Figure S10 - Control for electrochemiluminescence detection of Th1 pro-inflammatory cytokines.** Using a multiplex electrochemiluminescence technology, MIP-1a, MCP-1, TNF-a, IL-1b, IL-6, IL-13, GM-CSF and IL-4 levels were measured as pg/mL after treatment with vehicle (0.01% EtOH), HKLM ( $10^8$ /ml), 50ng/mL LPs or LXA4 (100nM).

## 6. References

- (1) de Gaetano, M.; Tighe, C.; Gahan, K.; Zanetti, A.; Chen, J.; Newson, J.; Cacace, A.; Marai, M.; Gaffney, A.; Brennan, E.; Kantharidis, P.; Cooper, M. E.; Leroy, X.; Perretti, M.; Gilroy, D.; Godson, C.; Guiry, P. J. Asymmetric Synthesis and Biological Screening of Quinoxaline-Containing Synthetic Lipoxin A4 Mimetics (QNX-SLXms). *J. Med. Chem.* **2021**, *64* (13), 9193–9216. <https://doi.org/10.1021/acs.jmedchem.1c00403>.
- (2) Gianatassio, R.; Lopchuk, J. M.; Wang, J.; Pan, C.-M.; Malins, L. R.; Prieto, L.; Brandt, T. A.; Collins, M. R.; Gallego, G. M.; Sach, N. W.; Spangler, J. E.; Zhu, H.; Zhu, J.; Baran, P. S. Strain-Release Amination. *Science* **2016**, *351* (6270), 241–246. <https://doi.org/10.1126/science.aad6252>.
- (3) Wang, Z.; Wang, L.; Wang, Z.; Li, P.; Zhang, Y. A Practical Synthesis of  $\alpha$ -Bromo/Iodo/Chloroketones from Olefins under Visible-Light Irradiation Conditions. *Chin. Chem. Lett.* **2021**, *32* (1), 429–432. <https://doi.org/10.1016/j.ccllet.2020.02.022>.
- (4) de Gaetano, M.; Butler, E.; Gahan, K.; Zanetti, A.; Marai, M.; Chen, J.; Cacace, A.; Hams, E.; Maingot, C.; McLoughlin, A.; Brennan, E.; Leroy, X.; Loscher, C. E.; Fallon, P.; Perretti, M.; Godson, C.; Guiry, P. J. Asymmetric Synthesis and Biological Evaluation of Imidazole- and Oxazole-Containing Synthetic Lipoxin A4 Mimetics (SLXms). *Eur. J. Med. Chem.* **2019**, *162*, 80–108. <https://doi.org/10.1016/j.ejmech.2018.10.049>.

## 7. NMR Spectra

### (3aR,7aS)-2,2-dimethyltetrahydro-4H-[1,3]dioxolo[4,5-c]pyran-6-ol (S1)

$^1\text{H-NMR}$  (400 MHz,  $\text{CDCl}_3$ ):

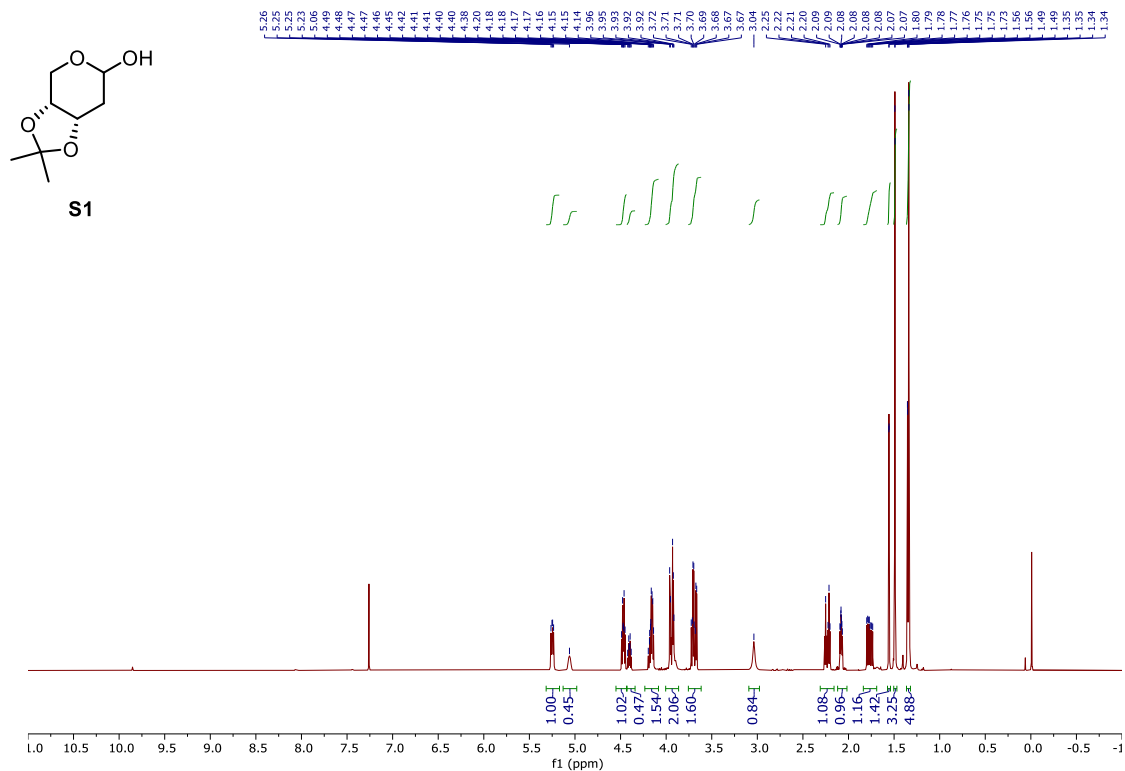

$^{13}\text{C-NMR}$  (101 MHz,  $\text{CDCl}_3$ ):

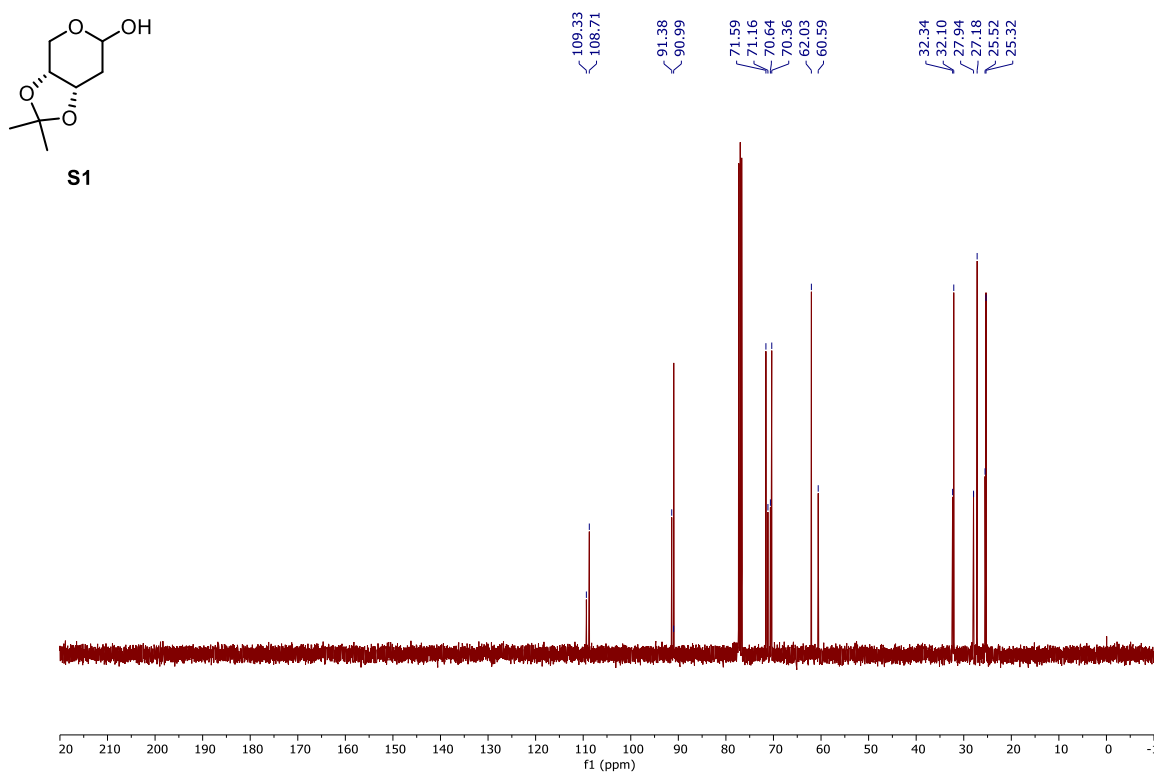

# methyl-4-((4S,5R)-5-(hydroxymethyl)-2,2-dimethyl-1,3-dioxolan-4-yl)but-2-enoate (S2)

<sup>1</sup>H-NMR (400 MHz, CDCl<sub>3</sub>):

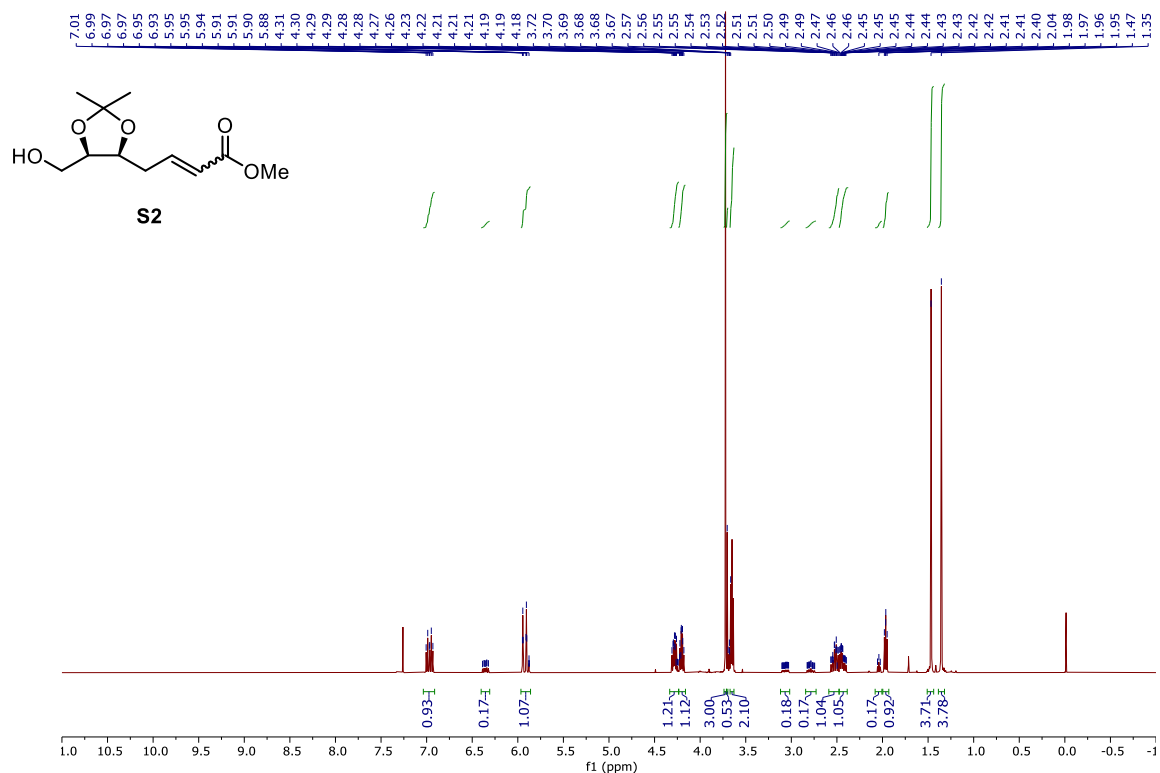

<sup>13</sup>C-NMR (101 MHz, CDCl<sub>3</sub>):

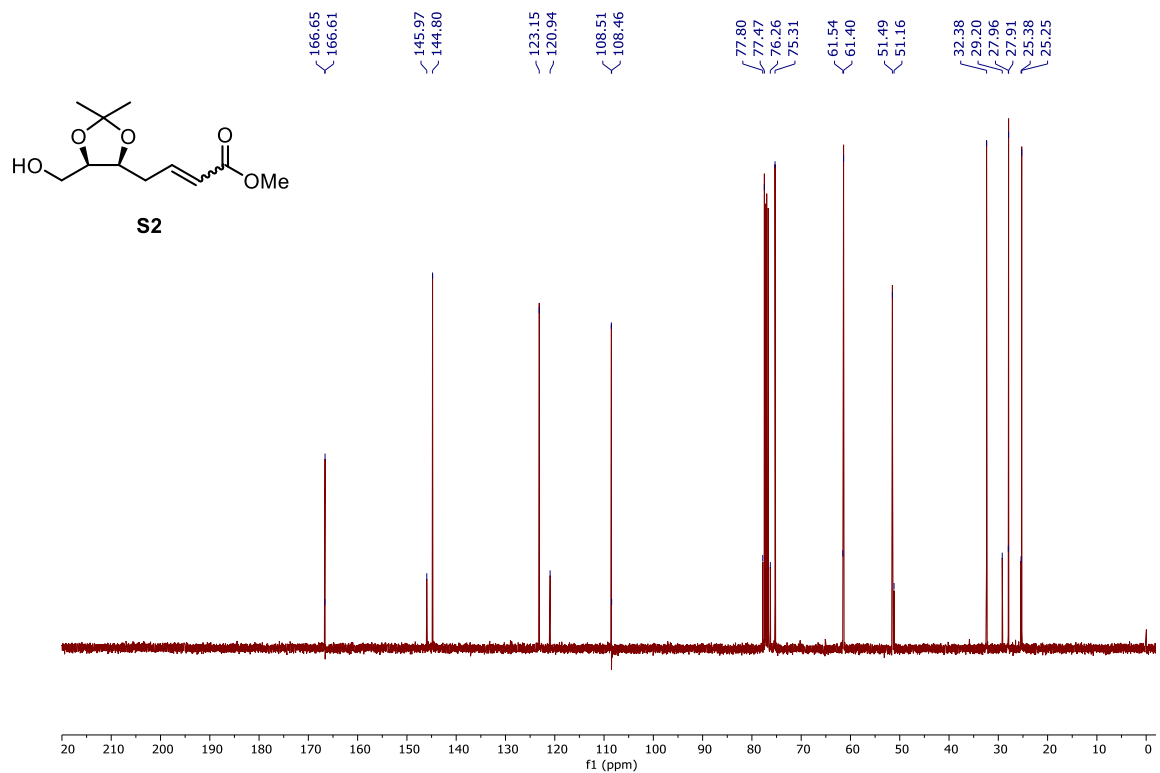

# methyl 4-((4S,5R)-5-(hydroxymethyl)-2,2-dimethyl-1,3-dioxolan-4-yl)butanoate (S3)

<sup>1</sup>H-NMR (400 MHz, CDCl<sub>3</sub>):

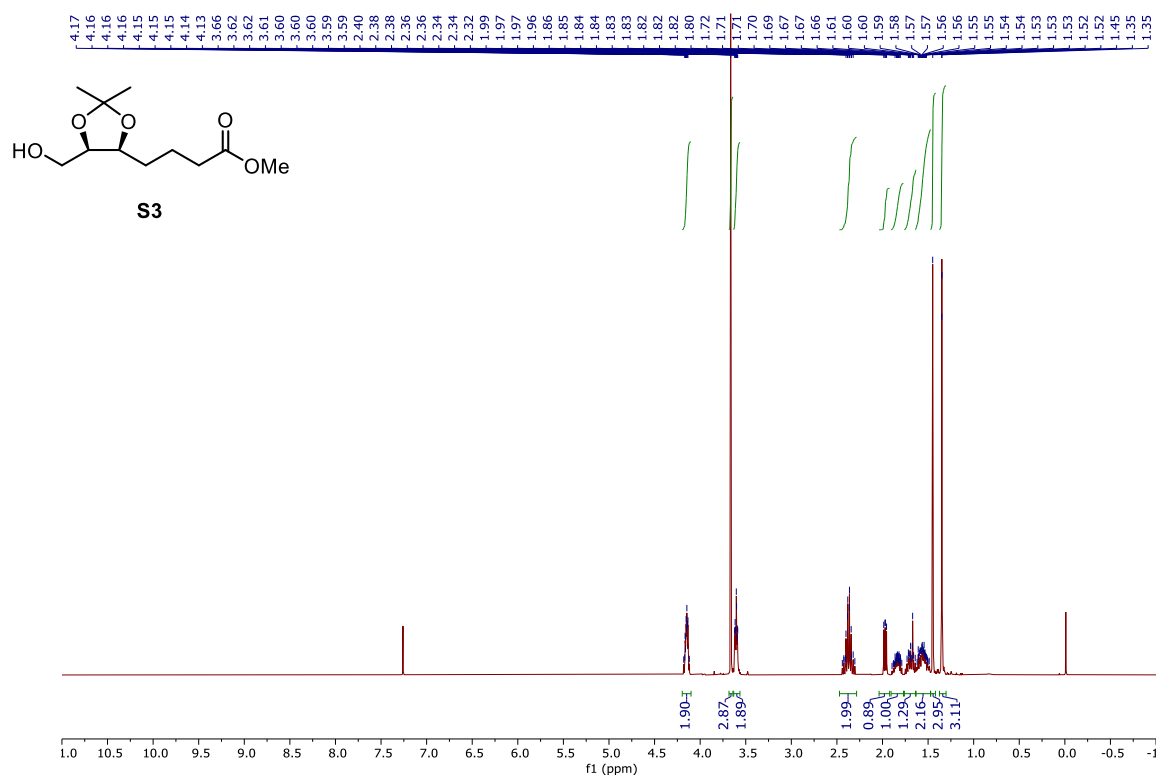

<sup>13</sup>C-NMR (101 MHz, CDCl<sub>3</sub>):

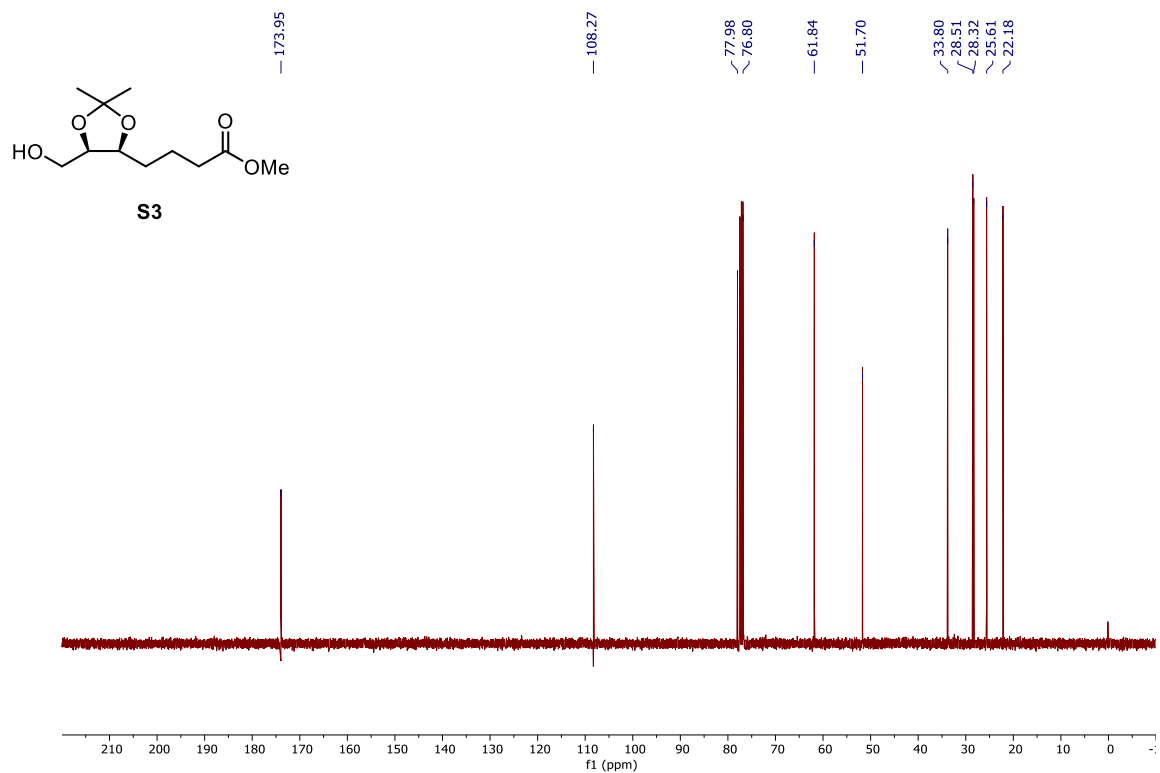

# methyl 4-((4S,5S)-5-formyl-2,2-dimethyl-1,3-dioxolan-4-yl)butanoate (S4)

<sup>1</sup>H-NMR (400 MHz, CDCl<sub>3</sub>):

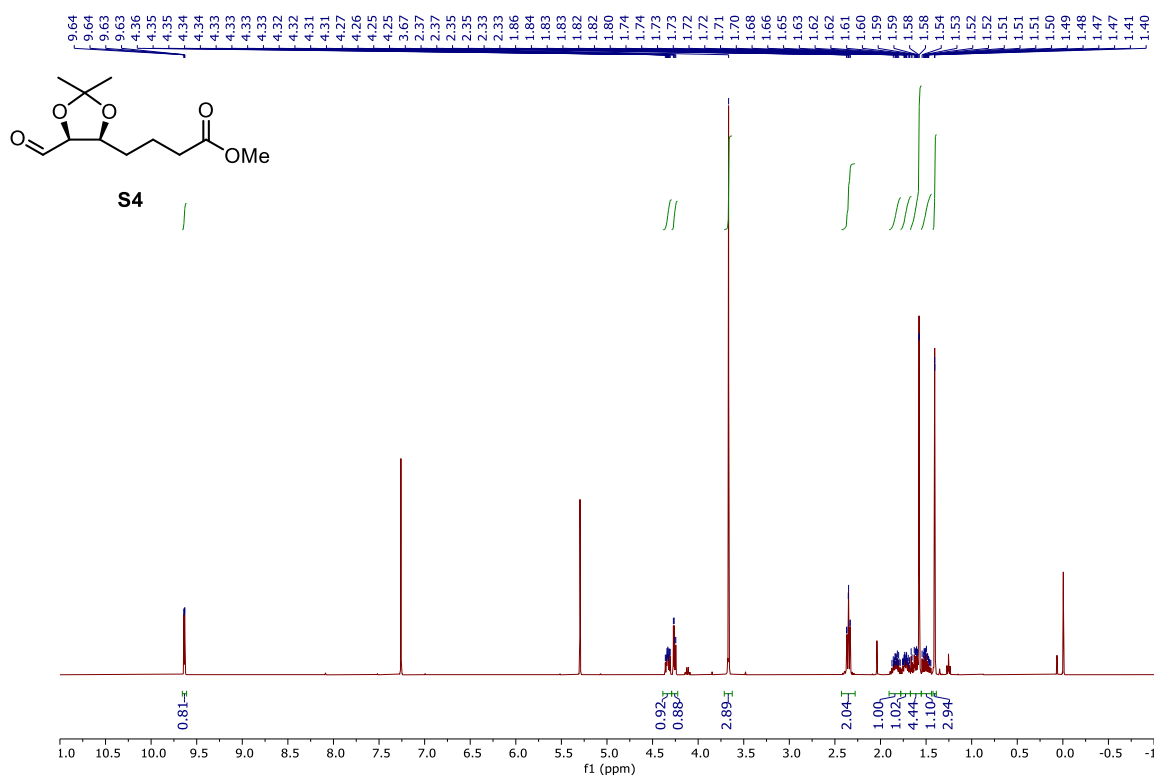

<sup>13</sup>C-NMR (101 MHz, CDCl<sub>3</sub>):

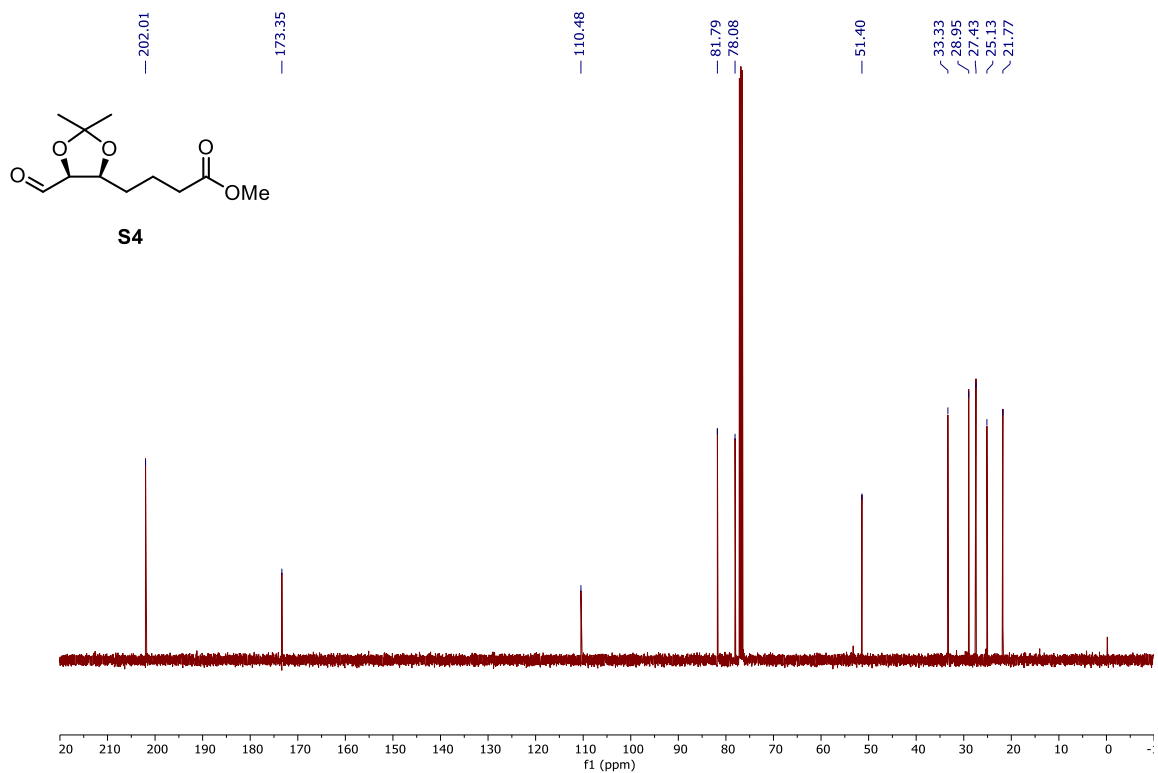

## 2-(dichloromethyl)-4,4,5,5-tetramethyl-1,3,2-dioxaborolane (S5)

$^1\text{H-NMR}$  (400 MHz,  $\text{CDCl}_3$ ):

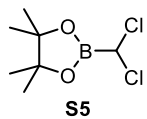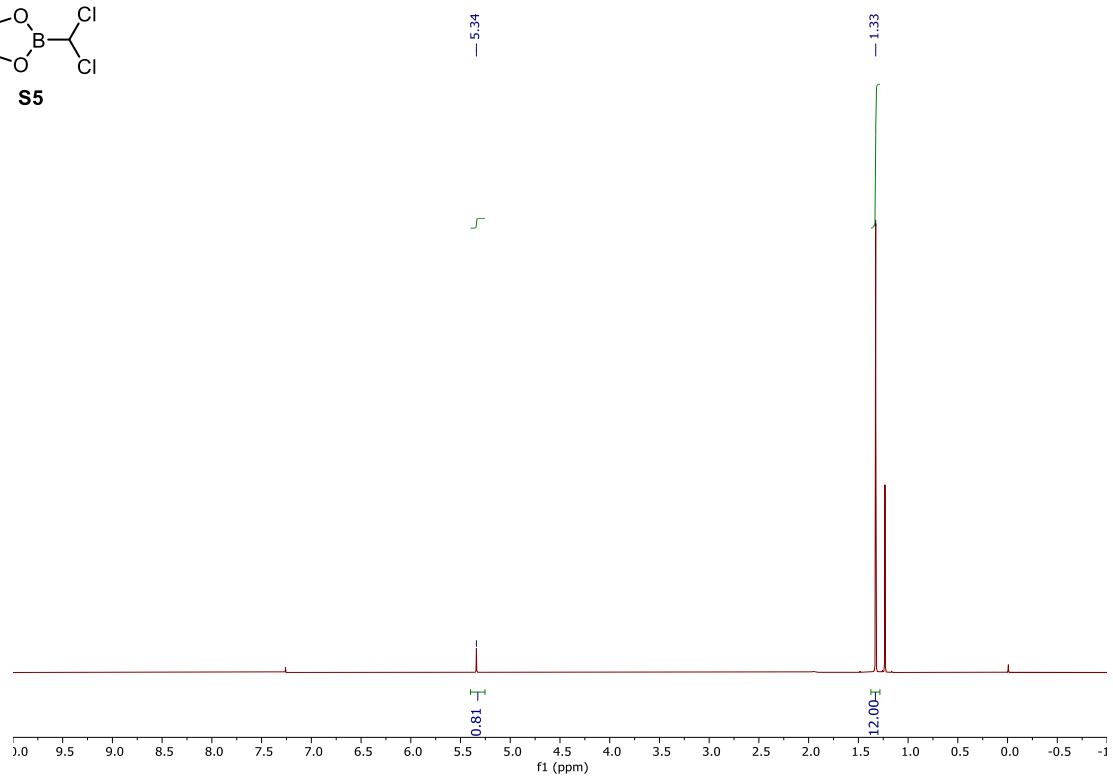

$^{13}\text{C-NMR}$  (101 MHz,  $\text{CDCl}_3$ ):

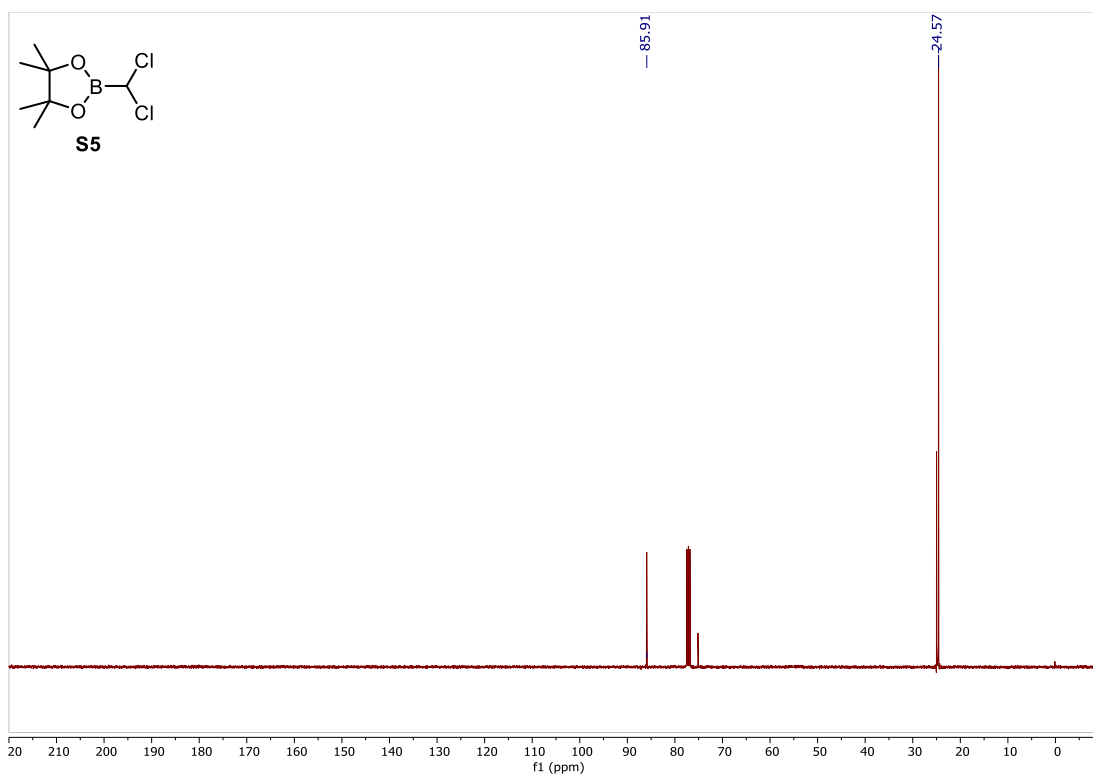



**methyl 4-((4S,5R)-2,2-dimethyl-5-((E)-2-(4,4,5,5-tetramethyl-1,3,2-dioxaborolan-2-yl)vinyl)-1,3-dioxolan-4-yl)butanoate (10)**

**<sup>1</sup>H-NMR (400 MHz, CDCl<sub>3</sub>):**

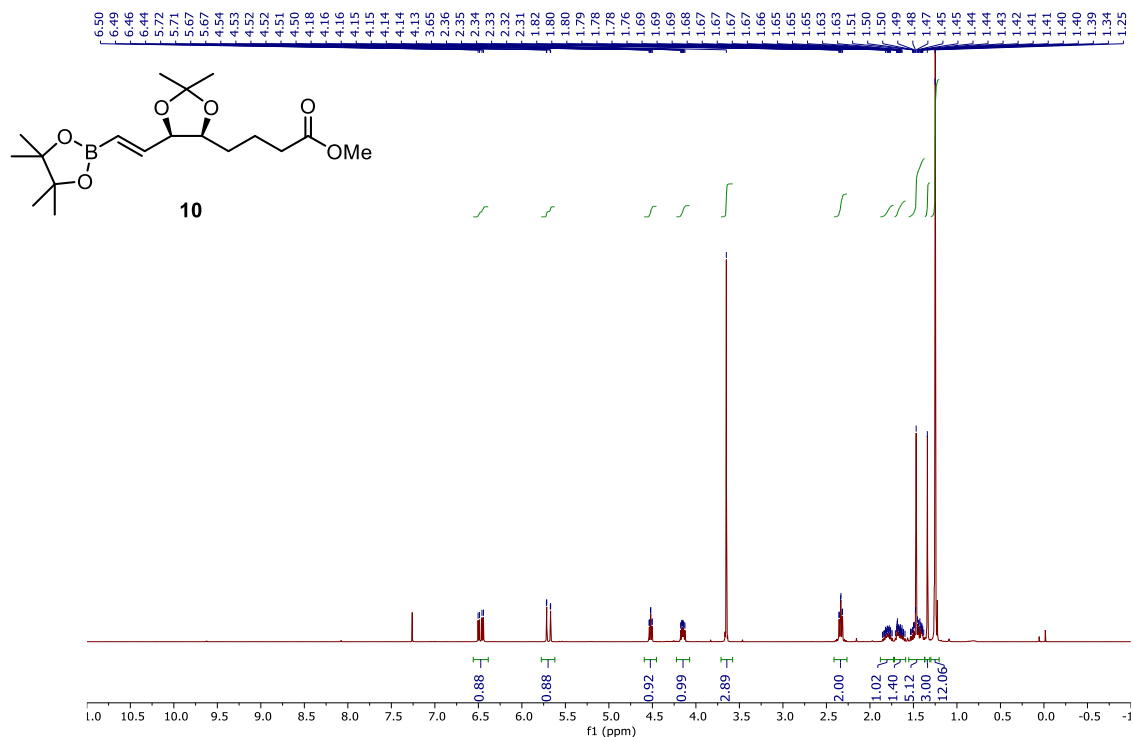

**<sup>13</sup>C-NMR:**

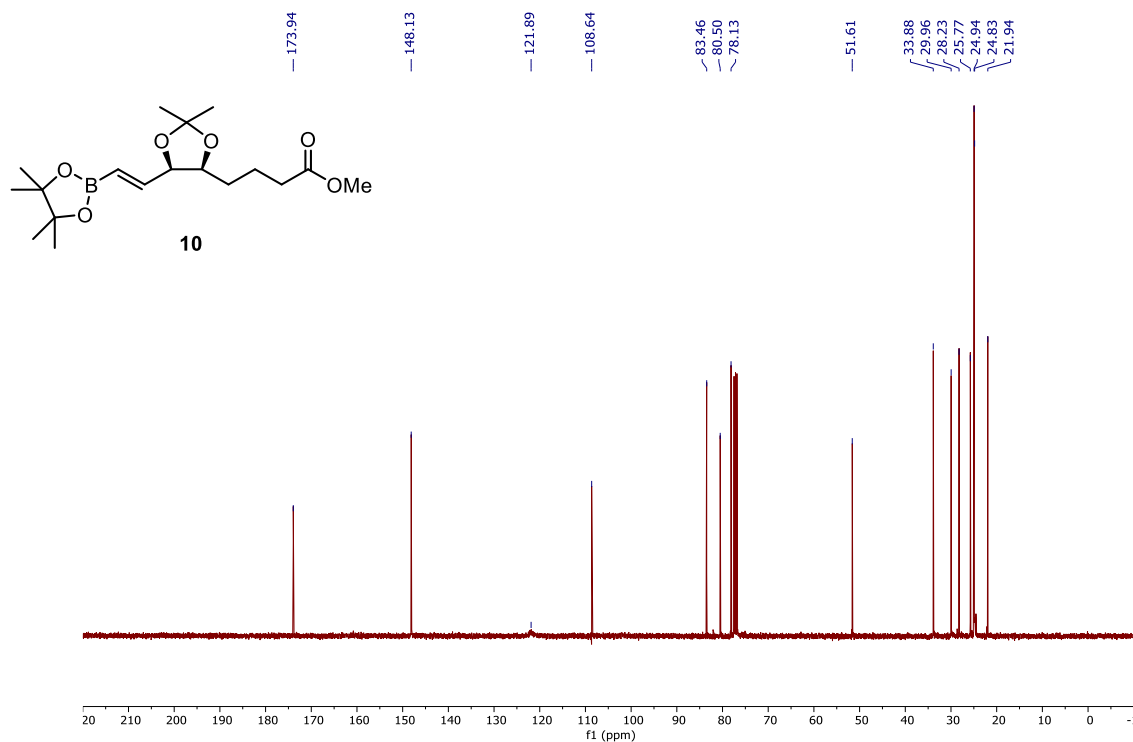

# 1-(2-bromophenyl)-2-iodoethan-1-one (12)

<sup>1</sup>H-NMR (400 MHz, CDCl<sub>3</sub>):

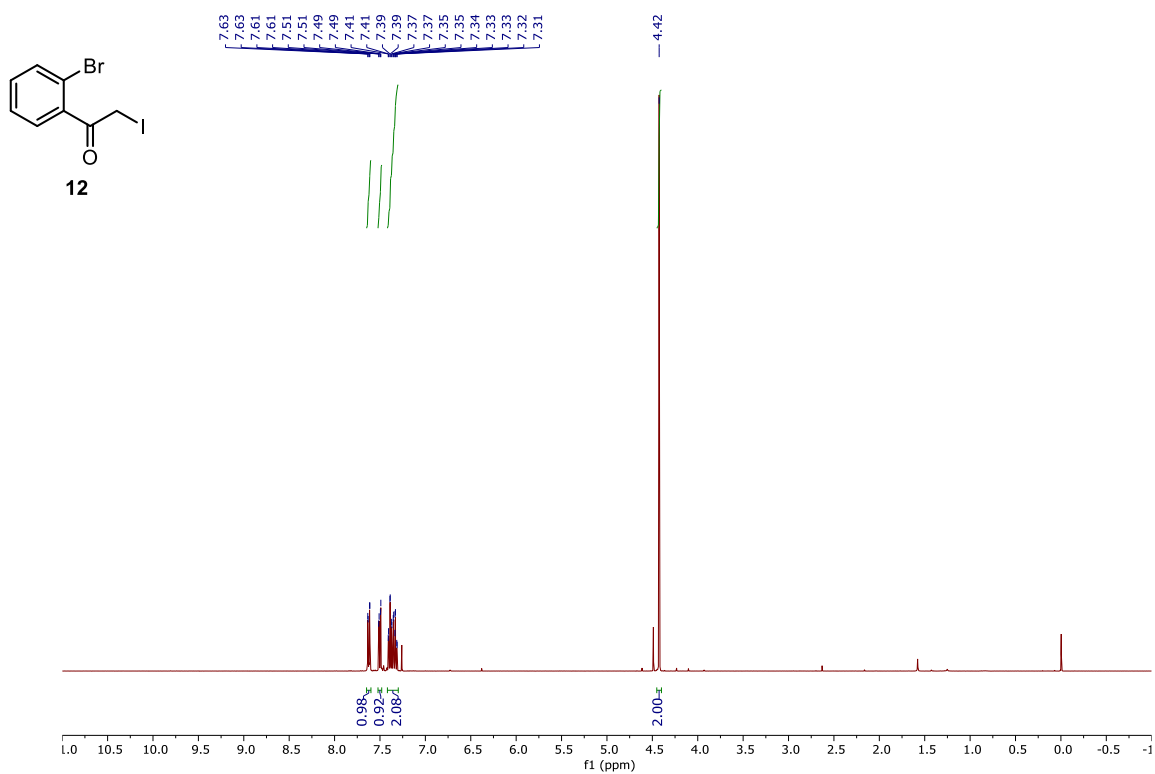

<sup>13</sup>C-NMR (101 MHz, CDCl<sub>3</sub>):

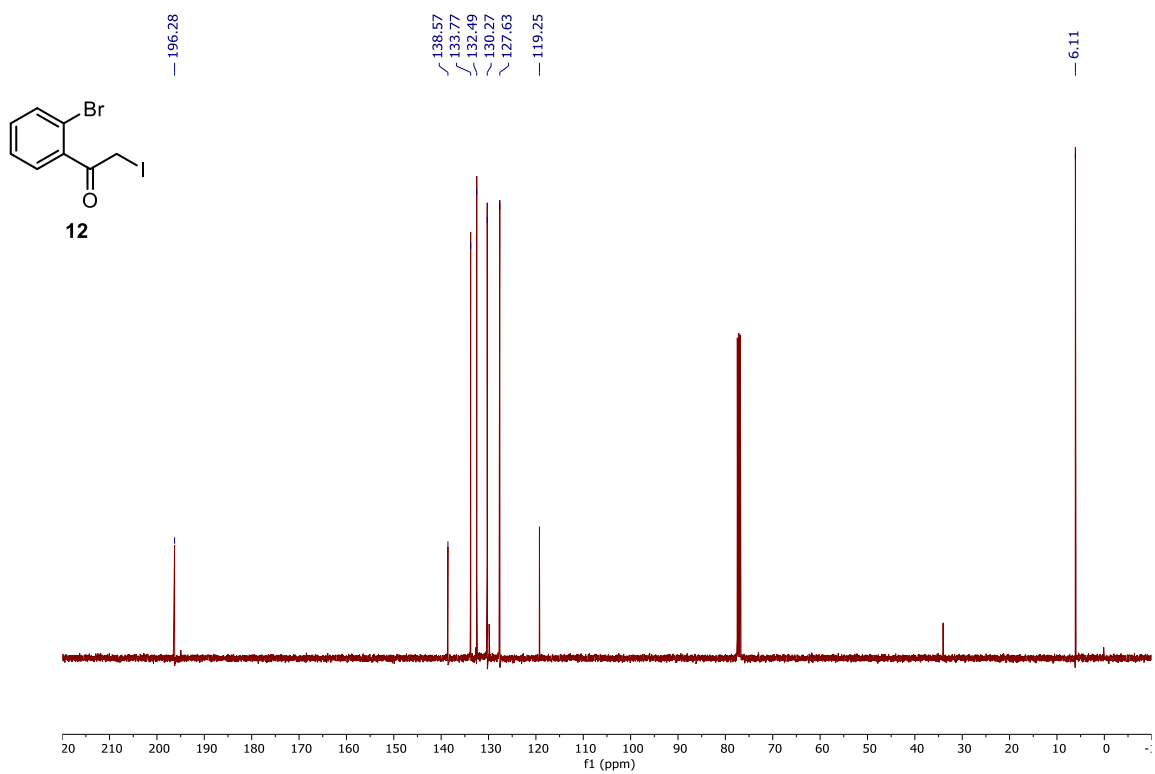

**2-(bicyclo[1.1.1]pentan-1-yl)-1-(2-bromophenyl)ethan-1-one (9) and 2-(bicyclo[1.1.1]pentan-1-yl)-1-phenylethan-1-one (18)**

<sup>1</sup>H-NMR (400 MHz, CDCl<sub>3</sub>):

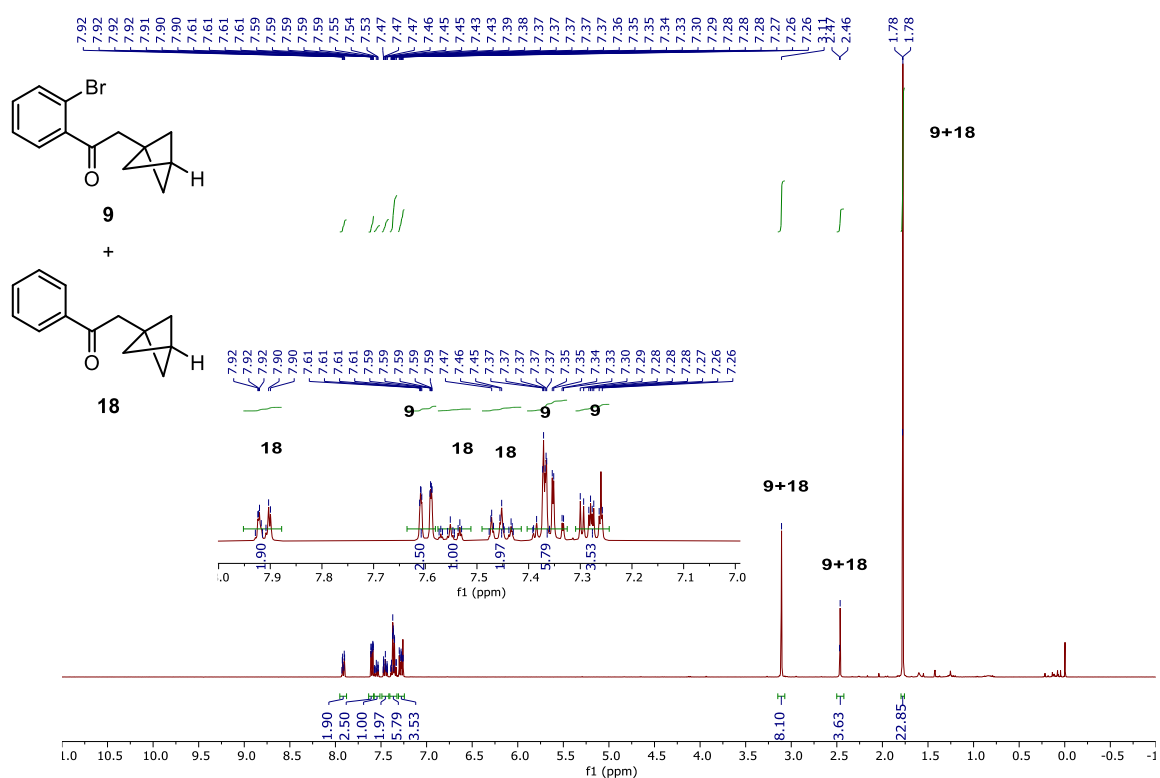

<sup>13</sup>C-NMR (101 MHz, CDCl<sub>3</sub>):

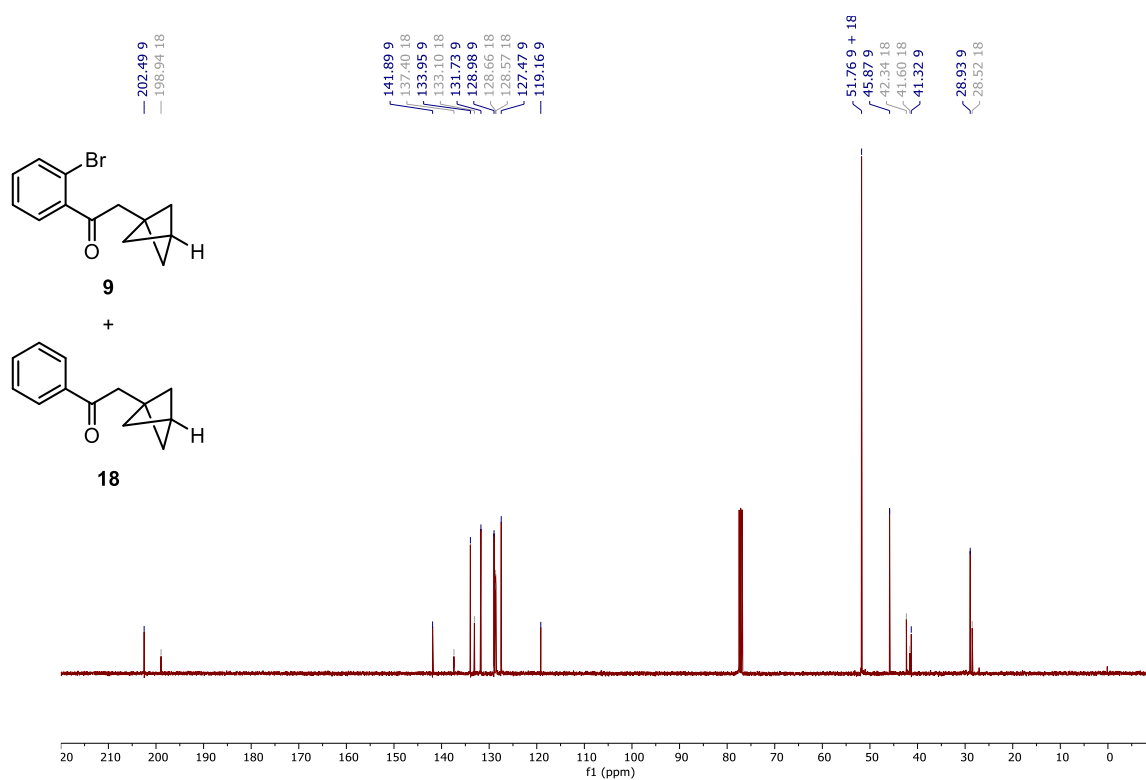

**methyl 4-((4*S*,5*R*)-5-((*E*)-2-(2-(bicyclo[1.1.1]pentan-1-yl)acetyl)styryl)-2,2-dimethyl-1,3-dioxolan-4-yl)butanoate (7)**

**<sup>1</sup>H-NMR (400 MHz, CDCl<sub>3</sub>):**

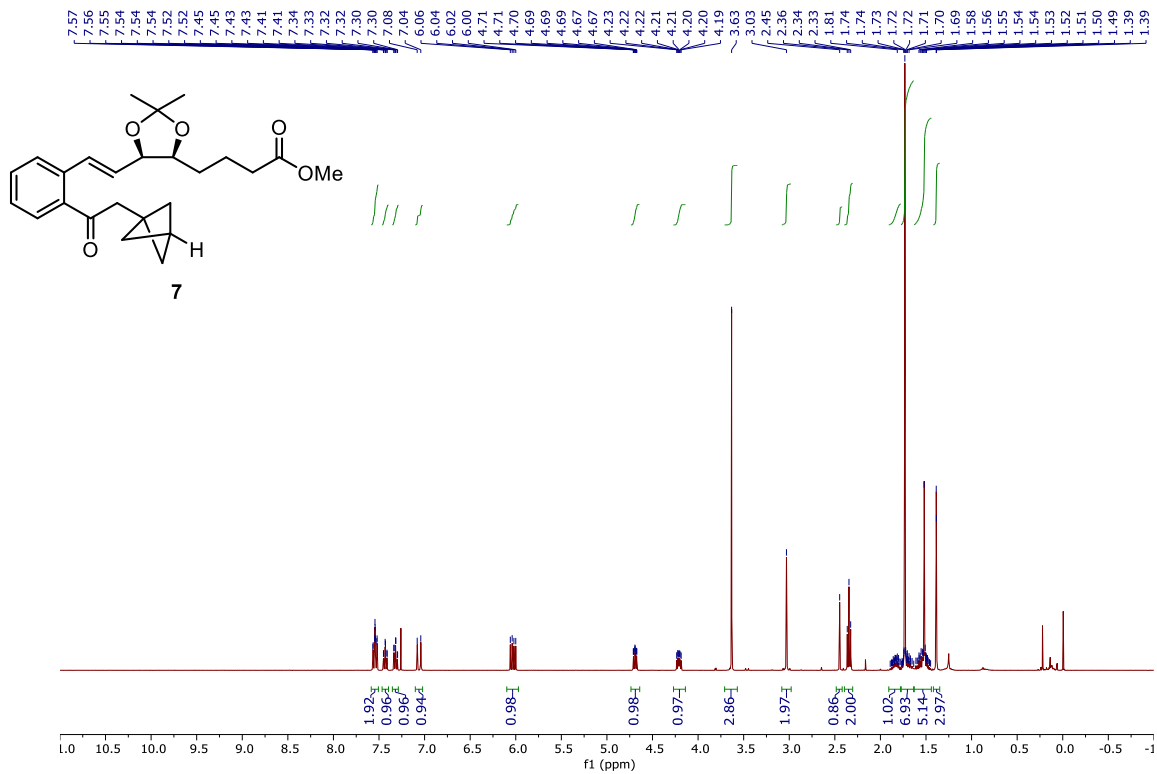

**<sup>13</sup>C-NMR (101 MHz, CDCl<sub>3</sub>):**

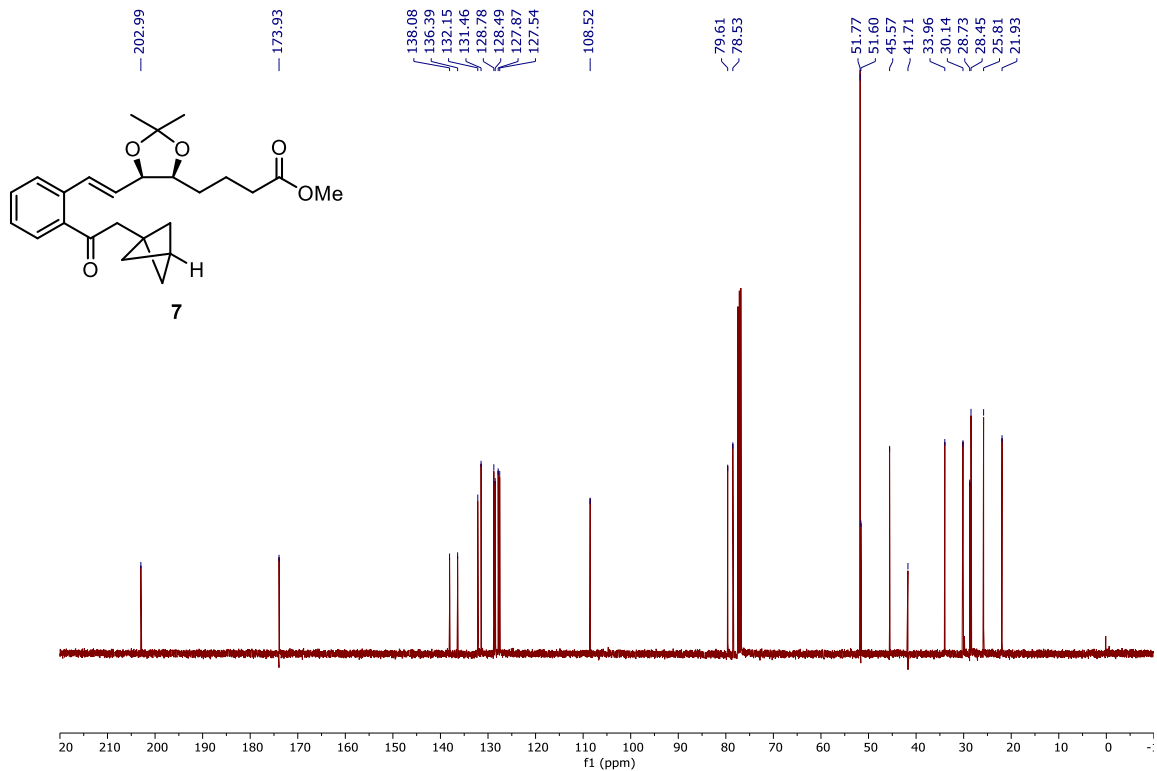

**methyl 4-((4*S*,5*R*)-5-((*E*)-2-((*S*)-2-(bicyclo[1.1.1]pentan-1-yl)-1-hydroxyethyl)styryl)-2,2-dimethyl-1,3-dioxolan-4-yl)butanoate (19a)**

**<sup>1</sup>H-NMR (400 MHz, CDCl<sub>3</sub>):**

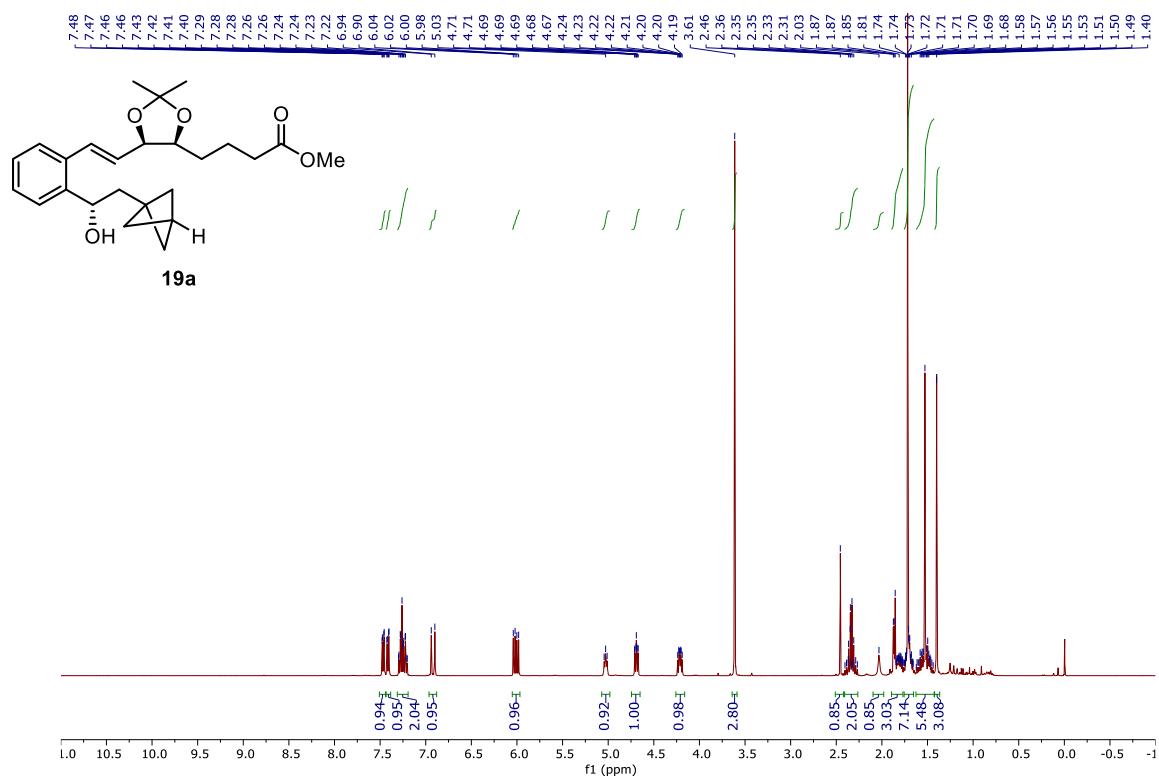

**<sup>13</sup>C-NMR (101 MHz, CDCl<sub>3</sub>):**

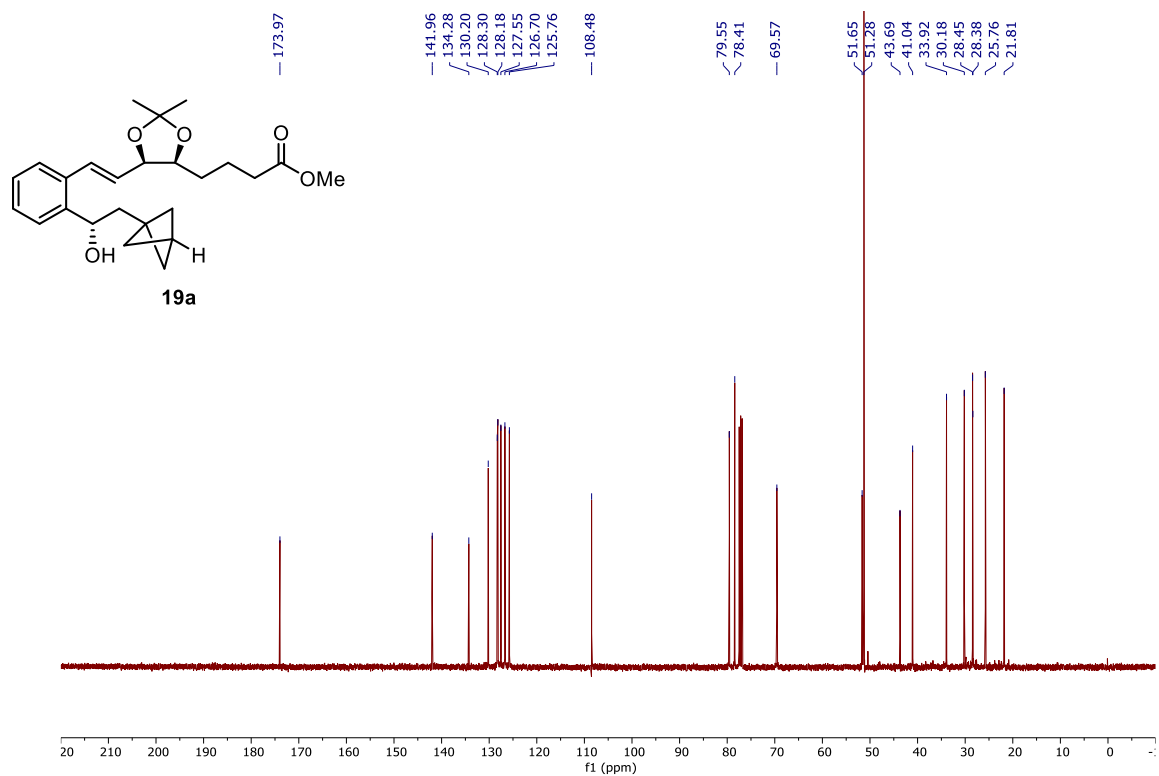

**methyl 4-((4*S*,5*R*)-5-(*R*)-2-(*R*)-2-(bicyclo[1.1.1]pentan-1-yl)-1-hydroxyethyl)styryl)-2,2-dimethyl-1,3-dioxolan-4-yl)butanoate (19b)**

<sup>1</sup>H-NMR (400 MHz, CDCl<sub>3</sub>):

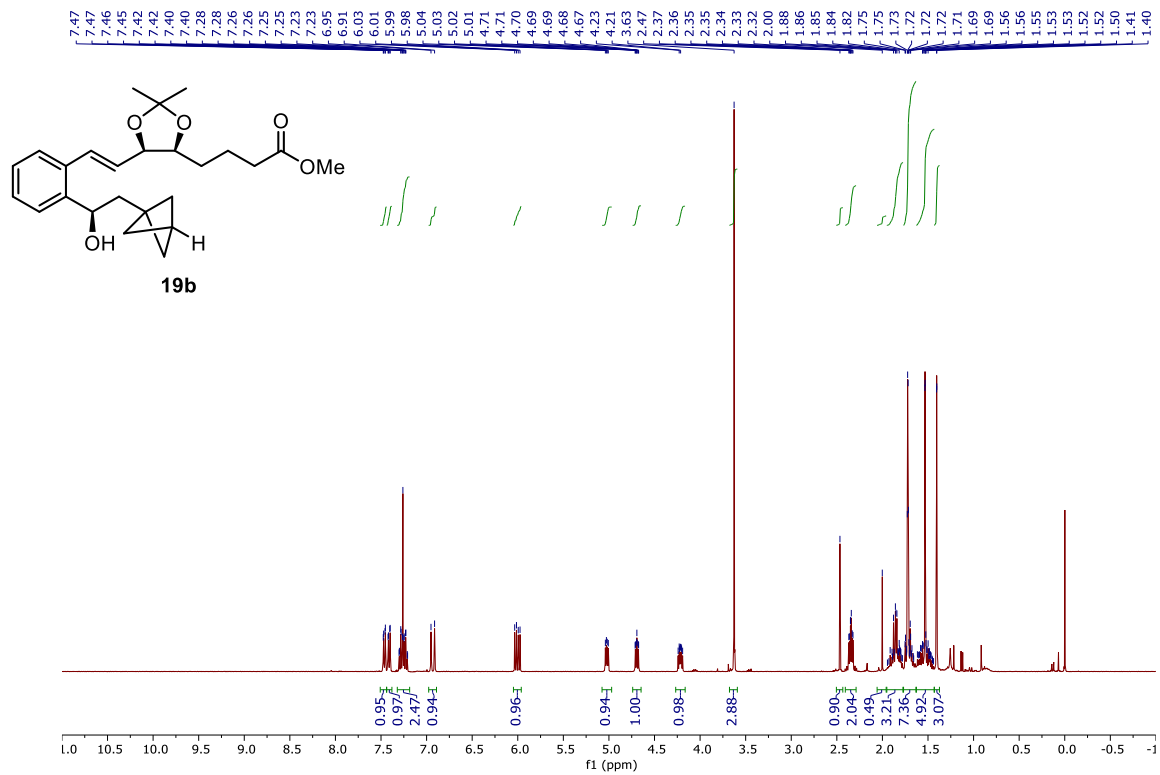

<sup>13</sup>C-NMR (101 MHz, CDCl<sub>3</sub>):

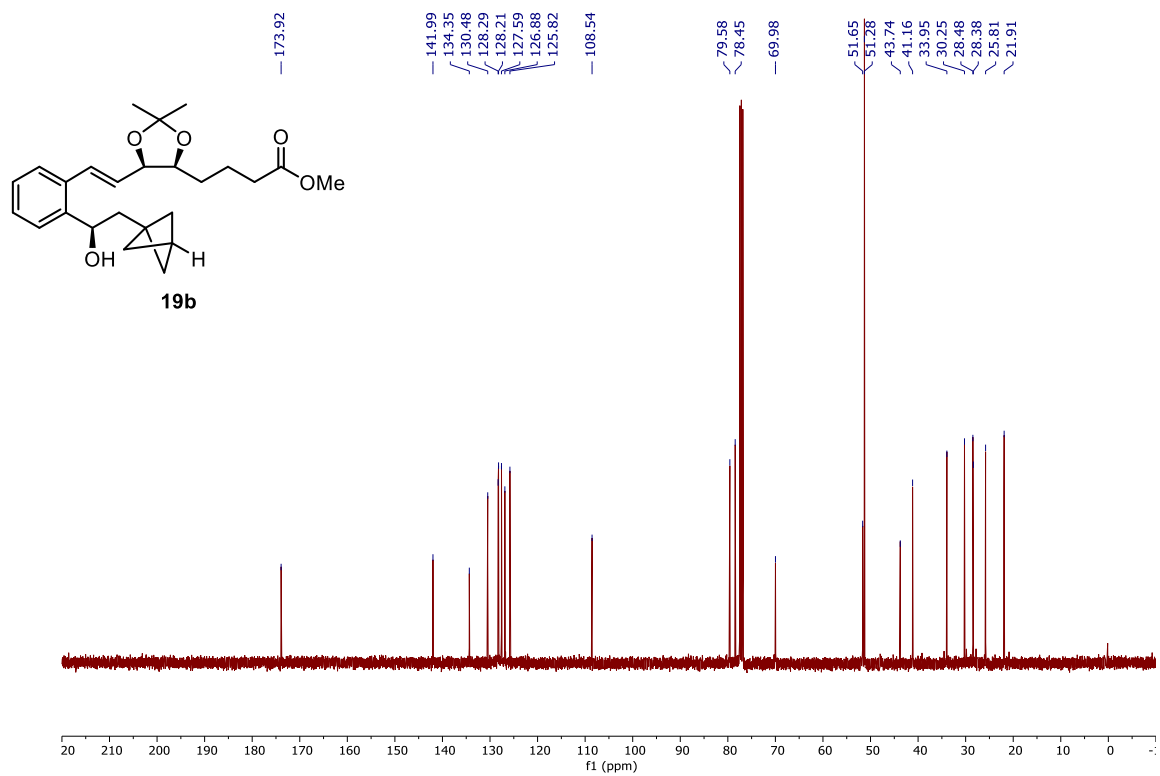

**methyl (5*S*,6*R*,*E*)-8-(2-((*S*)-2-(bicyclo[1.1.1]pentan-1-yl)-1-hydroxyethyl)phenyl)-5,6-dihydroxyoct-7-enoate (5a)**

**<sup>1</sup>H-NMR (500 MHz, CDCl<sub>3</sub>):**

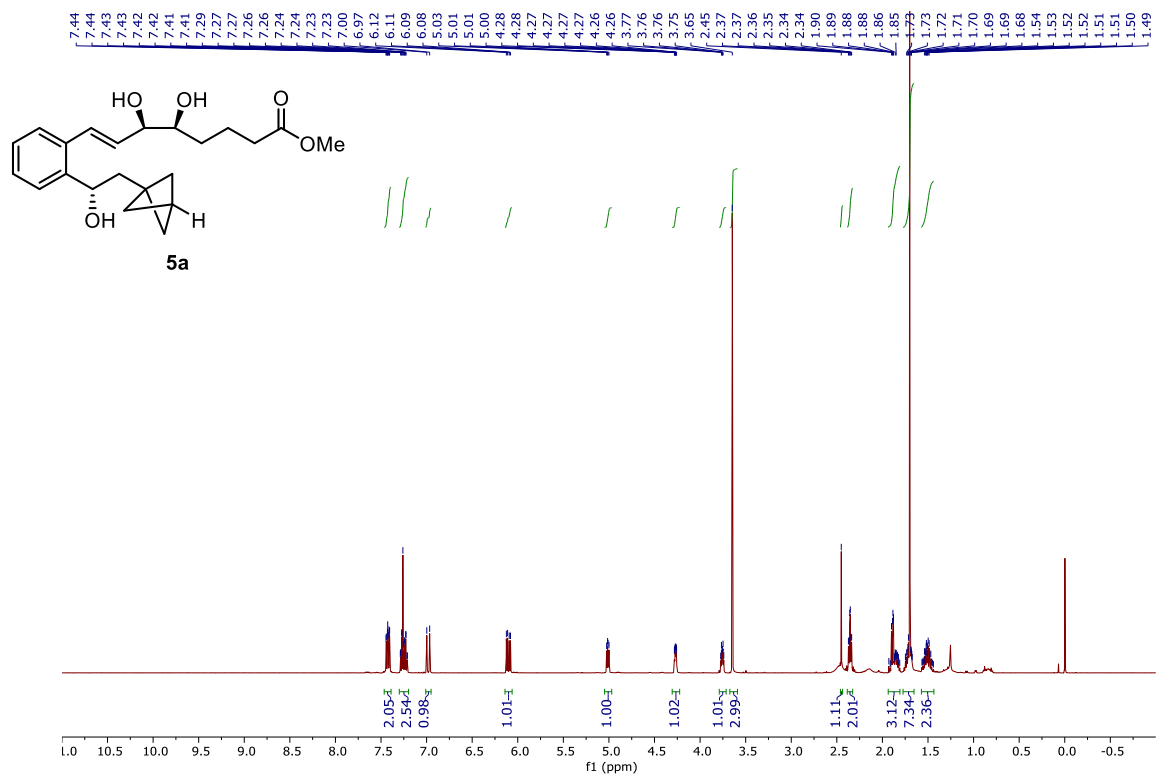

**<sup>13</sup>C-NMR (126 MHz, CDCl<sub>3</sub>):**

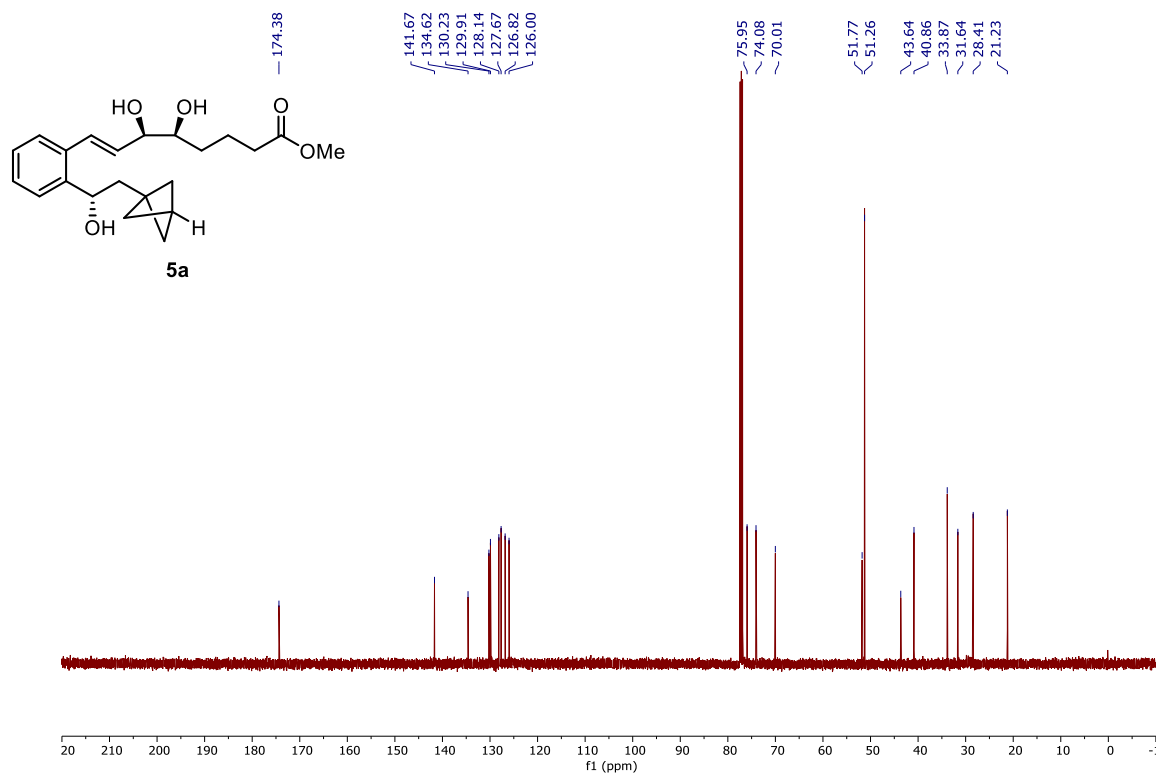

**COSY:**

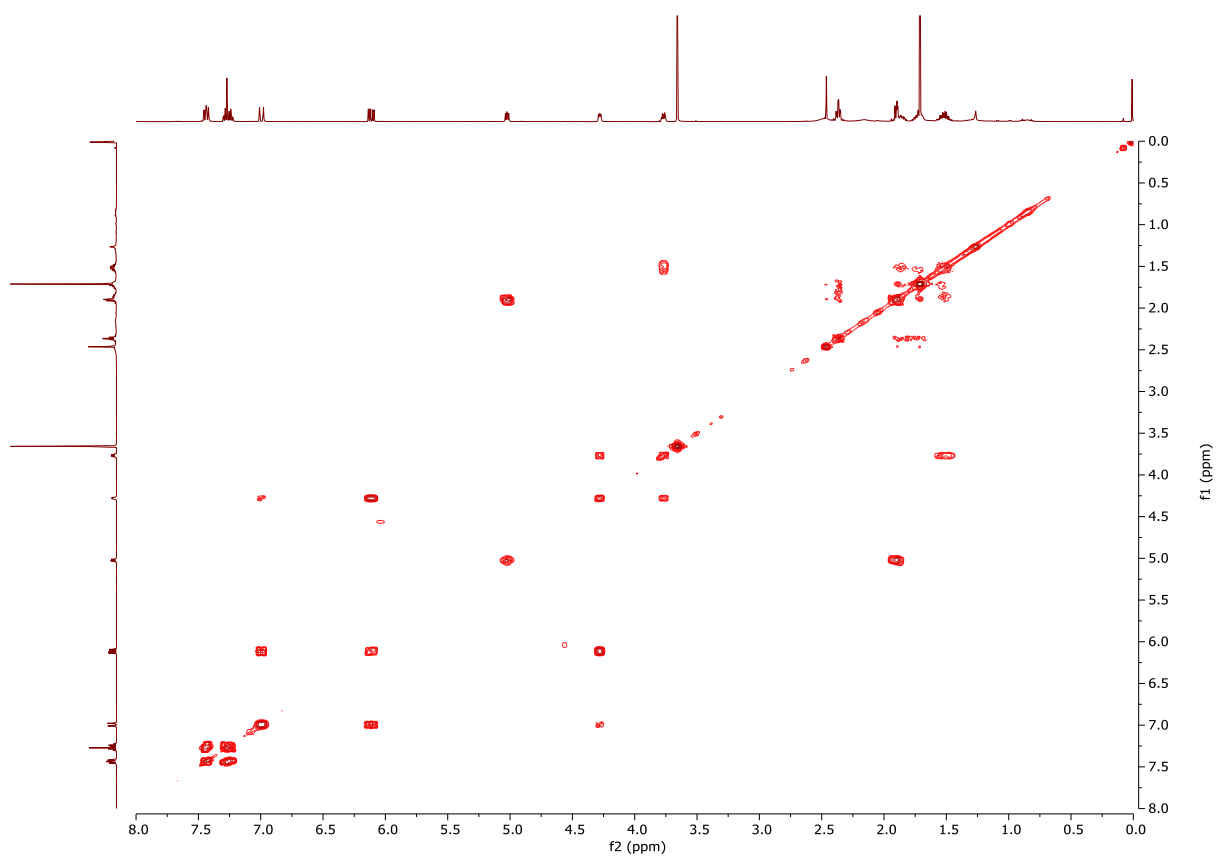

**HSQC:**

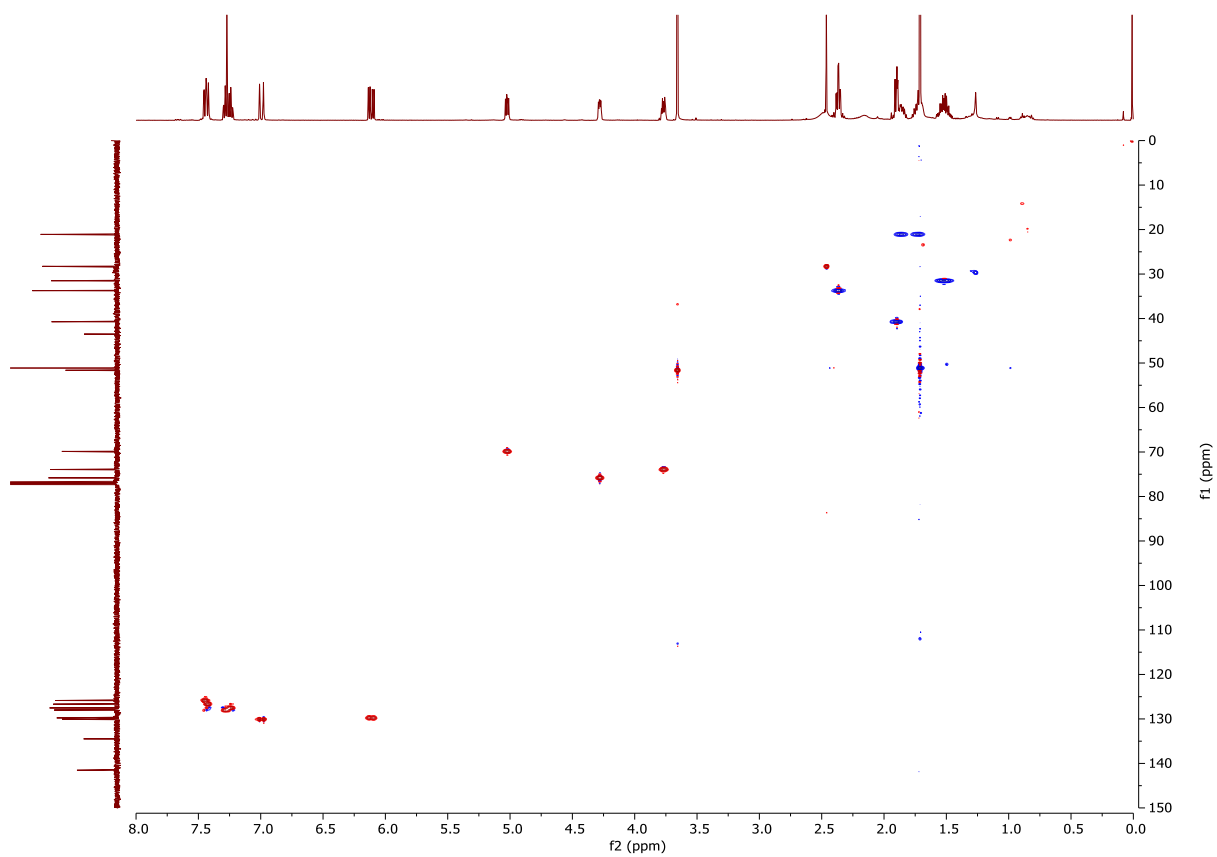





**COSY:**

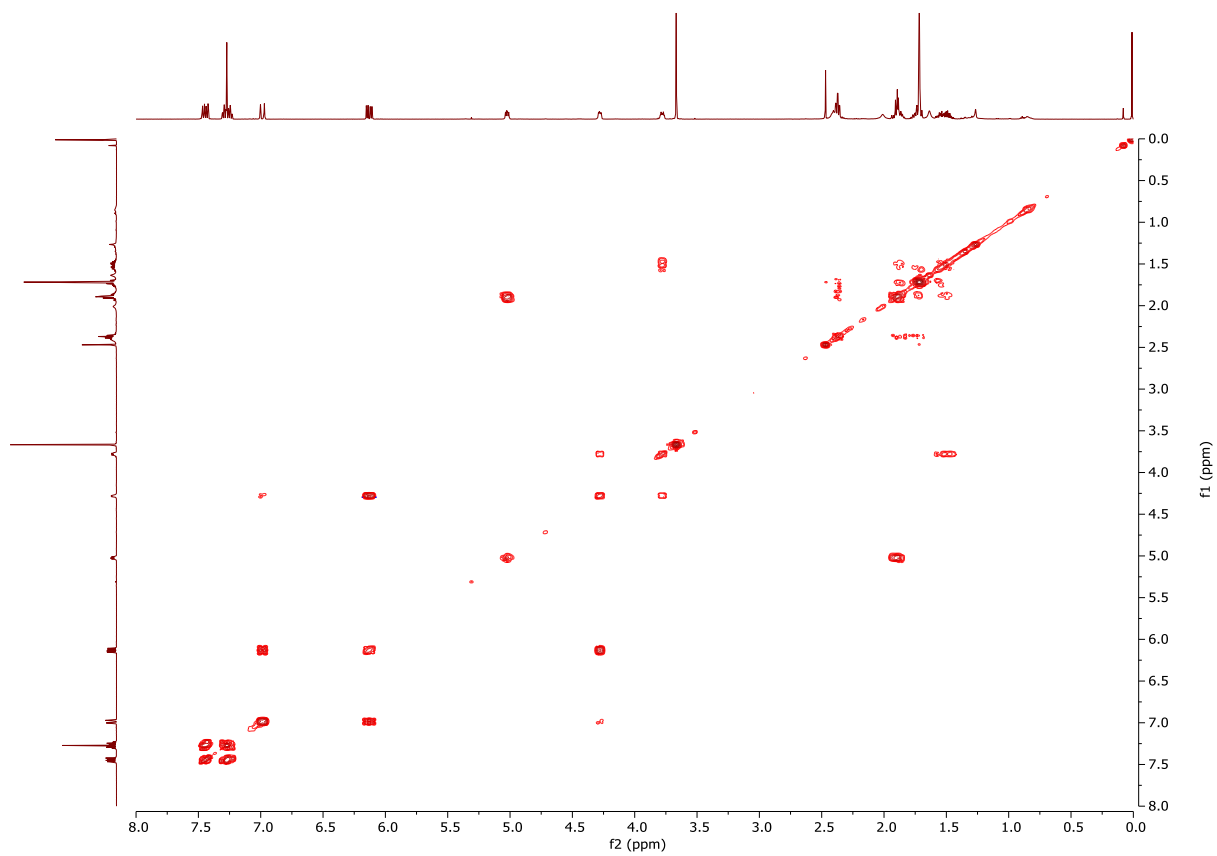

**HSQC:**

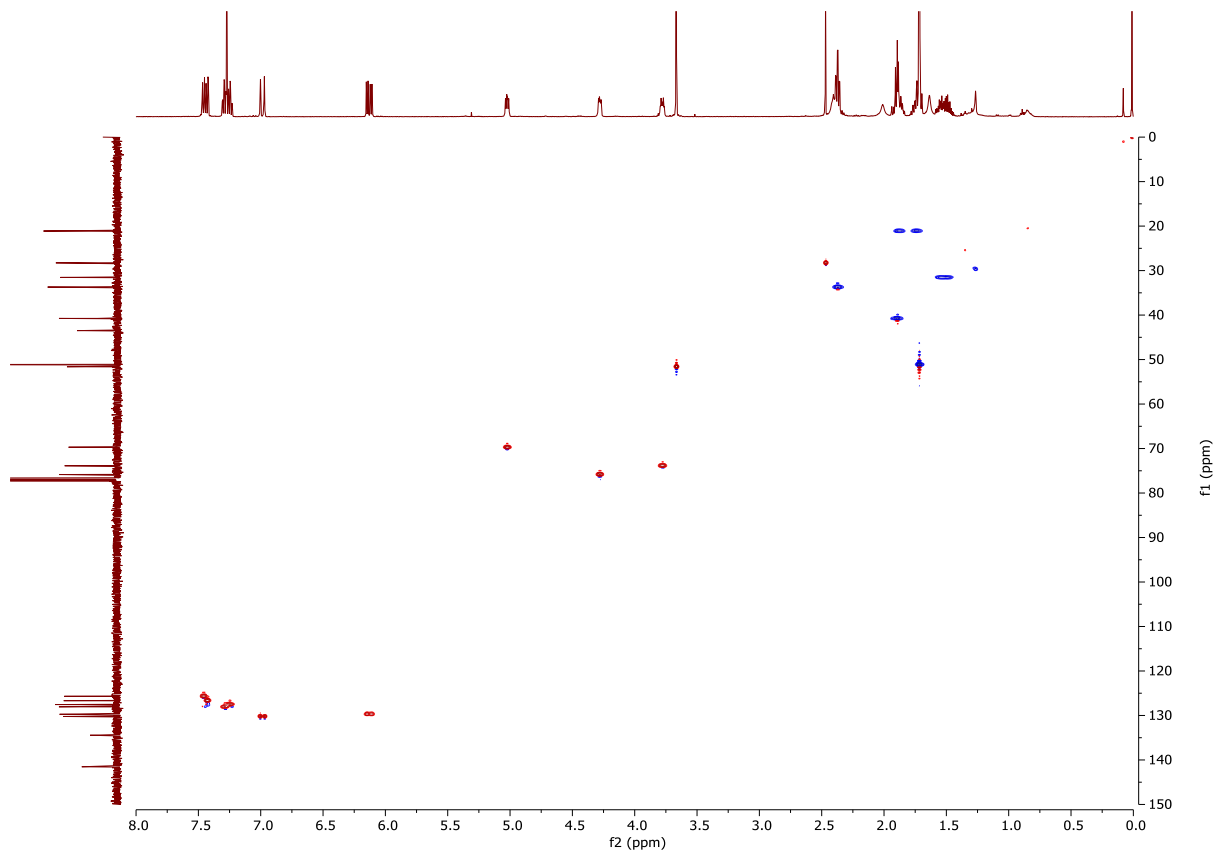

### 4,5-dibromo-1,2-dimethyl-1H-imidazole (21)

$^1\text{H-NMR}$  (400 MHz,  $\text{CDCl}_3$ ):

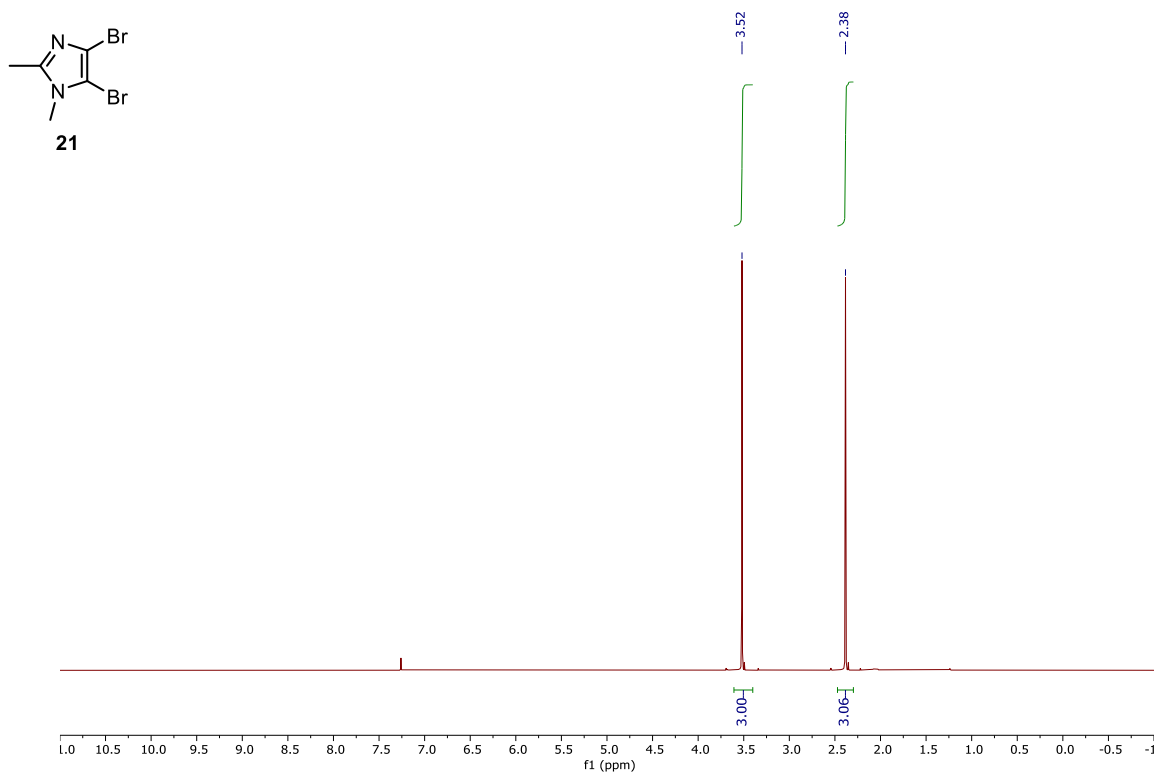

$^{13}\text{C-NMR}$  (101 MHz,  $\text{CDCl}_3$ ):

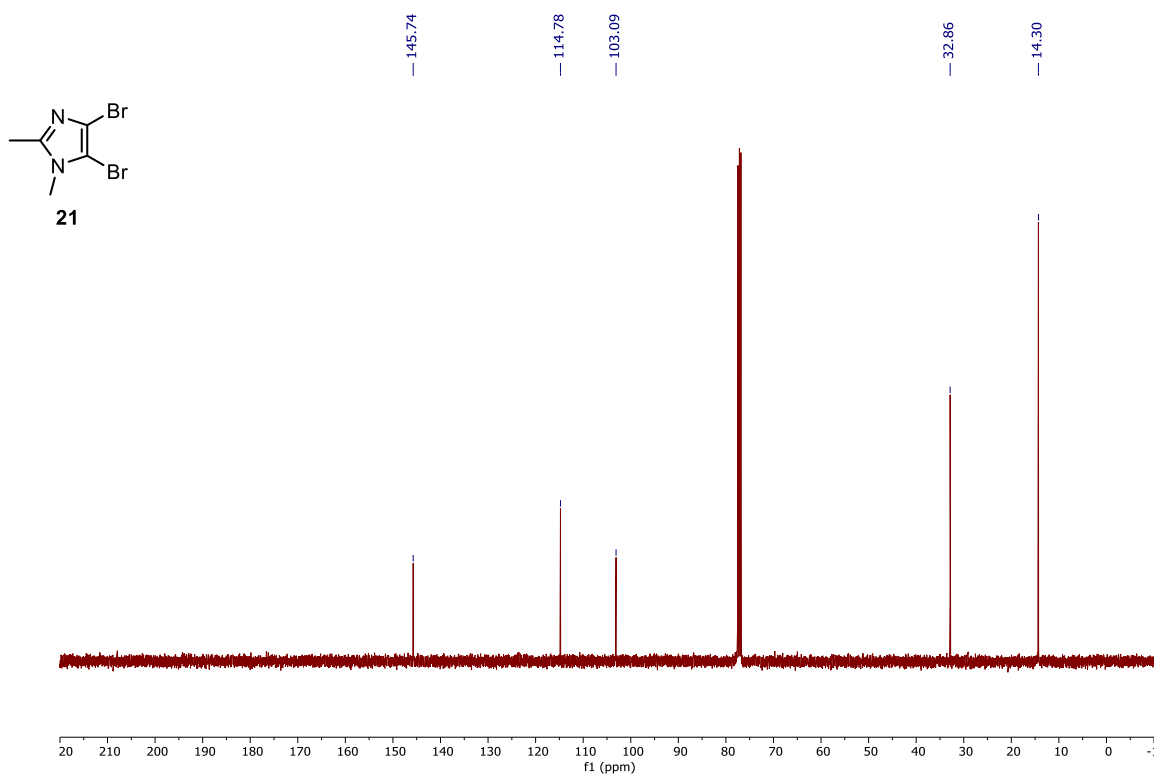

# 1-(1,2,4-trimethyl-1H-imidazol-5-yl)ethan-1-one (22)

$^1\text{H-NMR}$  (400 MHz,  $\text{CDCl}_3$ ):

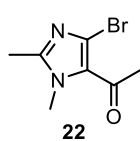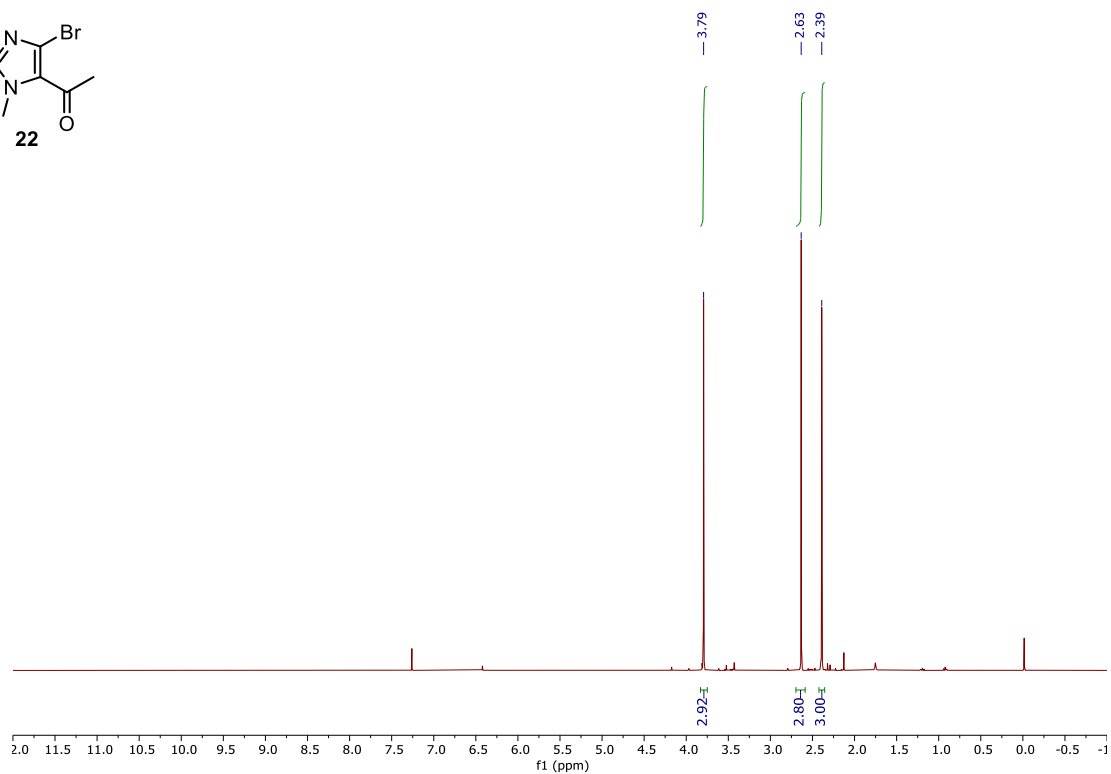

$^{13}\text{C-NMR}$  (101 MHz,  $\text{CDCl}_3$ ):

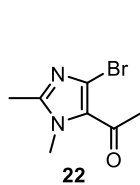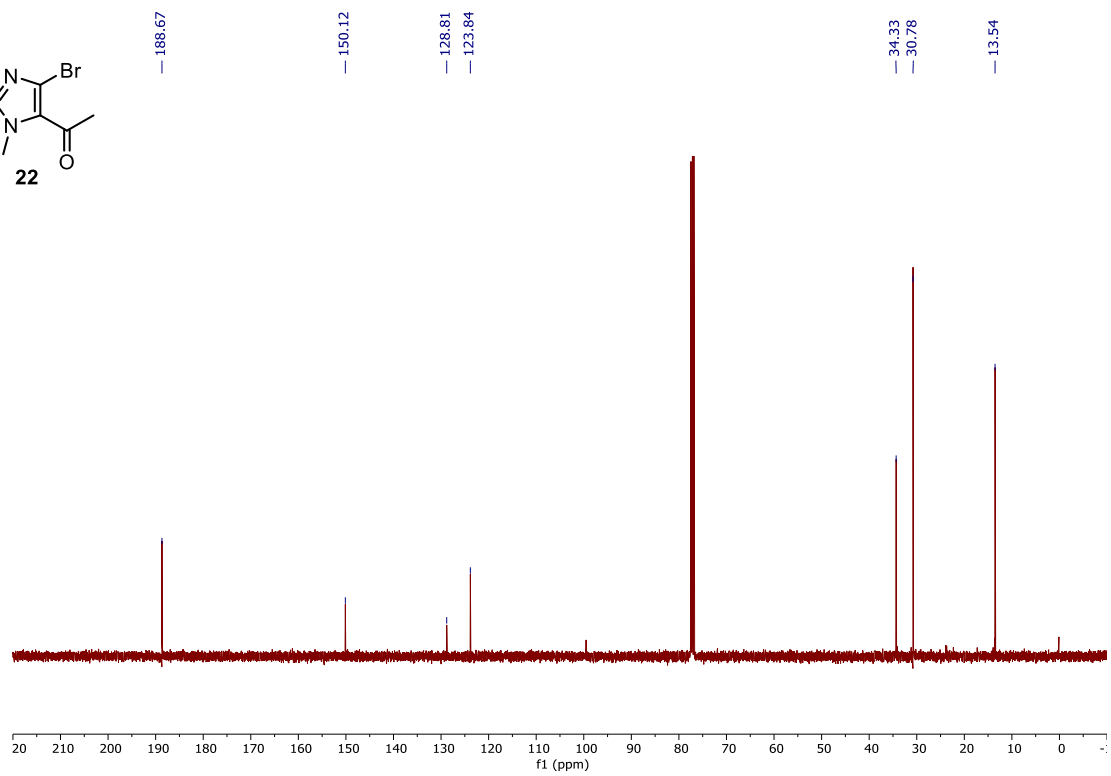

### 1-(4-bromo-1,2-dimethyl-1H-imidazol-5-yl)-2-iodoethan-1-one (15)

<sup>1</sup>H-NMR (400 MHz, CDCl<sub>3</sub>):

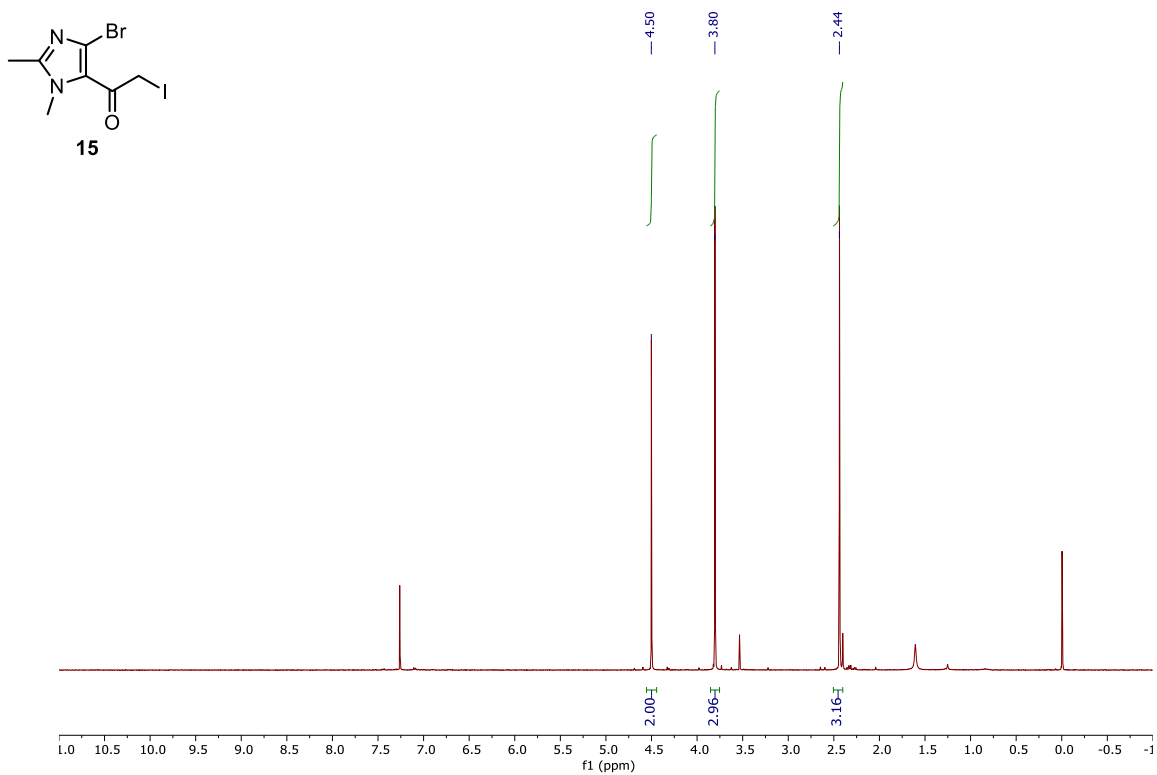

<sup>13</sup>C-NMR (101 MHz, CDCl<sub>3</sub>):

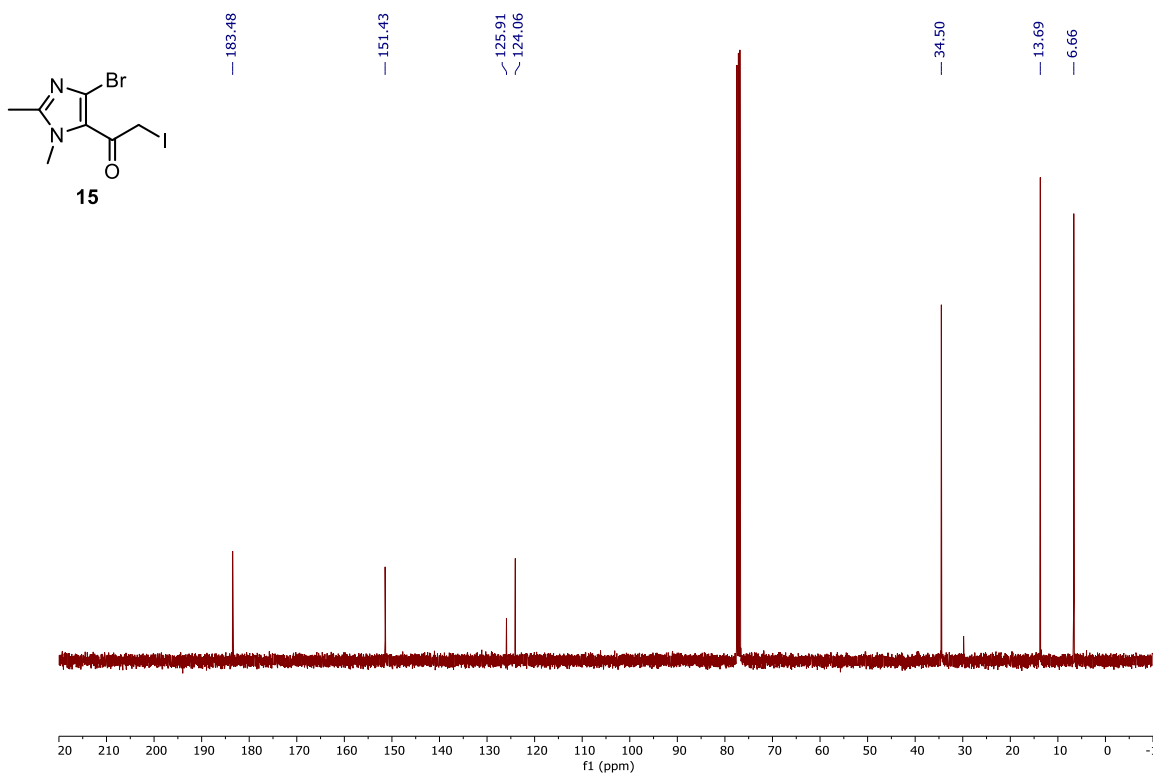

## 2-(bicyclo[1.1.1]pentan-1-yl)-1-(4-bromo-1,2-dimethyl-1H-imidazol-5-yl)ethan-1-one (24)

$^1\text{H-NMR}$  (400 MHz,  $\text{CDCl}_3$ ):

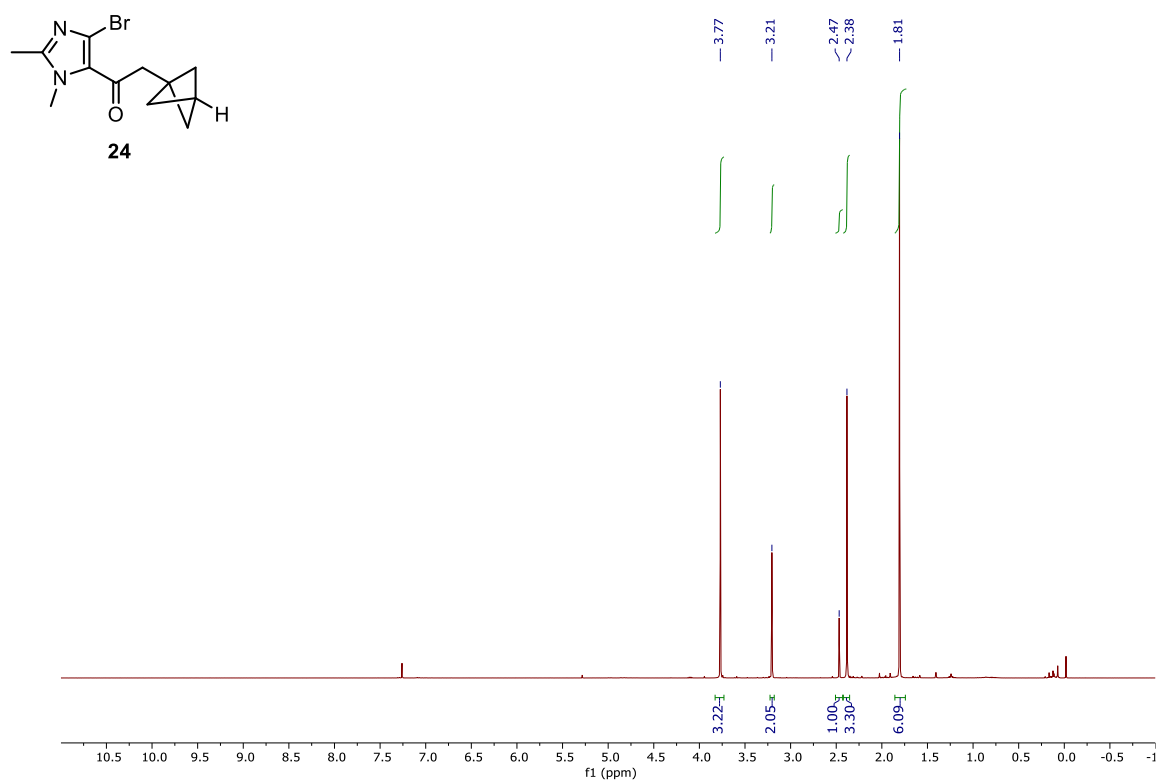

$^{13}\text{C-NMR}$  (101 MHz,  $\text{CDCl}_3$ ):

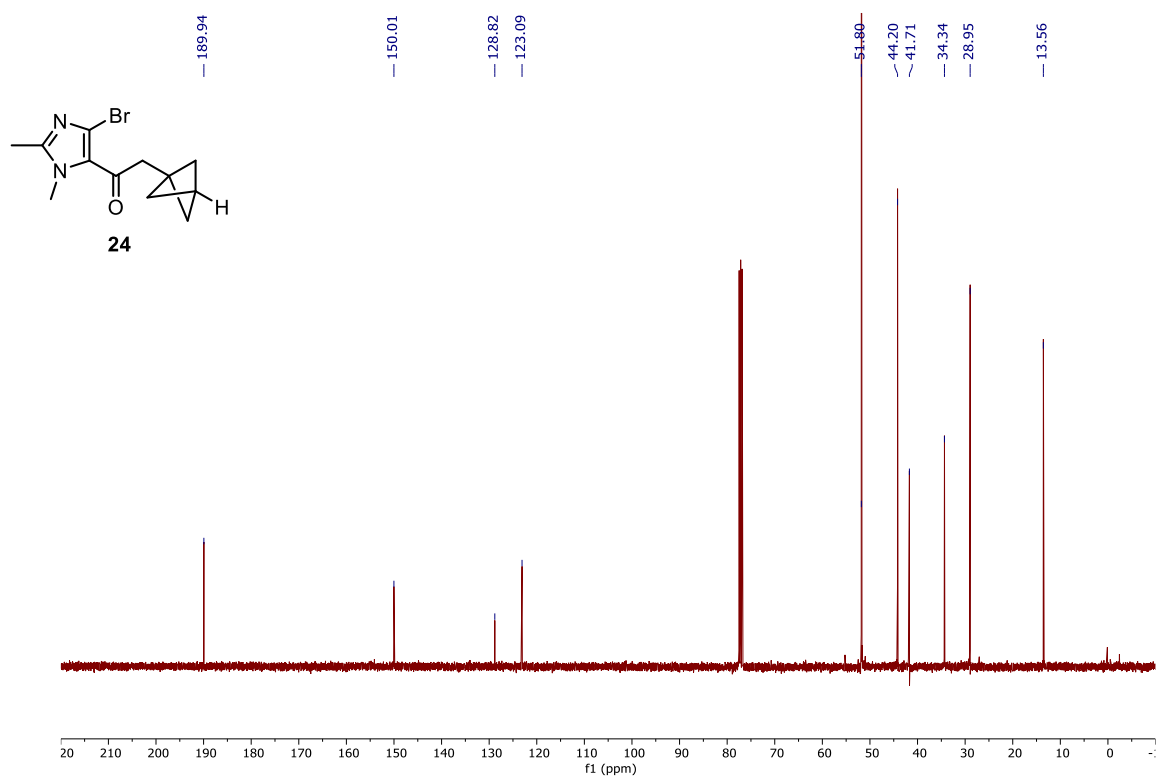

**(S)-2-(bicyclo[1.1.1]pentan-1-yl)-1-(4-bromo-1,2-dimethyl-1H-imidazol-5-yl)ethan-1-ol ((S)-11)**

**<sup>1</sup>H-NMR (500 MHz, CDCl<sub>3</sub>):**

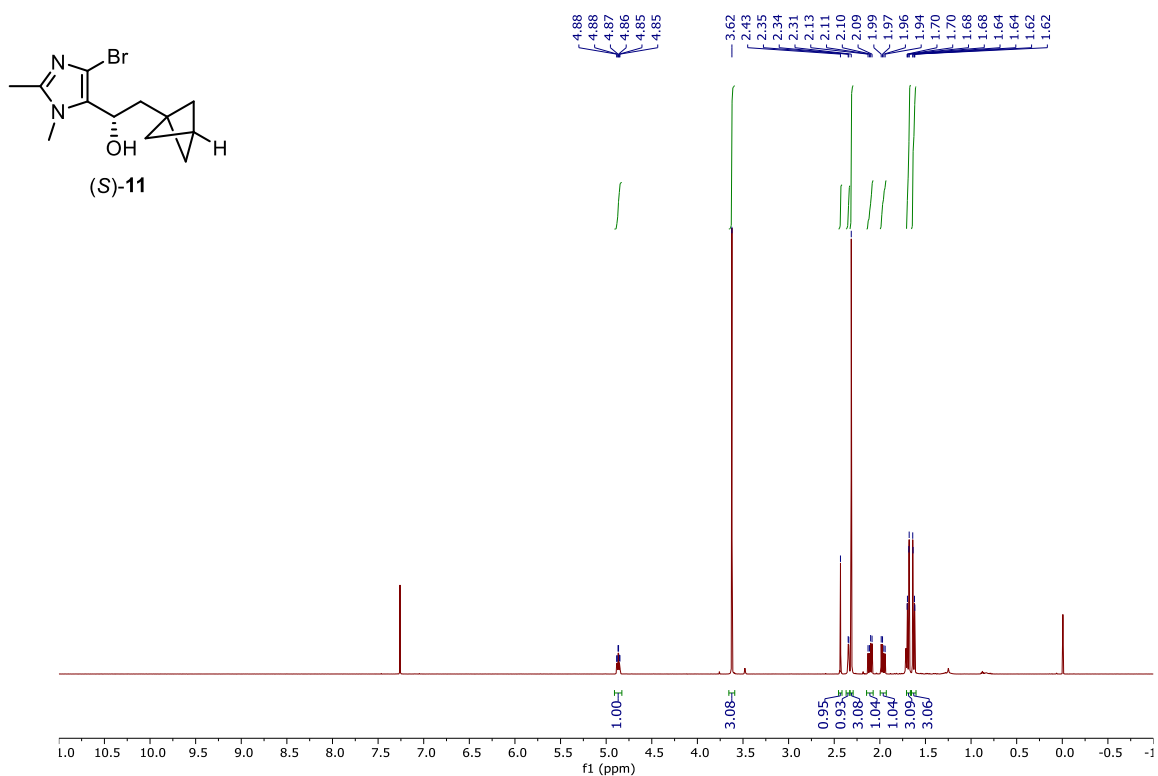

**<sup>13</sup>C-NMR (101 MHz, CDCl<sub>3</sub>):**

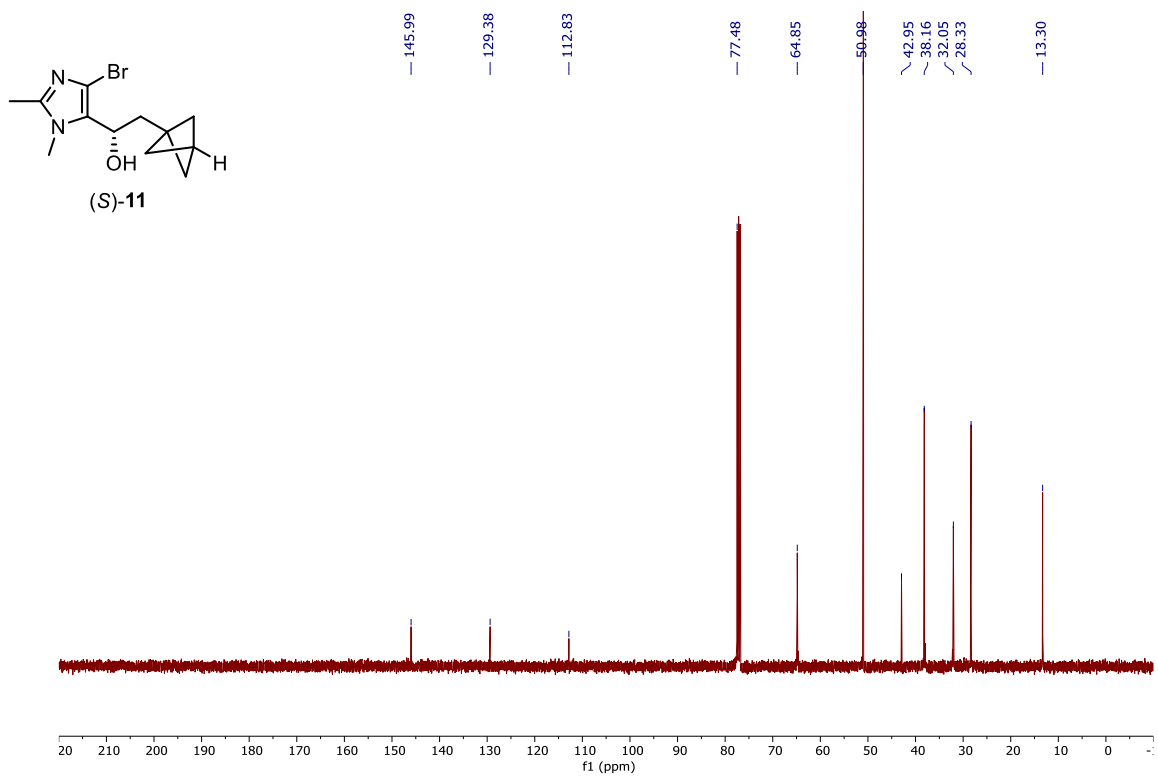

**(R)-2-(bicyclo[1.1.1]pentan-1-yl)-1-(4-bromo-1,2-dimethyl-1H-imidazol-5-yl)ethan-1-ol ((R)-11)**

**<sup>1</sup>H-NMR (500 MHz, CDCl<sub>3</sub>):**

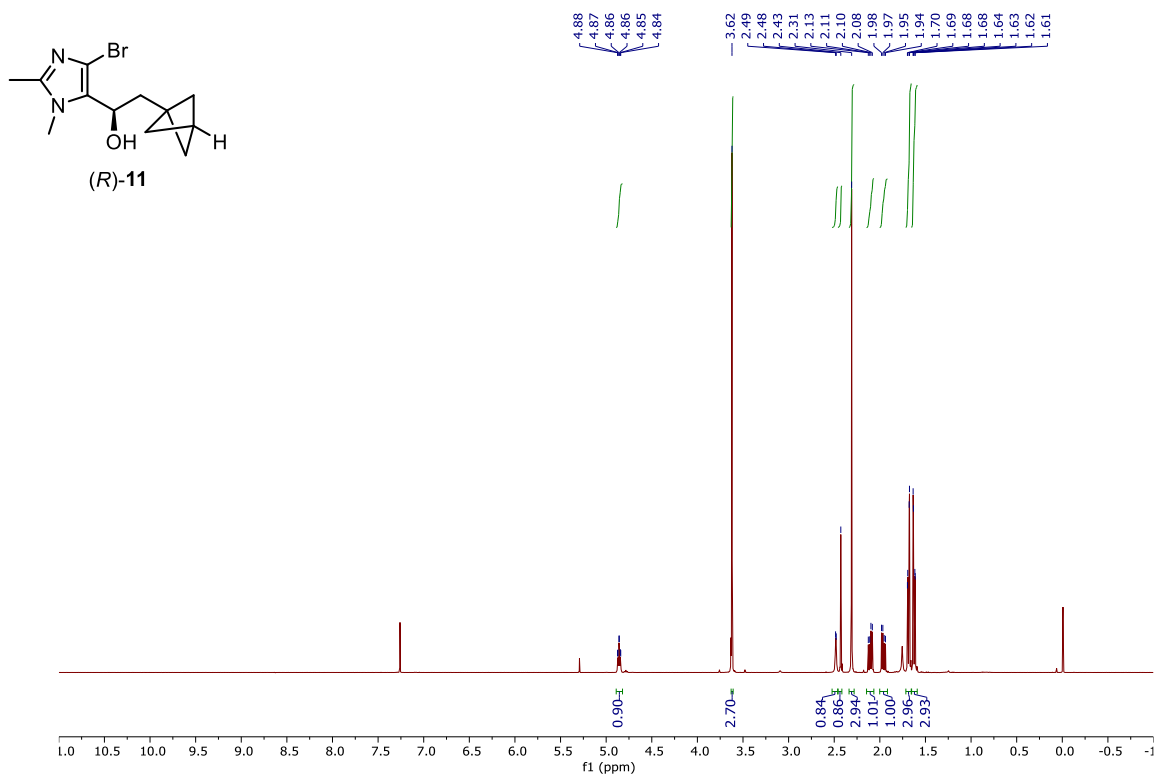

**<sup>13</sup>C-NMR (126 MHz, CDCl<sub>3</sub>):**

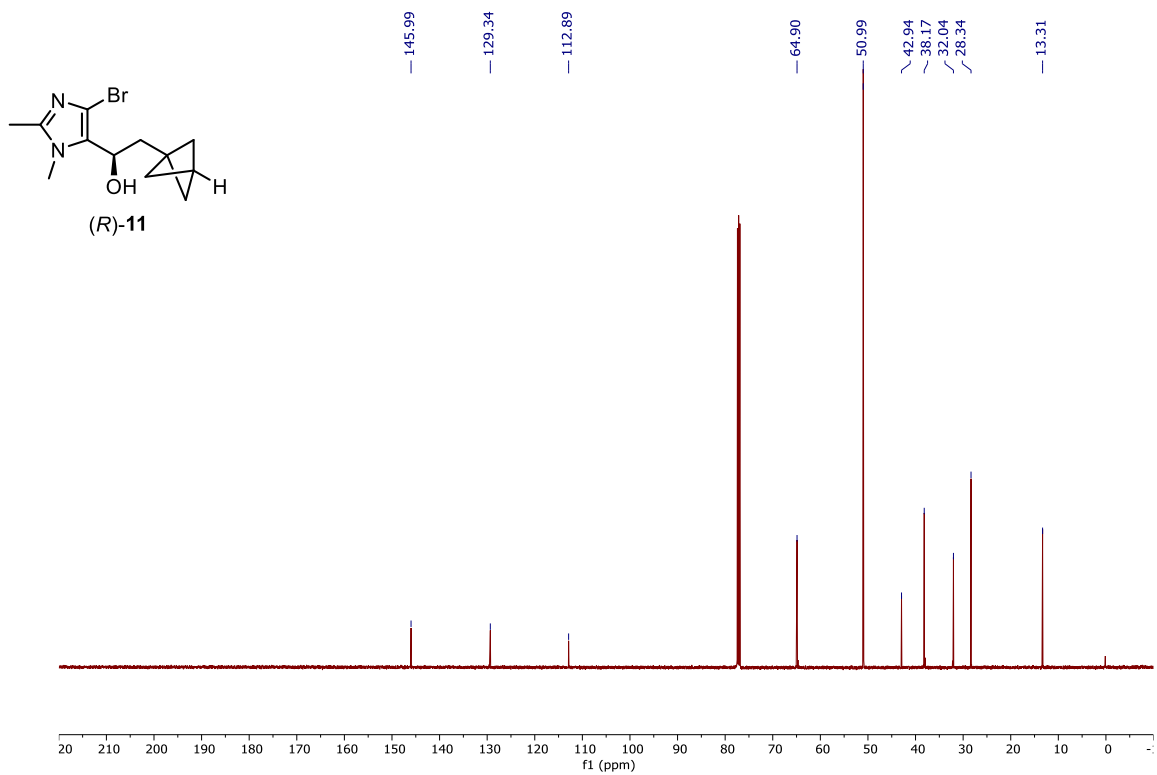



**methyl 4-((4*S*,5*R*)-5-((*E*)-2-(5-((*S*)-2-(bicyclo[1.1.1]pentan-1-yl)-1-hydroxyethyl)-1,2-dimethyl-1*H*-imidazol-4-yl)vinyl)-2,2-dimethyl-1,3-dioxolan-4-yl)butanoate (8a)**

<sup>1</sup>H-NMR (400 MHz, CDCl<sub>3</sub>):

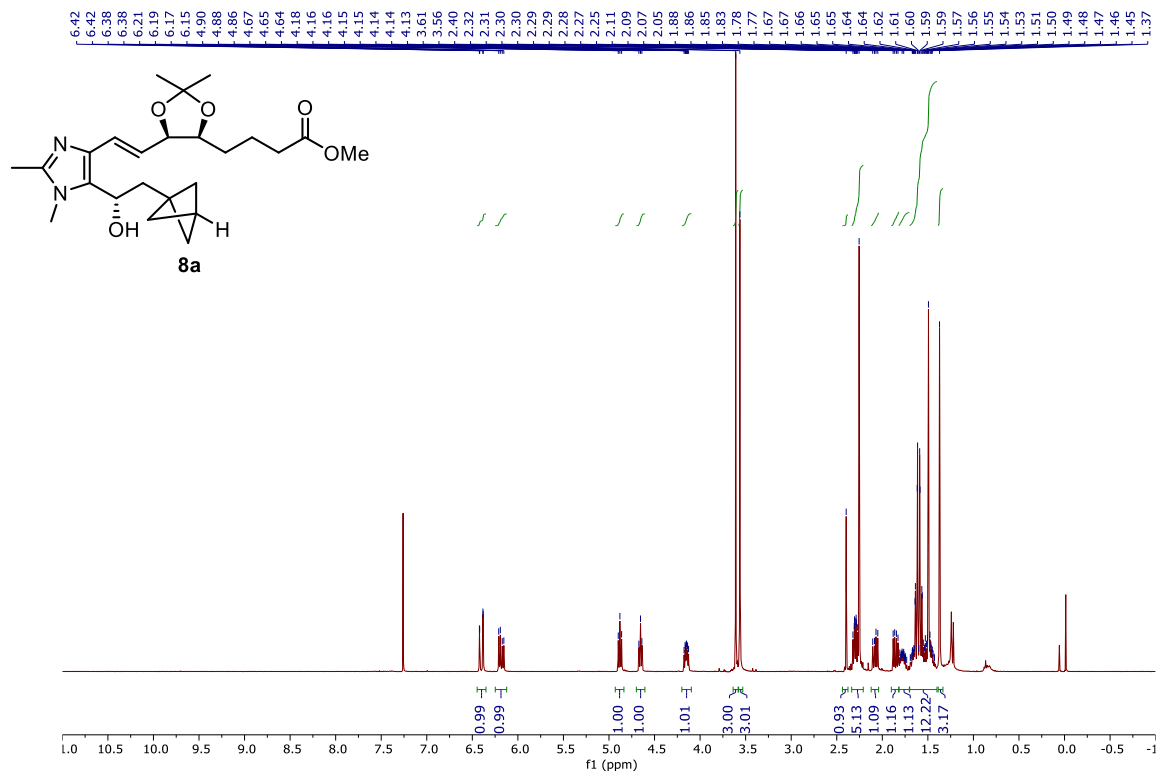

<sup>13</sup>C-NMR (101 MHz, CDCl<sub>3</sub>):

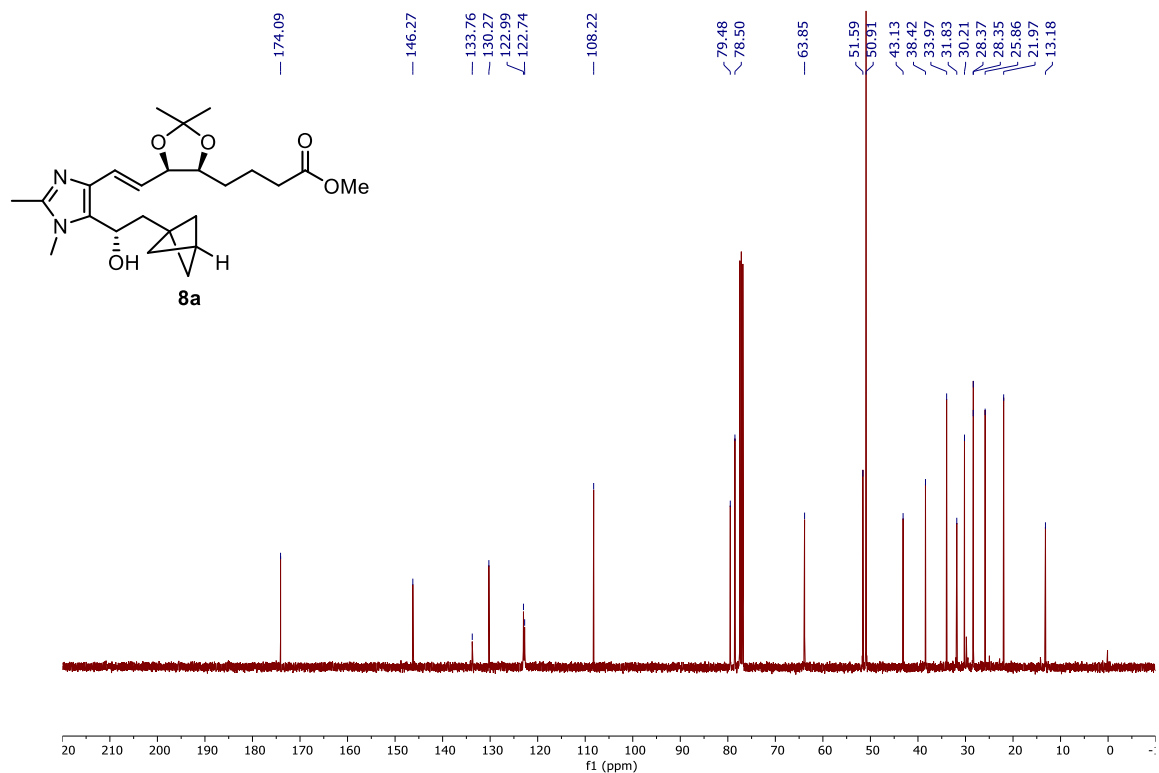

**methyl 4-((4*S*,5*R*)-5-((*E*)-2-(5-((*R*)-2-(bicyclo[1.1.1]pentan-1-yl)-1-hydroxyethyl)-1,2-dimethyl-1*H*-imidazol-4-yl)vinyl)-2,2-dimethyl-1,3-dioxolan-4-yl)butanoate (**8b**)**

<sup>1</sup>H-NMR (400 MHz, CDCl<sub>3</sub>):

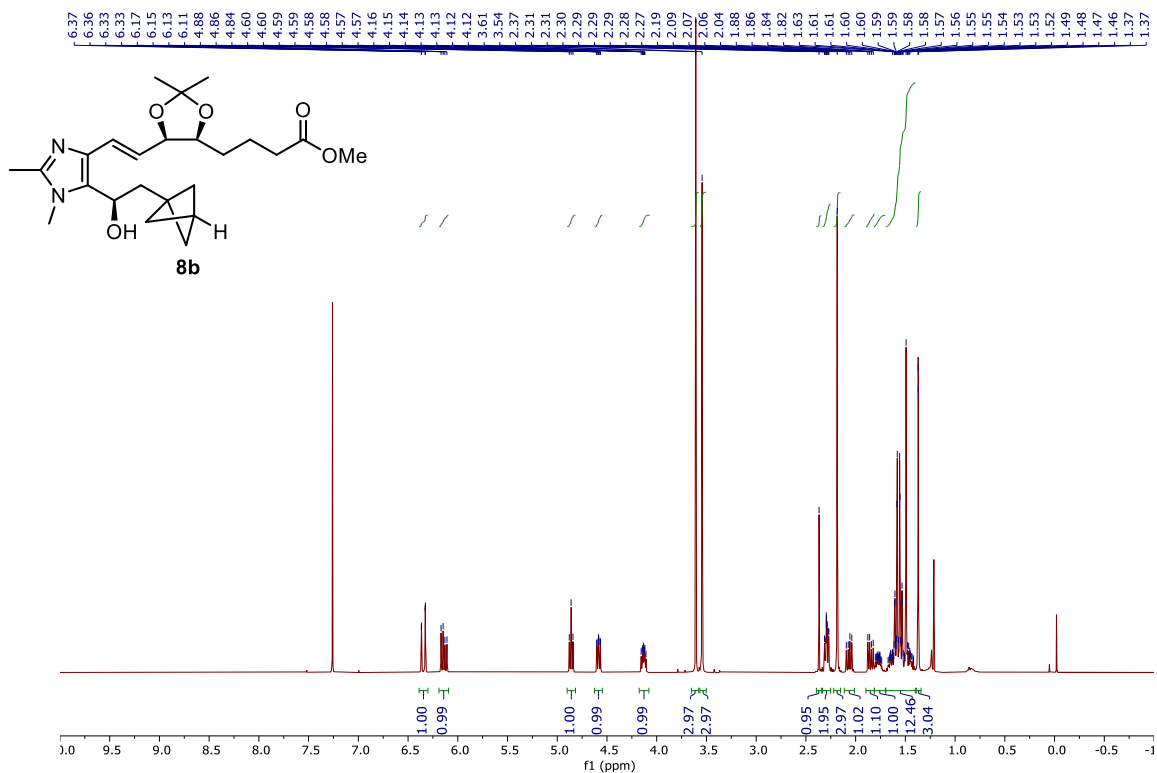

<sup>13</sup>C-NMR (101 MHz, CDCl<sub>3</sub>):

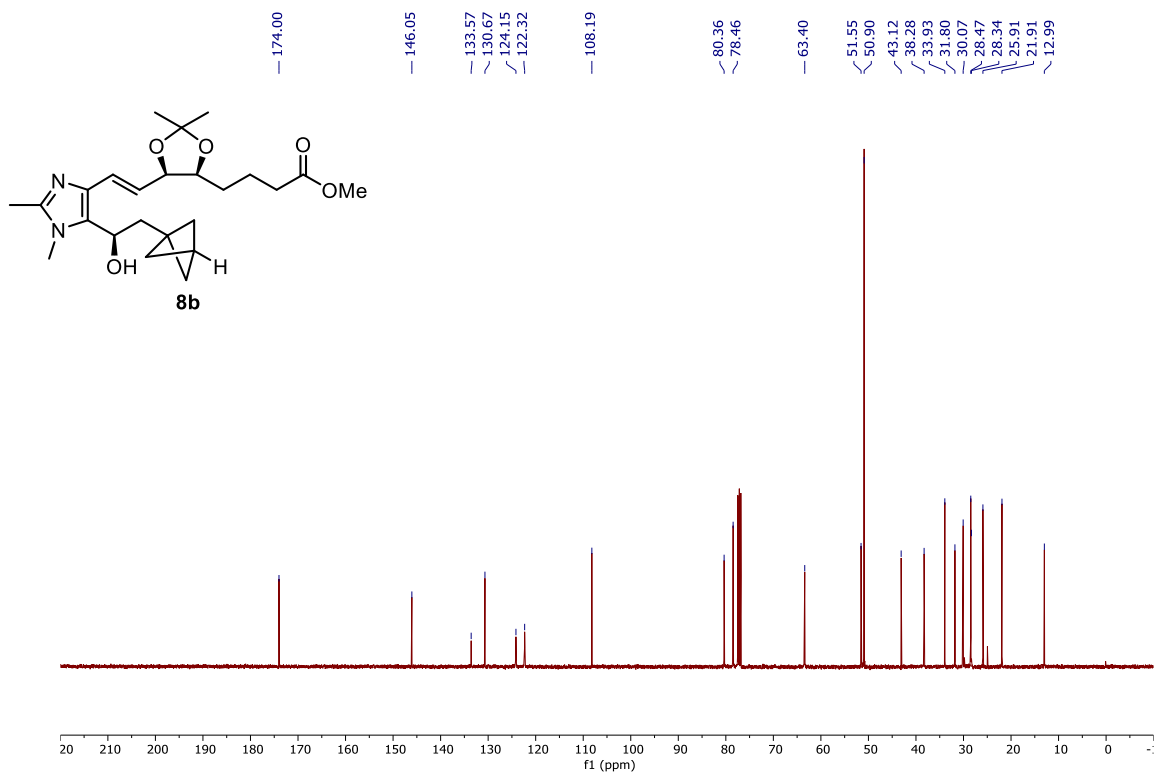

**methyl (5*S*,6*R*,*E*)-8-(5-((*S*)-2-(bicyclo[1.1.1]pentan-1-yl)-1-hydroxyethyl)-1,2-dimethyl-1*H*-imidazol-4-yl)-5,6-dihydroxyoct-7-enoate (6a)**

**<sup>1</sup>H-NMR (500 MHz, CDCl<sub>3</sub>):**

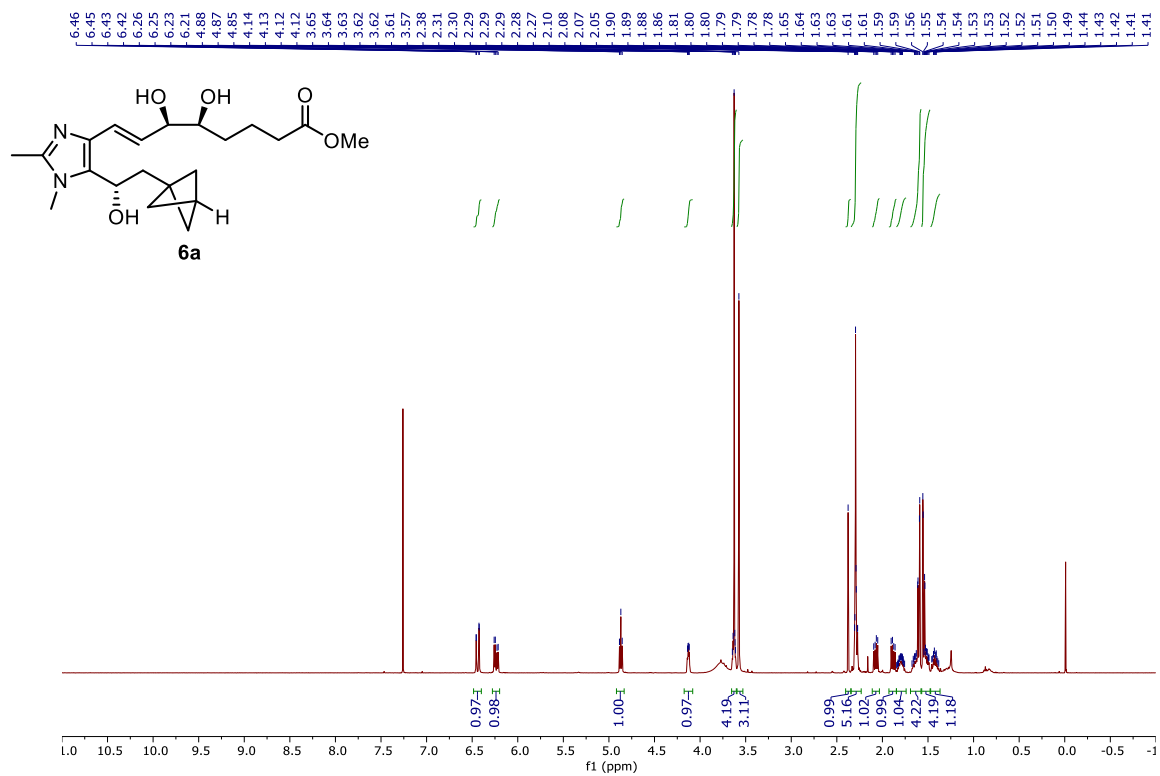

**<sup>13</sup>C-NMR (126 MHz, CDCl<sub>3</sub>):**

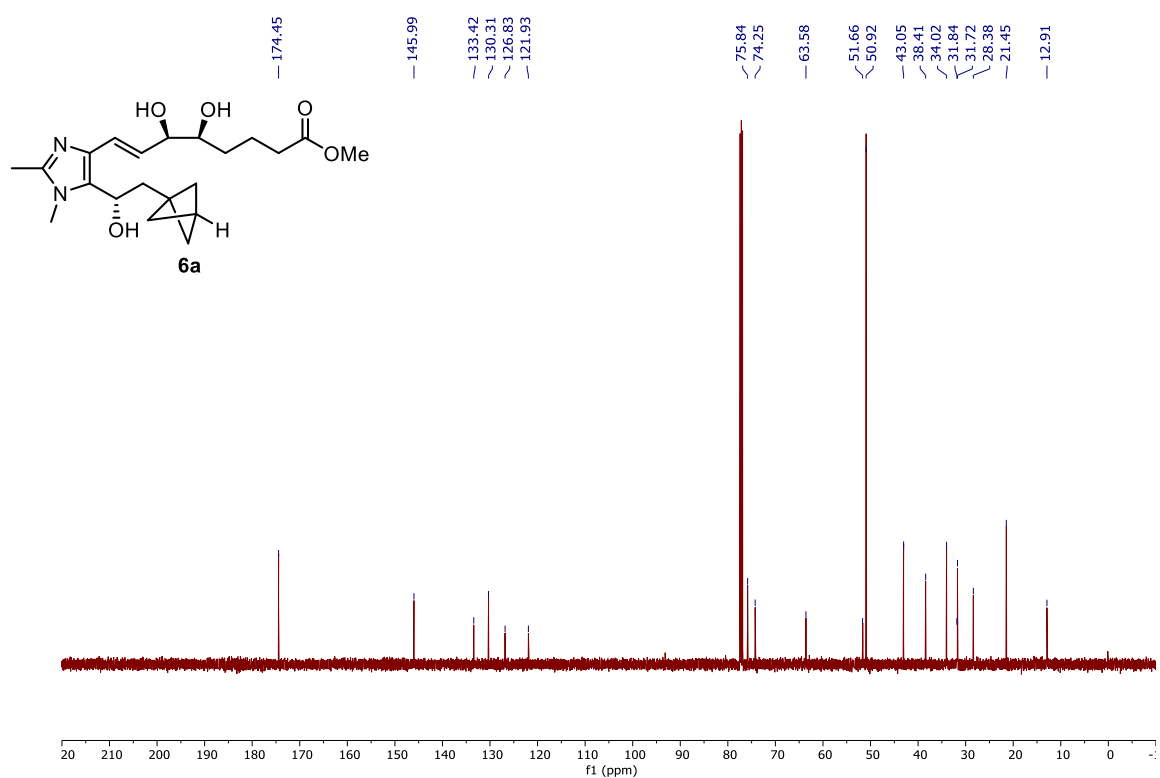

**COSY:**

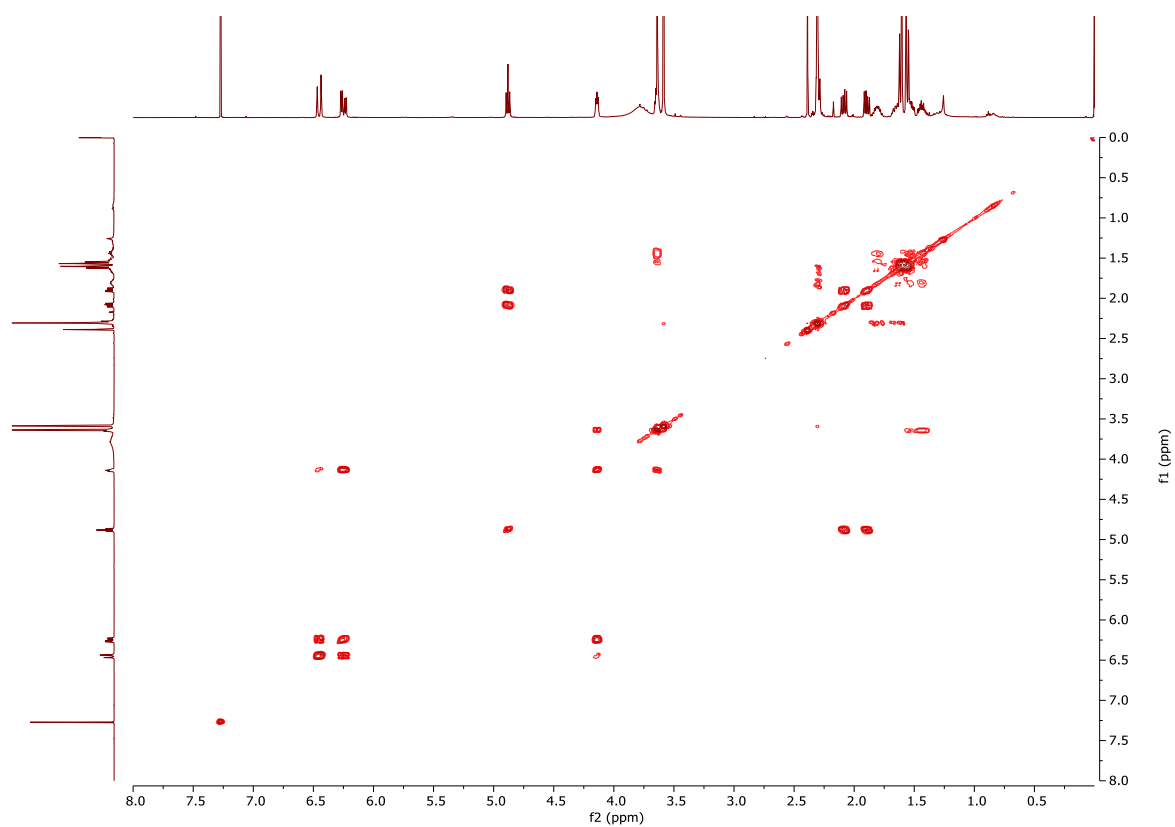

**HSQC:**

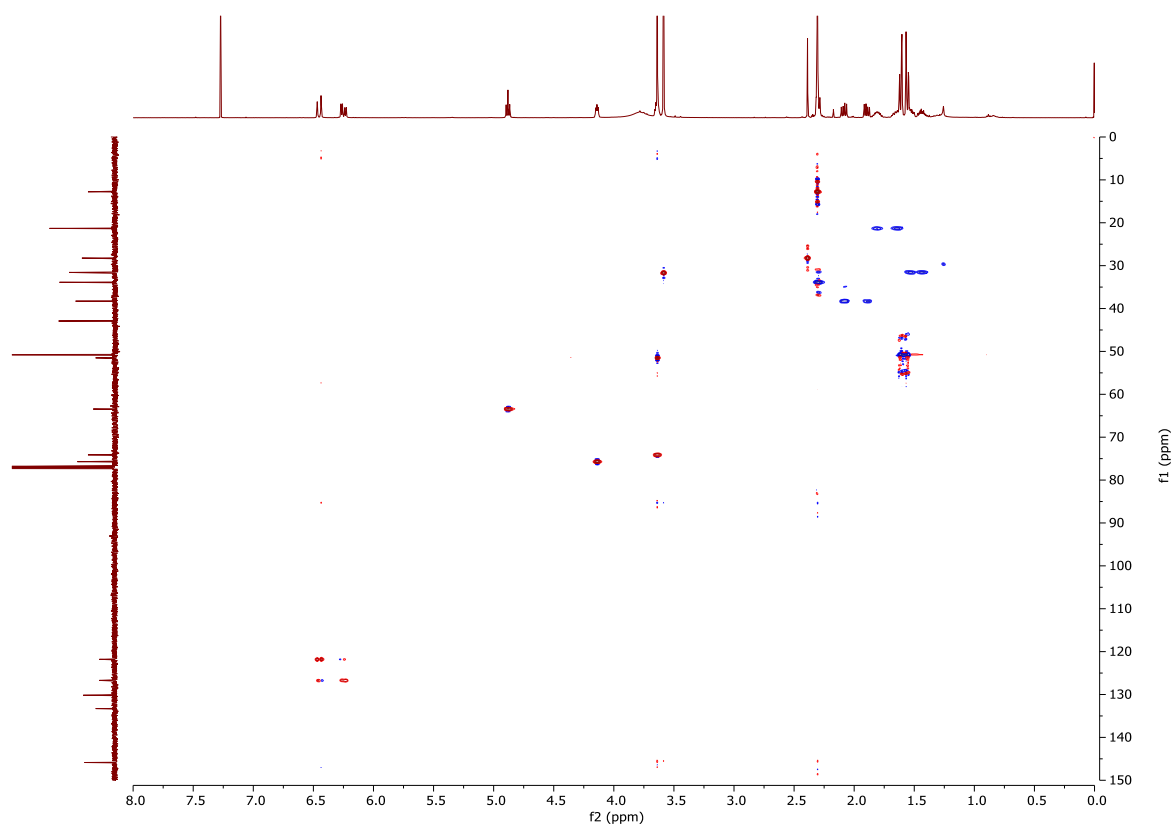

**methyl (5*S*,6*R*,*E*)-8-(5-((*R*)-2-(bicyclo[1.1.1]pentan-1-yl)-1-hydroxyethyl)-1,2-dimethyl-1*H*-imidazol-4-yl)-5,6-dihydroxyoct-7-enoate (6b)**

**<sup>1</sup>H-NMR (500 MHz, CDCl<sub>3</sub>):**

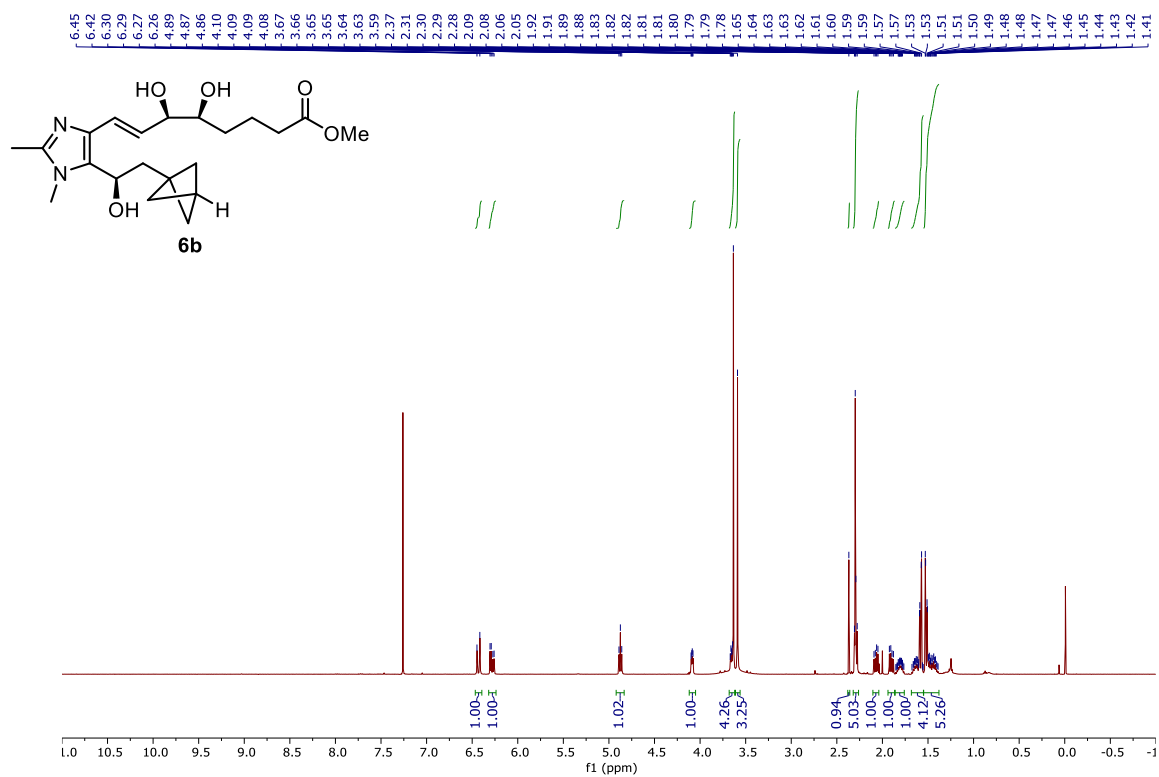

**<sup>13</sup>C-NMR (126 MHz, CDCl<sub>3</sub>):**

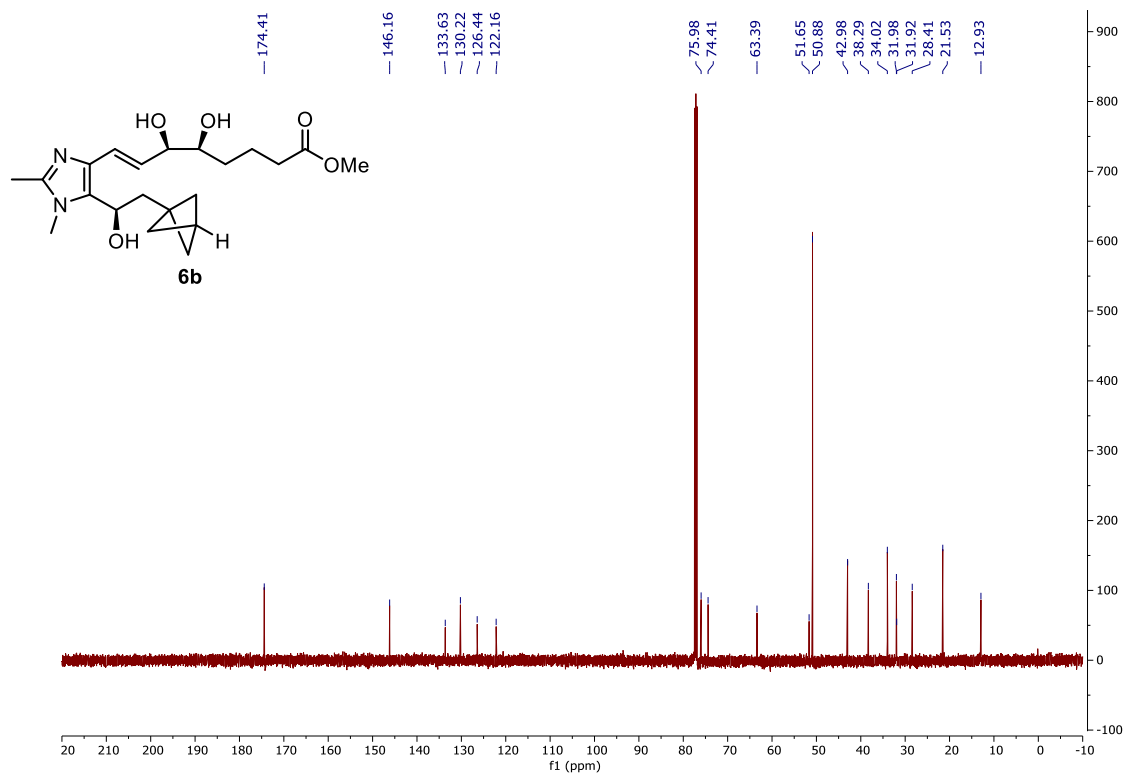

**COSY:**

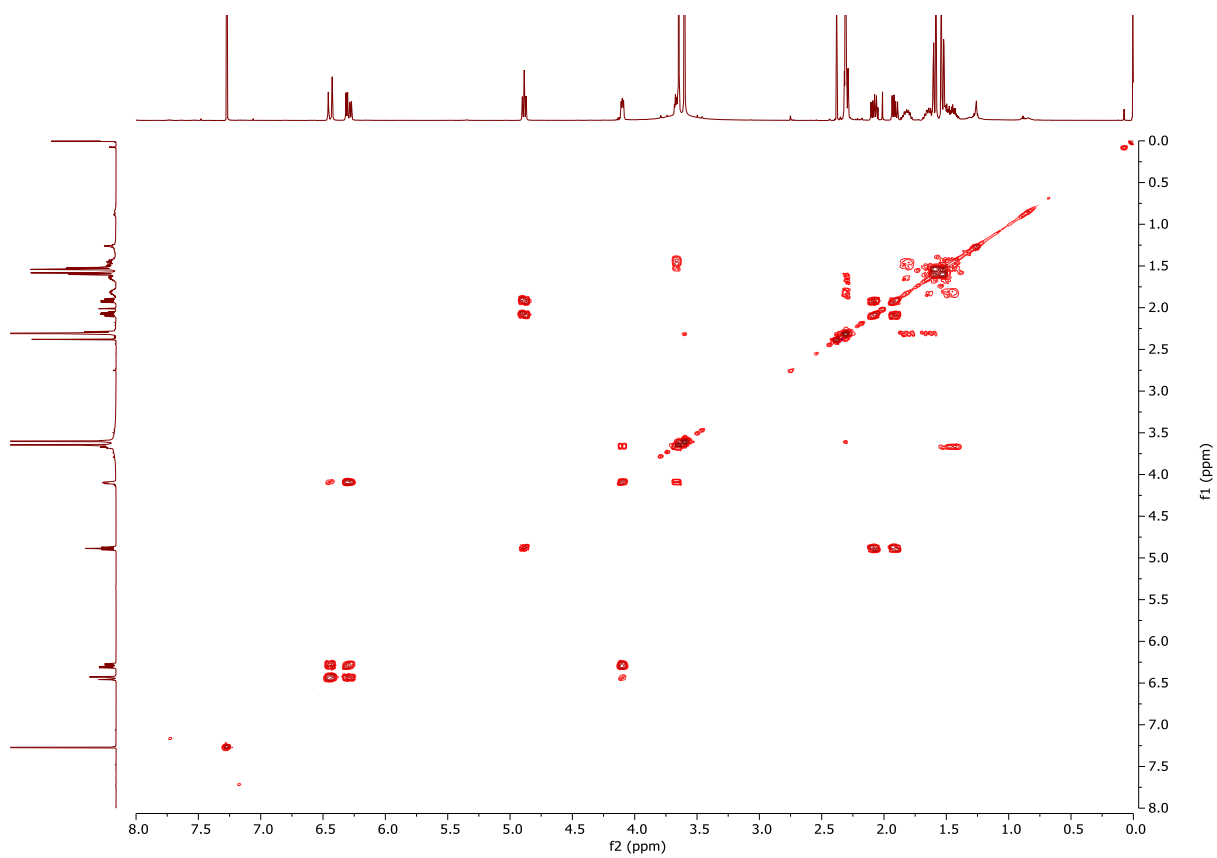

**HSQC:**

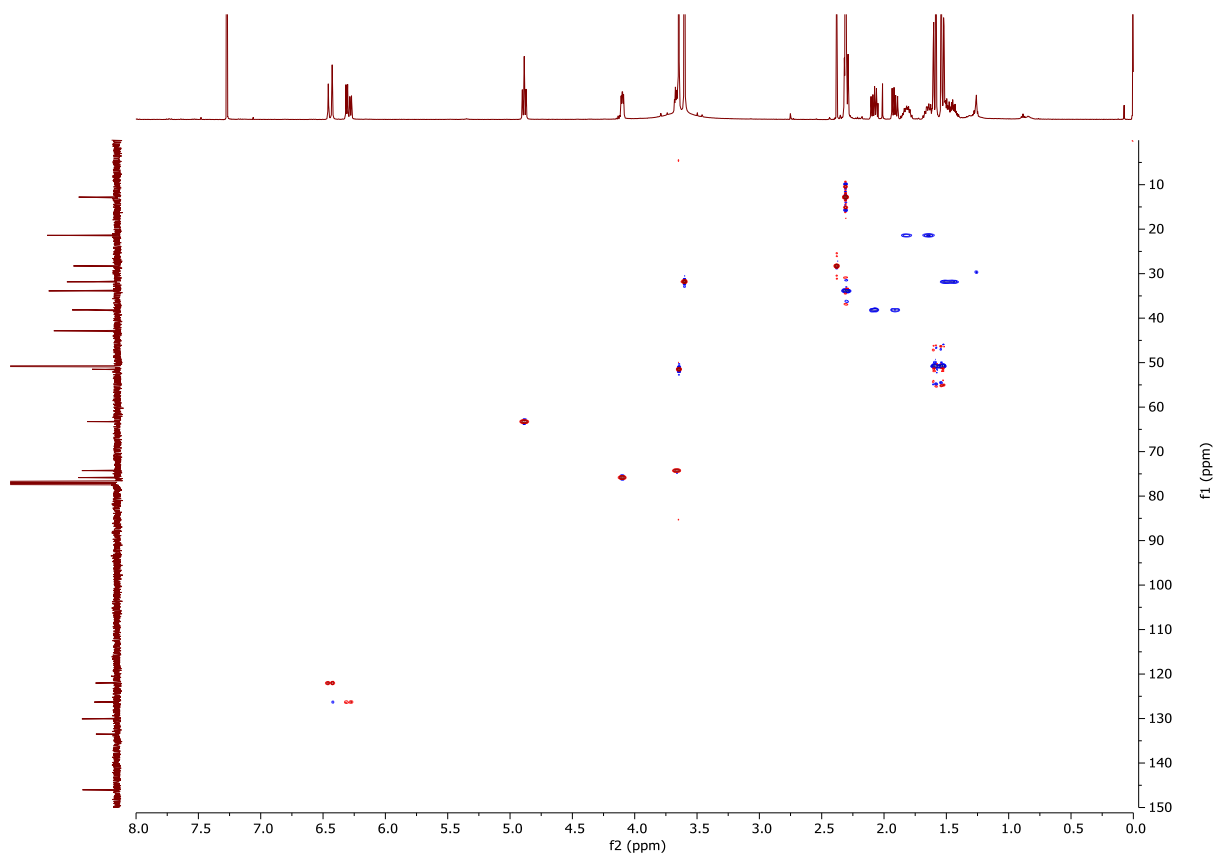

Supplement: ol2c02345_si_001.pdf [file ol2c02345_si_001.pdf]
